# Supplementary material
Source: Research Square preprint supplement (doi:10.21203/rs.3.rs-9676085/v1)
Supplement: Supplementary file 1 [file 67aaf51ba02573ebf21a33c0.xlsx]

## Sheet: F1 Sankey_RPCIntake
RefIntakeGoal to IntakeGoal	Ref_Fruits	Fruits	0.1					Figure 1
RefIntakeGoal to IntakeGoal	Ref_Vegetables	Vegetables	0.1
RefIntakeGoal to IntakeGoal	Ref_Nuts	nuts	0.1
RefIntakeGoal to IntakeGoal	Ref_Legumes	Legumes	0.1
RefIntakeGoal to IntakeGoal	Ref_Sugar	sugar	0.1
RefIntakeGoal to IntakeGoal	Ref_Cereals	Cereals	0.1
RefIntakeGoal to IntakeGoal	Ref_Tubers	Tubers	0.1
RefIntakeGoal to IntakeGoal	Ref_Plant oils	Plant oils	0.1
RefIntakeGoal to IntakeGoal	Ref_Plant spread. oils	Plant spread. oils	0.1
RefIntakeGoal to IntakeGoal	Ref_Anim. spread. fats	Anim. spread. fats	0.1
RefIntakeGoal to IntakeGoal	Ref_Milkequiv	dairy	0.1
RefIntakeGoal to IntakeGoal	Ref_Eggs	Eggs	0.1
RefIntakeGoal to IntakeGoal	Ref_Fish	Fish	0.1
RefIntakeGoal to IntakeGoal	Ref_Red meat	Red meat	0.1
RefIntakeGoal to IntakeGoal	Ref_Poultry	Poultry	0.1
RefIntakeGoal to IntakeGoal	Ref_Other raw products	Other raw products	0.1
RefIntakeGoal to IntakeGoal	Ref_Wholegrain	Wholegrain	0.1
RefIntakeGoal to IntakeGoal	Ref_Processed meat	Processed meat	0.1
RefIntakeGoal to IntakeGoal	Ref_Juices	Juices	0.1
IntakeGoal to Food	Poultry	Meat products	29.2551
IntakeGoal to Food	Poultry	Other foods	0.144932
IntakeGoal to Food	Eggs	Egg products	15.3
IntakeGoal to Food	Legumes	Vegetable products	6.20729
IntakeGoal to Food	Legumes	Grain products	3.55545
IntakeGoal to Food	Legumes	Legumes, nuts, seeds	53.4565
IntakeGoal to Food	Legumes	Other foods	10.2808
IntakeGoal to Food	nuts	Grain products	0.858077
IntakeGoal to Food	nuts	Legumes, nuts, seeds	47.7539
IntakeGoal to Food	nuts	Fats & oils	0.318162
IntakeGoal to Food	nuts	Other foods	0.0699044
IntakeGoal to Food	sugar	Dairy products	4.51939
IntakeGoal to Food	sugar	Grain products	0.877159
IntakeGoal to Food	sugar	Sugar products	0.0370582
IntakeGoal to Food	sugar	Beverages	24.7134
IntakeGoal to Food	sugar	Other foods	0.45302
IntakeGoal to Food	dairy	Dairy products	222.845
IntakeGoal to Food	dairy	Other foods	32.1545
IntakeGoal to Food	Cereals	Dairy products	1.47828
IntakeGoal to Food	Cereals	Grain products	5.90172
IntakeGoal to Food	Cereals	Other foods	1.02
IntakeGoal to Food	Vegetables	Vegetable products	164.455
IntakeGoal to Food	Vegetables	Legumes, nuts, seeds	13.8674
IntakeGoal to Food	Vegetables	Other foods	127.678
IntakeGoal to Food	Processed meat	Meat products	0.1
IntakeGoal to Food	Juices	Juice products	0.1
IntakeGoal to Food	Wholegrain	Grain products	205.8
IntakeGoal to Food	Plant oils	Grain products	3.05624
IntakeGoal to Food	Plant oils	Fats & oils	33.1609
IntakeGoal to Food	Plant oils	Other foods	2.98282
IntakeGoal to Food	Fish	Fish products	28.5423
IntakeGoal to Food	Fish	Other foods	0.857659
IntakeGoal to Food	Red meat	Meat products	11.8463
IntakeGoal to Food	Red meat	Other foods	2.75168
IntakeGoal to Food	Fruits	Vegetable products	18.9019
IntakeGoal to Food	Fruits	Fruit products	138.815
IntakeGoal to Food	Fruits	Other foods	46.2833
IntakeGoal to Food	Tubers	Starchy roots	50.3975
IntakeGoal to Food	Tubers	Other foods	0.602508
IntakeGoal to Food	Plant spread. oils	Grain products	3.05624
IntakeGoal to Food	Plant spread. oils	Other foods	3.06376
IntakeGoal to Food	Anim. spread. fats	Fats & oils	4.9
IntakeGoal to Food	Other raw products	Vegetable products	7.72234
IntakeGoal to Food	Other raw products	Fruit products	72.6072
IntakeGoal to Food	Other raw products	Dairy products	0.874199
IntakeGoal to Food	Other raw products	Juice products	1.01683
IntakeGoal to Food	Other raw products	Grain products	3.53019
IntakeGoal to Food	Other raw products	Meat products	5.24736
IntakeGoal to Food	Other raw products	Sugar products	29.8001
IntakeGoal to Food	Other raw products	Beverages	116.171
IntakeGoal to Food	Other raw products	Fats & oils	0.689336
IntakeGoal to Food	Other raw products	Other foods	7.21716
RefFood to RefIntakeGoal	Ref_Fruit products	Ref_Fruits	59.2849
RefFood to RefIntakeGoal	Ref_Fruit products	Ref_Vegetables	0.00164179
RefFood to RefIntakeGoal	Ref_Fruit products	Ref_Sugar	6.9348
RefFood to RefIntakeGoal	Ref_Fruit products	Ref_Cereals	0.0372968
RefFood to RefIntakeGoal	Ref_Fruit products	Ref_Tubers	0.0248646
RefFood to RefIntakeGoal	Ref_Fruit products	Ref_Other raw products	13.7422
RefFood to RefIntakeGoal	Ref_Vegetable products	Ref_Fruits	4.82553
RefFood to RefIntakeGoal	Ref_Vegetable products	Ref_Vegetables	101.137
RefFood to RefIntakeGoal	Ref_Vegetable products	Ref_Legumes	0.162955
RefFood to RefIntakeGoal	Ref_Vegetable products	Ref_Cereals	0.0106603
RefFood to RefIntakeGoal	Ref_Vegetable products	Ref_Tubers	0.207129
RefFood to RefIntakeGoal	Ref_Vegetable products	Ref_Plant oils	0.0202899
RefFood to RefIntakeGoal	Ref_Vegetable products	Ref_Plant spread. oils	0.0202922
RefFood to RefIntakeGoal	Ref_Vegetable products	Ref_Other raw products	3.69279
RefFood to RefIntakeGoal	Ref_Juice products	Ref_Sugar	0.162663
RefFood to RefIntakeGoal	Ref_Juice products	Ref_Other raw products	0.685704
RefFood to RefIntakeGoal	Ref_Juice products	Ref_Juices	70.5315
RefFood to RefIntakeGoal	Ref_Legumes, nuts, seeds	Ref_Vegetables	2.28393
RefFood to RefIntakeGoal	Ref_Legumes, nuts, seeds	Ref_Nuts	3.56741
RefFood to RefIntakeGoal	Ref_Legumes, nuts, seeds	Ref_Legumes	0.588573
RefFood to RefIntakeGoal	Ref_Legumes, nuts, seeds	Ref_Sugar	0.0387691
RefFood to RefIntakeGoal	Ref_Legumes, nuts, seeds	Ref_Plant oils	0.0788783
RefFood to RefIntakeGoal	Ref_Legumes, nuts, seeds	Ref_Plant spread. oils	0.0788783
RefFood to RefIntakeGoal	Ref_Legumes, nuts, seeds	Ref_Other raw products	0.00837131
RefFood to RefIntakeGoal	Ref_Sugar products	Ref_Vegetables	0.000601647
RefFood to RefIntakeGoal	Ref_Sugar products	Ref_Nuts	0.500176
RefFood to RefIntakeGoal	Ref_Sugar products	Ref_Sugar	43.4156
RefFood to RefIntakeGoal	Ref_Sugar products	Ref_Cereals	2.50186
RefFood to RefIntakeGoal	Ref_Sugar products	Ref_Tubers	0.0764992
RefFood to RefIntakeGoal	Ref_Sugar products	Ref_Plant oils	0.17373
RefFood to RefIntakeGoal	Ref_Sugar products	Ref_Plant spread. oils	1.60114
RefFood to RefIntakeGoal	Ref_Sugar products	Ref_Anim. spread. fats	1.16048
RefFood to RefIntakeGoal	Ref_Sugar products	Ref_Milkequiv	31.1813
RefFood to RefIntakeGoal	Ref_Sugar products	Ref_Eggs	0.0608298
RefFood to RefIntakeGoal	Ref_Sugar products	Ref_Other raw products	8.33984
RefFood to RefIntakeGoal	Ref_Grain products	Ref_Vegetables	0.0348638
RefFood to RefIntakeGoal	Ref_Grain products	Ref_Nuts	3.00056
RefFood to RefIntakeGoal	Ref_Grain products	Ref_Legumes	0.0435398
RefFood to RefIntakeGoal	Ref_Grain products	Ref_Sugar	13.5927
RefFood to RefIntakeGoal	Ref_Grain products	Ref_Cereals	140.963
RefFood to RefIntakeGoal	Ref_Grain products	Ref_Tubers	0.532084
RefFood to RefIntakeGoal	Ref_Grain products	Ref_Plant oils	2.49334
RefFood to RefIntakeGoal	Ref_Grain products	Ref_Plant spread. oils	5.51782
RefFood to RefIntakeGoal	Ref_Grain products	Ref_Anim. spread. fats	7.02177
RefFood to RefIntakeGoal	Ref_Grain products	Ref_Milkequiv	13.8527
RefFood to RefIntakeGoal	Ref_Grain products	Ref_Eggs	6.51331
RefFood to RefIntakeGoal	Ref_Grain products	Ref_Other raw products	7.92289
RefFood to RefIntakeGoal	Ref_Grain products	Ref_Wholegrain	4.50547
RefFood to RefIntakeGoal	Ref_Starchy roots	Ref_Vegetables	0.00203675
RefFood to RefIntakeGoal	Ref_Starchy roots	Ref_Tubers	88.7384
RefFood to RefIntakeGoal	Ref_Starchy roots	Ref_Other raw products	0.0326071
RefFood to RefIntakeGoal	Ref_Fats & oils	Ref_Nuts	0.0289492
RefFood to RefIntakeGoal	Ref_Fats & oils	Ref_Plant oils	22.0042
RefFood to RefIntakeGoal	Ref_Fats & oils	Ref_Plant spread. oils	10.6502
RefFood to RefIntakeGoal	Ref_Fats & oils	Ref_Anim. spread. fats	7.31398
RefFood to RefIntakeGoal	Ref_Fats & oils	Ref_Milkequiv	3.20615
RefFood to RefIntakeGoal	Ref_Fats & oils	Ref_Other raw products	1.53507
RefFood to RefIntakeGoal	Ref_Dairy products	Ref_Nuts	0.00819229
RefFood to RefIntakeGoal	Ref_Dairy products	Ref_Sugar	9.99176
RefFood to RefIntakeGoal	Ref_Dairy products	Ref_Cereals	1.88646
RefFood to RefIntakeGoal	Ref_Dairy products	Ref_Plant spread. oils	0.0148065
RefFood to RefIntakeGoal	Ref_Dairy products	Ref_Milkequiv	572.524
RefFood to RefIntakeGoal	Ref_Dairy products	Ref_Other raw products	2.86454
RefFood to RefIntakeGoal	Ref_Egg products	Ref_Plant oils	0.410686
RefFood to RefIntakeGoal	Ref_Egg products	Ref_Plant spread. oils	0.410686
RefFood to RefIntakeGoal	Ref_Egg products	Ref_Eggs	22.8047
RefFood to RefIntakeGoal	Ref_Fish products	Ref_Vegetables	6.05881e-05
RefFood to RefIntakeGoal	Ref_Fish products	Ref_Cereals	0.133648
RefFood to RefIntakeGoal	Ref_Fish products	Ref_Tubers	0.00132402
RefFood to RefIntakeGoal	Ref_Fish products	Ref_Plant oils	0.0581595
RefFood to RefIntakeGoal	Ref_Fish products	Ref_Plant spread. oils	0.0581793
RefFood to RefIntakeGoal	Ref_Fish products	Ref_Anim. spread. fats	6.05881e-05
RefFood to RefIntakeGoal	Ref_Fish products	Ref_Eggs	0.000237745
RefFood to RefIntakeGoal	Ref_Fish products	Ref_Fish	32.4631
RefFood to RefIntakeGoal	Ref_Fish products	Ref_Other raw products	0.00520697
RefFood to RefIntakeGoal	Ref_Meat products	Ref_Vegetables	0.230898
RefFood to RefIntakeGoal	Ref_Meat products	Ref_Sugar	0.028864
RefFood to RefIntakeGoal	Ref_Meat products	Ref_Cereals	0.190248
RefFood to RefIntakeGoal	Ref_Meat products	Ref_Tubers	0.0128018
RefFood to RefIntakeGoal	Ref_Meat products	Ref_Plant oils	0.0693593
RefFood to RefIntakeGoal	Ref_Meat products	Ref_Plant spread. oils	0.0697166
RefFood to RefIntakeGoal	Ref_Meat products	Ref_Anim. spread. fats	4.51714
RefFood to RefIntakeGoal	Ref_Meat products	Ref_Milkequiv	1.48691
RefFood to RefIntakeGoal	Ref_Meat products	Ref_Eggs	0.159563
RefFood to RefIntakeGoal	Ref_Meat products	Ref_Red meat	26.1324
RefFood to RefIntakeGoal	Ref_Meat products	Ref_Poultry	22.4229
RefFood to RefIntakeGoal	Ref_Meat products	Ref_Other raw products	16.5383
RefFood to RefIntakeGoal	Ref_Meat products	Ref_Processed meat	37.711
RefFood to RefIntakeGoal	Ref_Other foods	Ref_Fruits	4.29982
RefFood to RefIntakeGoal	Ref_Other foods	Ref_Vegetables	116.951
RefFood to RefIntakeGoal	Ref_Other foods	Ref_Nuts	0.00934887
RefFood to RefIntakeGoal	Ref_Other foods	Ref_Legumes	1.35466
RefFood to RefIntakeGoal	Ref_Other foods	Ref_Sugar	2.4122
RefFood to RefIntakeGoal	Ref_Other foods	Ref_Cereals	6.04119
RefFood to RefIntakeGoal	Ref_Other foods	Ref_Tubers	15.1227
RefFood to RefIntakeGoal	Ref_Other foods	Ref_Plant oils	13.0104
RefFood to RefIntakeGoal	Ref_Other foods	Ref_Plant spread. oils	13.1156
RefFood to RefIntakeGoal	Ref_Other foods	Ref_Anim. spread. fats	0.570288
RefFood to RefIntakeGoal	Ref_Other foods	Ref_Milkequiv	56.7525
RefFood to RefIntakeGoal	Ref_Other foods	Ref_Eggs	0.761958

## Sheet: F2+F5 RPC Intake
				PHD								Figure 2																			Figure 5
0	0	Ref	PHD2.0	Range	NoNutr	SimpleObj	StdDev	EarlySwan	LateSwan
Poultry	Chicken fresh meat	9.59493	13.6749	7.16863	11.1928	0	18.4951	14.2118	11.8452
Poultry	Turkey fresh meat	5.84206	7.29059	0.398736	7.23907	0	8.05997	7.5379	6.42593
Poultry	Other	3.88343	2.87006	0.0261677	2.01468	0.0102862	2.23638	2.2595	5.94201
Poultry	Birds meat	0	0	0	0	0	0	0	0
Poultry	Processed meat	0.897934	0	0.00826874	0	0.00119125	0.0133818	0	0
Poultry	DGEgoal
Poultry	PHDgoal		30		30	30	30	30	30
Poultry	Other birds meat	3.79587	5.56445	1.11022e-16	8.95343	30.2937	1.50039	6.29602	6.09206
Poultry	PHD up			60
Poultry	PHD low			0.001
Eggs	Other	0.990396	0	0.208479	0	0.123082	0.0902678	0	0
Eggs	Boiled eggs	17.837	15.3	17.76	15.3	11.2905	14.716	15.7565	15.7711
Eggs	Brioche type products	0.348787	0	0	0	0	0	0	0
Eggs	Egg products	0	0	0	0	0	0	0	0
Eggs	DGEgoal
Eggs	PHDgoal		15		15	15	15	15	15
Eggs	Other egg products	4.96768	0	0.0866679	0	1.19033	0.308369	0	0
Eggs	Other grain products	6.16452	0	0.102593	0	3.16714	0.0379461	0	0
Eggs	PHD up			25
Eggs	PHD low			0.001
Potatoes	Potato boiled	86.661	50.3975	86.3074	51	51.6369	50.6376	51.8396	52.5703
Potatoes	Other	0.900969	2.98647e-06	0.532122	4.29559e-07	0.820169	0.734861	0.000142871	0
Potatoes	Potato puree	4.44306	0	0	0	0.010196	0	0	0
Potatoes	Potato products	0	0	0	0	0	0	0	0
Potatoes	DGEgoal
Potatoes	PHDgoal		50		50	50	50	50	50
Potatoes	Other composite dishes	10.6767	0.602508	2.92307	1.42037e-20	0.103032	0.210952	0.73055	0
Potatoes	Other potato products	2.03409	0	5.68434e-14	0	0	0.986899	0	0
Potatoes	PHD up			100
Potatoes	PHD low			0.001
Legumes	Legume (beans) soup	0.0470077	3.84433	0.862295	3.18237	0	0.155827	3.89001	5.42079
Legumes	Other	1.6629	37.2195	5.57299	41.904	75.3262	42.59	38.2831	36.7814
Legumes	Legumes	0	0	0	0	0	0	0	0
Legumes	Canned legumes	0.289813	18.9399	1.83649	17.1891	0.286814	17.0644	19.9056	16.1119
Legumes	DGEgoal
Legumes	PHDgoal		75		75	75	75	75	75
Legumes	Lentils	0.0513742	4.64755	0.872127	3.79433	0.0513742	5.681	4.70622	6.08601
Legumes	Borlotti beans	0.0986301	8.84878	1.41196	7.43016	0.0986301	10.2718	8.97812	11.3629
Legumes	PHD up			150
Legumes	PHD low			0.001
nuts	Cashew nuts	0.17293	9.93163	7.98231	4.62032	0.17293	13.6613	10.145	11.4966
nuts	Chestnuts	0.092819	10.16	5.18005	2.20787	0.092819	15.2215	10.3211	12.2454
nuts	Peanuts	1.11497	3.32294	11.4189	15.5262	13.8549	5.90077	5.07194	1.40983
nuts	Other	1.62184	0.583197	0.594404	0.490175	37.3136	3.48124	0.286135	1.74478
nuts	Grain products	3.00056	0.858077	0.955209	0.761976	0.0251645	0.46848	0.896773	0.952142
nuts	Nuts, seeds	0	0	0	0	0	0	0	0
nuts	DGEgoal
nuts	PHDgoal		50		50	50	50	50	50
nuts	Other nuts and seeds	1.11151	24.1442	28.1376	25.3935	1.11087	11.7754	23.7878	22.6599
nuts	PHD up			75
nuts	PHD low			0.001
sugar	White sugar	4.26858	0	0	0	0	0	0	0
sugar	Jelly candies	24.8157	0	0	0	0.098638	0	0	0
sugar	Other	46.9388	1.36724	1.40899	1.2842	27.4213	29.2854	1.48128	1.06425
sugar	Brioche type products	0.383309	0	0	0	0	0	0	0
sugar	Dairy products	9.99176	4.51939	4.58701	4.44896	4.02228	2.25677	4.57204	4.55303
sugar	Cola	45.7638	24.7134	24.004	24.8668	0	0	25.4889	25.9249
sugar	PHDgoal		30		30	30	30	30	30
sugar	PHD up			30
sugar	PHD low			0.001
Cereals	Rye bread, wholemeal	0.294989	51.7141	57.568	45.9223	0.294989	13.4473	54.0462	57.3832
Cereals	Multigrain bread	45.3337	0	0	0	0	0	0	0
Cereals	Rye-wheat bread, wholemeal	1.17531	12.3856	14.0445	11.3156	94.9228	57.617	14.7185	6.20822
Cereals	Other	13.932	2.49828	2.56388	2.42825	0.499801	4.15455	2.53552	2.46752
Cereals	Brioche type products	1.70692	0	0	0	0	0	0	0
Cereals	Pasta wholemeal	0.627225	63.4623	60.4708	78.8241	89.6195	47.6884	63.6668	68.4577
Cereals	Grain products	0	0	0	0	0	0	0	0
Cereals	DGEgoal
Cereals	PHDgoal		210		210	210	210	210	210
Cereals	Other grain products	96.33	84.1397	79.5528	75.7097	35.4581	97.888	85.8282	86.2787
Cereals	PHD up			210
Cereals	PHD low			210
Fruit	Fruit salad	4.29982	46.2833	48.8865	15.4886	70.4408	9.32971	49.9484	30.5165
Fruit	Oranges	7.34367	5.42749	11.5656	12.3201	15.5429	0	5.47308	8.73772
Fruit	Pears	3.15516	16.6015	22.2	8.98634	32.9696	9.48421	17.5965	14.1406
Fruit	Other	4.82553	18.9019	48.4297	29.6178	4.82553	3.22216	19.6917	28.8639
Fruit	Fruit and vegetable juices and nectars (including concentrates)	0	0	0	0	0	0	0	0
Fruit	Fruit products	0	0	0	0	0	0	0	0
Fruit	Bananas	18.0525	30.6783	30.6331	20.6297	34.5292	155.197	31.9498	25.4859
Fruit	DGEgoal
Fruit	PHDgoal		200		200	200	200	200	200
Fruit	Other fruit products	30.7336	86.1075	138.285	108.957	51.9732	33.0479	85.6217	102.537
Fruit	PHD up			300
Fruit	PHD low			100
Vegetables	Vegetable products	0	0	0	0	0	0	0	0
Vegetables	Cucumbers	16.1359	16.4071	16.6769	16.6753	25.1304	11.5437	16.6812	16.3663
Vegetables	Tomatoes	15.398	22.2153	25.2102	21.7149	40.512	18.2485	25.6589	19.9499
Vegetables	Other	8.30703	15.7868	22.8309	7.01836	14.3868	61.4915	16.2929	17.279
Vegetables	Preserved vegetables	16.3323	49.9515	31.2911	48.0067	26.3744	25.2534	54.6598	34.6287
Vegetables	Mixed salad	84.6022	85.5648	85.838	85.0119	92.0575	111.091	85.8515	85.2128
Vegetables	DGEgoal
Vegetables	PHDgoal		300		300	300	300	300	300
Vegetables	Other composite dishes	26.5954	40.1939	54.6465	28.4139	28.254	11.7301	41.8602	42.1655
Vegetables	Other vegetable products	53.2703	75.8807	89.8832	87.1589	76.3371	76.0635	74.4172	99.8196			for powerpoint format
Vegetables	PHD up			600
Vegetables	PHD low			200
Processed meat	Other	0	0	0	0	0	0	0	0
Processed meat	Processed meat	37.711	0.102	0.1	0.102	0.105141	0.105141	0.105141	0.105141
Processed meat	DGEgoal
Processed meat	PHDgoal		0.1		0.1	0.1	0.1	0.1	0.1
Processed meat	PHD up			0.1
Processed meat	PHD low			0.001
Juices	Fruit and vegetable juices and nectars (including concentrates)	70.5315	0.102	0.1	0.102	0.105141	0.105141	0.105141	0.105141
Juices	DGEgoal
Juices	PHDgoal		0.1		0.1	0.1	0.1	0.1	0.1
Juices	PHD up			0.1
Juices	PHD low			0.001
Wholegrain	Grain products	4.50547	205.8	205.8	205.8	212.137	212.137	212.137	212.137
Wholegrain	DGEgoal
Wholegrain	PHDgoal		210		210	210	210	210	210
Wholegrain	PHD up			210
Wholegrain	PHD low			210
Plant oils	Other	3.0659	10.565	3.41844	10.494	20.8366	3.95311	10.5553	14.0006
Plant oils	Olive oils	1.33056	10.0476	3.60995	9.93938	15.0073	19.5628	10.5255	8.86334
Plant oils	Composite dishes	5.77172	2.97287	3.14801	3.01808	0.119178	0.0722646	2.97083	3.01298
Plant oils	Grain products	2.49334	3.05624	3.39131	2.78063	3.40698	3.15399	3.24789	3.03115
Plant oils	Sauces	7.23818	0	0	0	0.269002	0.00380742	7.34215e-05	0
Plant oils	Vegetable oils	0	0	0	0	0	0	0	0
Plant oils	Margarine	18.249	0	2.77303	0.485141	0	6.23678	0	0.318096
Plant oils	Sunflower seed oil	0.489978	12.5582	3.65926	12.4827	0.767878	7.42417	13.1074	11.1808
Plant oils	DGEgoal
Plant oils	PHDgoal		40		40	40	40	40	40
Plant oils	PHD up			80
Plant oils	PHD low			20
Spread fats	Butter	6.80088	4.9	7.63613	5.1	0	1.8082	5.05087	5.25703
Spread fats	Other	30.6061	3.06376	5.19272	3.33937	3.59922	4.4808	3.06054	3.27729
Spread fats	Grain products	12.5396	3.05624	3.39131	2.78063	7.87223	5.06944	3.24789	3.03115
Spread fats	DGEgoal
Spread fats	Other fats and emulsions	4.86251	33.1609	12.458	32.9161	34.604	30.9355	34.1794	34.0193
Spread fats	PHD up		0	0.001	0	0	0	0	0
Spread fats	PHD low		0	0.001	0	0	0	0	0
spread anim fats	Butter	6.80088	4.9	7.63613	5.1	0	1.8082	5.05087	5.25703
spread anim fats	Other	7.00082	0	2.36387	0	0.791783	1.32723	0	0
spread anim fats	Brioche type products	0.301452	0	0	0	0	0	0	0
spread anim fats	PHDgoal		5		5	5	5	5	5
spread anim fats	Other grain products	6.72032	0	0	0	4.46525	1.91544	0	0
spread anim fats	PHD up			10
spread anim fats	PHD low			0.001
spread plant oils	Other	2.25417	0.0099622	0.00950613	0	2.51247	0.00588744	0.00881013	0.0254312
spread plant oils	Composite dishes	5.87616	3.0538	3.23336	3.10042	0.119223	0.0726965	3.05166	3.09518
spread plant oils	Grain products	5.51782	3.05624	3.39131	2.78063	3.40699	3.15399	3.24789	3.03115
spread plant oils	Sauces	7.239	0	0	0	0.269756	0.00382604	7.37641e-05	0
spread plant oils	Margarine	8.98882	0	1.36582	0.23895	0	3.07203	0	0.156674
spread plant oils	PHDgoal		6		6	6	6	6	6
spread plant oils	Other fats and emulsions	1.98306	0	0	0	0	0	0	0
spread plant oils	PHD up			8
spread plant oils	PHD low			0.001
Milkequiv	Cheese	336.597	133.731	205.131	156.793	142.361	8.57022	135.207	152.036
Milkequiv	Milk	100.706	44.764	103.691	33.5991	5.06234	127.156	49.7497	44.8986
Milkequiv	Other	177.588	32.1545	113.707	28.9393	95.9289	94.4731	32.8583	29.4135
Milkequiv	Grain products	13.8527	0	0	0	6.27863	0.773409	0.000200353	0
Milkequiv	DGEgoal
Milkequiv	PHDgoal		250		250	250	250	250	250
Milkequiv	Other milk products	84.7748	44.3506	77.4717	35.669	2.91309	31.8788	45.0364	36.5035
Milkequiv	PHD up			500
Milkequiv	PHD low			0.001
Fish	Fish products	0	0	0	0	0	0	0	0
Fish	Salmons	3.44592	0	1.2057	3.41414	3.44592	0	0	1.51335
Fish	Other	0.862785	0.857659	2.21461	0.00155352	0.69203	0.502079	0.859457	0.346539
Fish	Canned tunas and similar	1.32869	0	0	1.28388	0	0	0	0
Fish	DGEgoal
Fish	PHDgoal		30		30	30	30	30	30
Fish	Other fish products	27.6885	28.5423	17.0018	25.9004	26.1673	29.8031	29.4458	28.4453
Fish	PHD up			100
Fish	PHD low			0.001
Red meat	Other	7.19786	8.51911	0.00822664	2.49929	0.00692559	9.62464	8.61953	2.46235
Red meat	Mammals meat	0	0	0	0	0	0	0	0
Red meat	Pig fresh meat	11.7286	0	1.16528	5.33042	0	0	0.304958	4.2184
Red meat	Composite dishes	5.58769	2.24772	2.24794	0.604472	0.0636174	0.418242	2.2017	2.69483
Red meat	Processed meat	29.8637	0.102	0.0591496	0.102	0.0748296	0.0713847	0.105141	0.105141
Red meat	DGEgoal
Red meat	PHDgoal		15		15	15	15	15	15
Red meat	Other mammals meat	16.6259	3.83117	4.15865	6.76382	15.0072	5.03834	3.92129	5.67188
Red meat	PHD up			30
Red meat	PHD low			0.001
0	0	0	0	0	0	0	0	0	0
0	0	0	0	0	0	0	0	0	0
0	0	0	0	0	0	0	0	0	0
0	0	0	0	0	0	0	0	0	0
0	0	0	0	0	0	0	0	0	0

## Sheet: F3 Treemap
						Figure 3
		consol	PHD_RPCequiv
ALCOHOL	Wine, red	34.3601	2.22249
ALCOHOL	Beer, regular	50.3137	0.001
ALCOHOL	Other alcohol	49.3767	30.815
Vegetable products	Vegetable products	28.0375	74.1943
Fish products	Fish products	45.472	30.65
Composite dishes	Fruit salad	3.19047	34.3422
Composite dishes	Mixed vegetables soup, clear	28.929	22.9506
Composite dishes	Mixed salad	28.1	28.4197
Composite dishes	Other composite dishes	102.387	64.8868
Legumes	Soyabeans (without pods)	0.251355	28.4324
Legumes	Other legumes	1.96986	41.1004
Coffee, cocoa, tea	Fruit infusion	13.0657	44.3073
Coffee, cocoa, tea	Other coffee, cocoa, tea	39.2007	45.1223
Fruit products	Jam	33.5065	0.001
Fruit products	Dried figs	0.371336	41.6025
Fruit products	Dried vine fruits (raisins etc.)	0.35027	34.592
Fruit products	Dried apricots	0.325715	29.0837
Fruit products	Bananas	16.2988	27.6982
Fruit products	Other fruit products	25.9935	115.627
Dairy products	Starchy pudding	72.5295	58.7421
Dairy products	Cheese, Gouda	109.878	69.2642
Dairy products	Cow milk, whole	27.6371	7.10233
Dairy products	Cow milk, semi skimmed	27.7133	17.3125
Dairy products	Flavoured yoghurt	32.6656	0.001
Dairy products	Other dairy products	115.905	12.1794
Egg products	Boiled eggs	29.1878	25.0364
Egg products	Other egg products	9.44834	0
Products for non-standard diets	Products for non-standard diets	9.36323	42.8818
Juice products	Juices	28.4117	0.141881
Grain products	Rye bread, wholemeal	0.986843	173.002
Grain products	Wheat bread, white	55.4432	0.001				Grain products		Products for non-standard diets		Fruit products
Grain products	Multigrain bread	159.62	0.001				Fats and oils		Starchy root products		Vegetable products
Grain products	Rye-wheat bread, wholemeal	3.66289	38.6002				Dairy products		Composite dishes		Beverages
Grain products	Crisp bread, wheat, wholemeal	1.0812	107.715				Nuts, seeds, legumes		Sauces		Coffee, cocoa, tea
Grain products	Oat popped	0.377822	67.2739				Meat products		Fish products		Egg products
Grain products	Pumpernickel	0.586105	29.3538				Alcohol		Sugar products		Juices
Grain products	Oat high-bran flakes	2.67567	70.6985
Grain products	Pasta wholemeal	0.896932	90.7512
Grain products	Mixed wheat-rye bread	35.7569	0.001
Grain products	Wheat bread, wholemeal	0.920379	47.8718
Grain products	Maize flakes	42.7461	21.2413
Grain products	Leavened bread	39.883	0.001
Grain products	Other grain products	288.072	8.0943
Meat products	Meat products	244.837	72.5287
Sauces	Sauces	61.4148	2.01795
Starchy root products	Potato boiled	68.2765	39.706
Sugar products	Honey	6.0339	89.7098
Sugar products	Chocolate coated confectionery	91.4127	0.001
Sugar products	Filled chocolate	41.7971	0.001
Sugar products	Milk chocolate	42.6386	0.001
Sugar products	Jelly candies	91.3653	0.001
Sugar products	Other sugar products	41.8674	1.35208
Beverages	Beverages	11.4441	19.0945
Beverages	Cola	88.138	47.5963
Fats & oils	Butter	36.9288	26.607
Fats & oils	Olive oils	11.7622	88.8208
Fats & oils	Traditional margarine	209.777	0.001
Fats & oils	Sunflower seed oil	4.33141	111.015
Fats & oils	Rape seed oil	2.28721	82.4973
Fats & oils	Other fats & oils	27.3374	19.7159
Nuts, seeds	Tree nuts	2.19465	100.08
Nuts, seeds	Cashew nuts	1.02807	59.0436
Nuts, seeds	Other nuts, seeds	19.8407	101.716

## Sheet: T4 nutrient intake proport
			Energy (in kcal)			Carbohydrates (in g)			Protein (in g)			Fat (in g)
			Ref	PHD 2.0		Ref	PHD 2.0		Ref	PHD 2.0		Ref	PHD 2.0
	PHD 2.0 recomm.			2400			318			84			93
	total		2707.87	2448		277.892	311.64		96.4995	82.32		116	91.14
	Fruit products		0.0283788	0.101554		0.0614898	0.171955		0.00737187	0.0397185		0.00279311	0.0115125
	Vegetable products		0.0103541	0.0303081		0.0133014	0.0370961		0.0149379	0.0359018		0.00277077	0.0119983
	Juice products		0.0104923	5.79579e-05		0.0221485	7.20244e-05		0.00304032	3.65025e-05		0.000596911	4.56722e-05
	Legumes, nuts, seeds		0.00933744	0.134956		0.00331588	0.050828		0.00935269	0.163337		0.0174236	0.262172
	Sugar products		0.11637	0.0371985		0.18399	0.0716881		0.0445372	0.0013591		0.0866898	0
	Grain products		0.233656	0.267403		0.388947	0.40387		0.187295	0.266076		0.11592	0.0674562
	Starchy roots		0.0258285	0.0162198		0.036267	0.0183703		0.0142154	0.00946594		0.00506641	0.0036595
	Fats & oils		0.10799	0.134255		0.00121926	0.000344064		0.00397254	0.00112257		0.282402	0.407001
	Dairy products		0.142669	0.0672388		0.0853771	0.0369224		0.215483	0.100017		0.196689	0.103319
	Egg products		0.0142681	0.0102273		0.00140434	0.000832199		0.0333686	0.0257388		0.0233155	0.0190352
	Fish products		0.0167926	0.0125204		0.00105065	0.00110002		0.0682594	0.0615705		0.0171091	0.0107736
	Meat products		0.0904168	0.0296277		0.00334181	0.00248426		0.255635	0.126142		0.13735	0.033782
	Other foods		0.0862646	0.0811636		0.0559428	0.0733571		0.116113	0.148634		0.0988891	0.0669644
	Beverages		0.105581	0.0772704		0.142186	0.131081		0.0263379	0.02088		0.00880671	0.00228125

## Sheet: F4 Recommendation
					Fruit products	Fruit products	Fruit products	Fruit products				Vegetable products	Vegetable products	Vegetable products		Legumes, nuts, seeds	Legumes, nuts, seeds	Legumes, nuts, seeds	Legumes, nuts, seeds		Sugar products	Sugar products	Sugar products	Sugar products	0	0	0	0	Grain products	Grain products	Grain products	Grain products	Grain products		Starchy roots		Fats & oils	Fats & oils	Fats & oils	Fats & oils		Dairy products	Dairy products	Dairy products	Dairy products	Dairy products		Egg products	Egg products
Figure 4					Jam	Pears	Bananas	Other fruit products				Cucumbers	Canned/jarred vegetables	Other vegetable products		Tree nuts	Chestnuts	Soyabeans (without pods)	Other legumes, nuts, seeds		Honey	Chocolate coated confectionery	Jelly candies	Other sugar products					Rye bread, wholemeal	Multigrain bread	Crisp bread, wheat, wholemeal	Pasta wholemeal	Other grain products		Potato boiled		Olive oils	Traditional margarine	Sunflower seed oil	Other fats & oils	Starchy pudding	Cheese, Gouda	Cow milk, whole	Cow milk, semi skimmed	Flavoured yoghurt	Other dairy products		Boiled eggs	Other egg products
	Fruit products	consol		Fruit products	20.3316	3.15516	18.0525	46.6728	0	0	0	0	0	0	0	0	0	0	0	0	0	0	0	0	0	0	0	0	0	0	0	0	0	0	0	0	0	0	0	0	0	0	0	0	0	0	0	0	0
	Fruit products	PHD_RPCequiv			0	16.6015	30.6783	165.018	0	0	0	0	0	0	0	0	0	0	0	0	0	0	0	0	0	0	0	0	0	0	0	0	0	0	0	0	0	0	0	0	0	0	0	0	0	0	0	0	0
	Fruit products	PHD_RPCequiv			-20.3316	13.4464	12.6258	118.346	0	0	0	0	0	0	0	0	0	0	0	0	0	0	0	0	0	0	0	0	0	0	0	0	0	0	0	0	0	0	0	0	0	0	0	0	0	0	0	0	0
					0	0	0	0	0	0	0	0	0	0	0	0	0	0	0	0	0	0	0	0	0	0	0	0	0	0	0	0	0	0	0	0	0	0	0	0	0	0	0	0	0	0	0	0	0
					0	0	0	0	0	0	0	0	0	0	0	0	0	0	0	0	0	0	0	0	0	0	0	0	0	0	0	0	0	0	0	0	0	0	0	0	0	0	0	0	0	0	0	0	0
	Vegetable products	consol		Vegetable products	0	0	0	0	0	0	0	16.1359	0	94.0536	0	0	0	0	0	0	0	0	0	0	0	0	0	0	0	0	0	0	0	0	0	0	0	0	0	0	0	0	0	0	0	0	0	0	0
	Vegetable products	PHD_RPCequiv			0	0	0	0	0	0	0	16.4071	28.1797	152.699	0	0	0	0	0	0	0	0	0	0	0	0	0	0	0	0	0	0	0	0	0	0	0	0	0	0	0	0	0	0	0	0	0	0	0
	Vegetable products	PHD_RPCequiv			0	0	0	0	0	0	0	0.271252	28.1797	58.6457	0	0	0	0	0	0	0	0	0	0	0	0	0	0	0	0	0	0	0	0	0	0	0	0	0	0	0	0	0	0	0	0	0	0	0
					0	0	0	0	0	0	0	0	0	0	0	0	0	0	0	0	0	0	0	0	0	0	0	0	0	0	0	0	0	0	0	0	0	0	0	0	0	0	0	0	0	0	0	0	0
					0	0	0	0	0	0	0	0	0	0	0	0	0	0	0	0	0	0	0	0	0	0	0	0	0	0	0	0	0	0	0	0	0	0	0	0	0	0	0	0	0	0	0	0	0
	Legumes, nuts, seeds	consol		Legumes, nuts, seeds	0	0	0	0	0	0	0	0	0	0	0	0	0.092819	0	6.57288	0	0	0	0	0	0	0	0	0	0	0	0	0	0	0	0	0	0	0	0	0	0	0	0	0	0	0	0	0	0
	Legumes, nuts, seeds	PHD_RPCequiv			0	0	0	0	0	0	0	0	0	0	0	14.6744	10.16	14.6874	75.5559	0	0	0	0	0	0	0	0	0	0	0	0	0	0	0	0	0	0	0	0	0	0	0	0	0	0	0	0	0	0
	Legumes, nuts, seeds	PHD_RPCequiv			0	0	0	0	0	0	0	0	0	0	0	14.6744	10.0672	14.6874	68.983	0	0	0	0	0	0	0	0	0	0	0	0	0	0	0	0	0	0	0	0	0	0	0	0	0	0	0	0	0	0
					0	0	0	0	0	0	0	0	0	0	0	0	0	0	0	0	0	0	0	0	0	0	0	0	0	0	0	0	0	0	0	0	0	0	0	0	0	0	0	0	0	0	0	0	0
					0	0	0	0	0	0	0	0	0	0	0	0	0	0	0	0	0	0	0	0	0	0	0	0	0	0	0	0	0	0	0	0	0	0	0	0	0	0	0	0	0	0	0	0	0
	Sugar products	consol		Sugar products	0	0	0	0	0	0	0	0	0	0	0	0	0	0	0	0	0	19.459	26.7411	29.9648	0	0	0	0	0	0	0	0	0	0	0	0	0	0	0	0	0	0	0	0	0	0	0	0	0
	Sugar products	PHD_RPCequiv			0	0	0	0	0	0	0	0	0	0	0	0	0	0	0	0	29.3169	0	0	0.520236	0	0	0	0	0	0	0	0	0	0	0	0	0	0	0	0	0	0	0	0	0	0	0	0	0
	Sugar products	PHD_RPCequiv			0	0	0	0	0	0	0	0	0	0	0	0	0	0	0	0	29.3169	-19.459	-26.7411	-29.4446	0	0	0	0	0	0	0	0	0	0	0	0	0	0	0	0	0	0	0	0	0	0	0	0	0
					0	0	0	0	0	0	0	0	0	0	0	0	0	0	0	0	0	0	0	0	0	0	0	0	0	0	0	0	0	0	0	0	0	0	0	0	0	0	0	0	0	0	0	0	0
					0	0	0	0	0	0	0	0	0	0	0	0	0	0	0	0	0	0	0	0	0	0	0	0	0	0	0	0	0	0	0	0	0	0	0	0	0	0	0	0	0	0	0	0	0
	Grain products	consol		Grain products	0	0	0	0	0	0	0	0	0	0	0	0	0	0	0	0	0	0	0	0	0	0	0	0	0	68.0428	0	0.627225	170.569	0	0	0	0	0	0	0	0	0	0	0	0	0	0	0	0
	Grain products	PHD_RPCequiv			0	0	0	0	0	0	0	0	0	0	0	0	0	0	0	0	0	0	0	0	0	0	0	0	82.6443	0	31.963	63.4623	103.333	0	0	0	0	0	0	0	0	0	0	0	0	0	0	0	0
	Grain products	PHD_RPCequiv			0	0	0	0	0	0	0	0	0	0	0	0	0	0	0	0	0	0	0	0	0	0	0	0	82.6443	-68.0428	31.963	62.8351	-67.236	0	0	0	0	0	0	0	0	0	0	0	0	0	0	0	0
					0	0	0	0	0	0	0	0	0	0	0	0	0	0	0	0	0	0	0	0	0	0	0	0	0	0	0	0	0	0	0	0	0	0	0	0	0	0	0	0	0	0	0	0	0
					0	0	0	0	0	0	0	0	0	0	0	0	0	0	0	0	0	0	0	0	0	0	0	0	0	0	0	0	0	0	0	0	0	0	0	0	0	0	0	0	0	0	0	0	0
	Starchy roots	consol		Starchy roots	0	0	0	0	0	0	0	0	0	0	0	0	0	0	0	0	0	0	0	0	0	0	0	0	0	0	0	0	0	0	86.661	0	0	0	0	0	0	0	0	0	0	0	0	0	0
	Starchy roots	PHD_RPCequiv			0	0	0	0	0	0	0	0	0	0	0	0	0	0	0	0	0	0	0	0	0	0	0	0	0	0	0	0	0	0	50.3975	0	0	0	0	0	0	0	0	0	0	0	0	0	0
	Starchy roots	PHD_RPCequiv			0	0	0	0	0	0	0	0	0	0	0	0	0	0	0	0	0	0	0	0	0	0	0	0	0	0	0	0	0	0	-36.2635	0	0	0	0	0	0	0	0	0	0	0	0	0	0
					0	0	0	0	0	0	0	0	0	0	0	0	0	0	0	0	0	0	0	0	0	0	0	0	0	0	0	0	0	0	0	0	0	0	0	0	0	0	0	0	0	0	0	0	0
					0	0	0	0	0	0	0	0	0	0	0	0	0	0	0	0	0	0	0	0	0	0	0	0	0	0	0	0	0	0	0	0	0	0	0	0	0	0	0	0	0	0	0	0	0
	Fats & oils	consol		Fats & oils	0	0	0	0	0	0	0	0	0	0	0	0	0	0	0	0	0	0	0	0	0	0	0	0	0	0	0	0	0	0	0	0	1.33056	35.0344	0	11.2385	0	0	0	0	0	0	0	0	0
	Fats & oils	PHD_RPCequiv			0	0	0	0	0	0	0	0	0	0	0	0	0	0	0	0	0	0	0	0	0	0	0	0	0	0	0	0	0	0	0	0	10.0476	0	12.5582	16.4626	0	0	0	0	0	0	0	0	0
	Fats & oils	PHD_RPCequiv			0	0	0	0	0	0	0	0	0	0	0	0	0	0	0	0	0	0	0	0	0	0	0	0	0	0	0	0	0	0	0	0	8.71704	-35.0344	12.5582	5.22408	0	0	0	0	0	0	0	0	0
					0	0	0	0	0	0	0	0	0	0	0	0	0	0	0	0	0	0	0	0	0	0	0	0	0	0	0	0	0	0	0	0	0	0	0	0	0	0	0	0	0	0	0	0	0
					0	0	0	0	0	0	0	0	0	0	0	0	0	0	0	0	0	0	0	0	0	0	0	0	0	0	0	0	0	0	0	0	0	0	0	0	0	0	0	0	0	0	0	0	0
	Dairy products	consol		Dairy products	0	0	0	0	0	0	0	0	0	0	0	0	0	0	0	0	0	0	0	0	0	0	0	0	0	0	0	0	0	0	0	0	0	0	0	0	55.4955	34.3278	40.7502	54.8931	34.6026	70.7292	0	0	0
	Dairy products	PHD_RPCequiv			0	0	0	0	0	0	0	0	0	0	0	0	0	0	0	0	0	0	0	0	0	0	0	0	0	0	0	0	0	0	0	0	0	0	0	0	44.9461	21.6393	0	34.2917	0	14.7897	0	0	0
	Dairy products	PHD_RPCequiv			0	0	0	0	0	0	0	0	0	0	0	0	0	0	0	0	0	0	0	0	0	0	0	0	0	0	0	0	0	0	0	0	0	0	0	0	-10.5494	-12.6885	-40.7502	-20.6014	-34.6026	-55.9395	0	0	0
					0	0	0	0	0	0	0	0	0	0	0	0	0	0	0	0	0	0	0	0	0	0	0	0	0	0	0	0	0	0	0	0	0	0	0	0	0	0	0	0	0	0	0	0	0
					0	0	0	0	0	0	0	0	0	0	0	0	0	0	0	0	0	0	0	0	0	0	0	0	0	0	0	0	0	0	0	0	0	0	0	0	0	0	0	0	0	0	0	0	0
	Egg products	consol		Egg products	0	0	0	0	0	0	0	0	0	0	0	0	0	0	0	0	0	0	0	0	0	0	0	0	0	0	0	0	0	0	0	0	0	0	0	0	0	0	0	0	0	0	0	20.2693	5.81981
	Egg products	PHD_RPCequiv			0	0	0	0	0	0	0	0	0	0	0	0	0	0	0	0	0	0	0	0	0	0	0	0	0	0	0	0	0	0	0	0	0	0	0	0	0	0	0	0	0	0	0	17.3864	0
	Egg products	PHD_RPCequiv			0	0	0	0	0	0	0	0	0	0	0	0	0	0	0	0	0	0	0	0	0	0	0	0	0	0	0	0	0	0	0	0	0	0	0	0	0	0	0	0	0	0	0	-2.88294	-5.81981
					0	0	0	0	0	0	0	0	0	0	0	0	0	0	0	0	0	0	0	0	0	0	0	0	0	0	0	0	0	0	0	0	0	0	0	0	0	0	0	0	0	0	0	0	0
					0	0	0	0	0	0	0	0	0	0	0	0	0	0	0	0	0	0	0	0	0	0	0	0	0	0	0	0	0	0	0	0	0	0	0	0	0	0	0	0	0	0	0	0	0
	Fish products	consol		Fish products	0	0	0	0	0	0	0	0	0	0	0	0	0	0	0	0	0	0	0	0	0	0	0	0	0	0	0	0	0	0	0	0	0	0	0	0	0	0	0	0	0	0	0	0	0
	Fish products	PHD_RPCequiv			0	0	0	0	0	0	0	0	0	0	0	0	0	0	0	0	0	0	0	0	0	0	0	0	0	0	0	0	0	0	0	0	0	0	0	0	0	0	0	0	0	0	0	0	0
	Fish products	PHD_RPCequiv			0	0	0	0	0	0	0	0	0	0	0	0	0	0	0	0	0	0	0	0	0	0	0	0	0	0	0	0	0	0	0	0	0	0	0	0	0	0	0	0	0	0	0	0	0
					0	0	0	0	0	0	0	0	0	0	0	0	0	0	0	0	0	0	0	0	0	0	0	0	0	0	0	0	0	0	0	0	0	0	0	0	0	0	0	0	0	0	0	0	0
					0	0	0	0	0	0	0	0	0	0	0	0	0	0	0	0	0	0	0	0	0	0	0	0	0	0	0	0	0	0	0	0	0	0	0	0	0	0	0	0	0	0	0	0	0
	Meat products	consol		Meat products	0	0	0	0	0	0	0	0	0	0	0	0	0	0	0	0	0	0	0	0	0	0	0	0	0	0	0	0	0	0	0	0	0	0	0	0	0	0	0	0	0	0	0	0	0
	Meat products	PHD_RPCequiv			0	0	0	0	0	0	0	0	0	0	0	0	0	0	0	0	0	0	0	0	0	0	0	0	0	0	0	0	0	0	0	0	0	0	0	0	0	0	0	0	0	0	0	0	0
	Meat products	PHD_RPCequiv			0	0	0	0	0	0	0	0	0	0	0	0	0	0	0	0	0	0	0	0	0	0	0	0	0	0	0	0	0	0	0	0	0	0	0	0	0	0	0	0	0	0	0	0	0
					0	0	0	0	0	0	0	0	0	0	0	0	0	0	0	0	0	0	0	0	0	0	0	0	0	0	0	0	0	0	0	0	0	0	0	0	0	0	0	0	0	0	0	0	0
					0	0	0	0	0	0	0	0	0	0	0	0	0	0	0	0	0	0	0	0	0	0	0	0	0	0	0	0	0	0	0	0	0	0	0	0	0	0	0	0	0	0	0	0	0
	Other foods	consol		Other foods	0	0	0	0	0	0	0	0	0	0	0	0	0	0	0	0	0	0	0	0	0	0	0	0	0	0	0	0	0	0	0	0	0	0	0	0	0	0	0	0	0	0	0	0	0
	Other foods	PHD_RPCequiv			0	0	0	0	0	0	0	0	0	0	0	0	0	0	0	0	0	0	0	0	0	0	0	0	0	0	0	0	0	0	0	0	0	0	0	0	0	0	0	0	0	0	0	0	0
	Other foods	PHD_RPCequiv			0	0	0	0	0	0	0	0	0	0	0	0	0	0	0	0	0	0	0	0	0	0	0	0	0	0	0	0	0	0	0	0	0	0	0	0	0	0	0	0	0	0	0	0	0
					0	0	0	0	0	0	0	0	0	0	0	0	0	0	0	0	0	0	0	0	0	0	0	0	0	0	0	0	0	0	0	0	0	0	0	0	0	0	0	0	0	0	0	0	0
					0	0	0	0	0	0	0	0	0	0	0	0	0	0	0	0	0	0	0	0	0	0	0	0	0	0	0	0	0	0	0	0	0	0	0	0	0	0	0	0	0	0	0	0	0
[truncated: 18 more columns]

## Sheet: T SI-1 665 raw products
raw product	process
Acidophilus milk	modelled_in_capri
Alcohol 90 - 95	Processed
Alfalfa spouts, fresh (Medicago sativa)	Unspecified
Allspice (Pimenta dioica)	Drying_grinding
Almond, bitter (Prunus amygalus amara)	Unspecified
Almond, sweet (Prunus amygalus dulcis)	Grinding
Almond, sweet (Prunus amygalus dulcis)	Unspecified
Anchovy (Engraulis)	Unspecified
Anchovy (Engraulis)	Canning/jarring
Anise seed (Pimpinella anisum)	Drying_grinding
Apple (Malus domesticus)	Juicing_dehydration
Apple (Malus domesticus)	Unspecified
Apple (Malus domesticus)	Cooking
Apple (Malus domesticus)	Pulping/mashing
Apricots (Prunus armeniaca)	Unspecified
Apricots (Prunus armeniaca)	Cooking
Asparagus (Asparagus officinalis)	Unspecified
Aspartam	Processed
Aubergines (egg plants) (Solanum melongena)	Unspecified
Avocados (Persea americana)	Unspecified
Bamboo shoots (Bambusa vulgaris)	Unspecified
Bananas (Musa x paradisica)	Unspecified
Bananas (Musa x paradisica)	Pulping/mashing
Barley flakes	Flaking
Barley flour	grain_milling
Barley grain, whole	Cookinginwater
Barley grain, whole	Toasting_grinding
Barley grain, whole	Flattening/rolling
Barley grain, whole	Distillation
Barley, pearled	Polishing
Basil, dried	Drying_grinding
Basil, herb (Ocimum basilicum)	Unspecified
Bay leaves (laurel) (Laurus nobilis)	Drying_grinding
Bay leaves (laurel) (Laurus nobilis)	Unspecified
Bean sprout	Unspecified
Beans (dry), soaked/boiled/canned	Cookinginwater
Beans (Phaseolus vulgaris)	Unspecified
Beans, green, without pods (Phaseolus vulgaris)	Unspecified
Beans, with pods (Phaseolus vulgaris)	Cookinginwater
Beans, with pods (Phaseolus vulgaris)	Unspecified
Beans, with pods (Phaseolus vulgaris)	Cooking
Beef kidney	Unspecified
Beef liver	Unspecified
Beef muscle	Unspecified
Beef muscle, cooked	Cookinginwater
Beef muscle, cured	Curing
Beef muscle, dried	Drying
Beef muscle, extract	Extraction
Beef muscle, stewed	Stewing
Beet leaves (Beta vulgaris)	Unspecified
Beetroot (Beta vulgaris subsp. vulgaris)	Unspecified
Bilberry or whortleberry (Vaccinium spp.)	Unspecified
Blackberries (Rubus fruticosus)	Unspecified
Blackberries (Rubus fruticosus)	Cooking
Blood (beef), cooked	Cookinginwater
Blood (pork), cooked	Cookinginwater
Blueberries (Vaccinium corymbosum)	Drying
Blueberries (Vaccinium corymbosum)	Cooking
Boar meat (wild pig) (Sus scrofa)	Unspecified
Boletus (Boletus (and other) spp.)	Unspecified
Borage (Borago officinalis)	Unspecified
Bottled water	Unspecified
Brain (sheep)	Unspecified
Brandy	Distillation
Brazil nuts (Bertholletia excelsa)	Unspecified
Bream (Charax)	Unspecified
Broad bean (Vicia faba)	Unspecified
Broccoli (Brassica oleracea var. italica)	Frying
Broccoli (Brassica oleracea var. italica)	Unspecified
Broccoli (Brassica oleracea var. italica)	Cooking
Brown sugar	modelled_in_capri
Brussels sprouts (Brassica oleracea var. gemmifera)	Unspecified
Buckwheat flour	grain_milling
Buckwheat grain	Grinding
Buckwheat grain	Flattening/rolling
Buckwheat grain	Unspecified
Butter	modelled_in_capri
Butter oil	modelled_in_capri
Buttermilk	modelled_in_capri
Cane sugar	modelled_in_capri
Cantharelle (Cantharellus cibarius)	Unspecified
Capers (Capparis spinosa)	Unspecified
Carambola (Averrhoa carambola)	Unspecified
Caraway (Carum carvi)	Drying_grinding
Carbohydrate-electrolyte solutions for sports people	Processed
Carbonated mineral water	processed3
Cardamom (Elettaria cardamomum)	Drying_grinding
Carp (Cyprinus)	Unspecified
Carrots (Daucus carota)	Cookinginwater
Carrots (Daucus carota)	Cookinginwater,Pulping/mashing
Carrots (Daucus carota)	Stewing
Carrots (Daucus carota)	Frying
Carrots (Daucus carota)	Extraction
Carrots (Daucus carota)	Unspecified
Carrots (Daucus carota)	Cooking
Cashew nuts (Anacardium occidentale)	Unspecified
Cauliflower (Brassica oleracea var. botrytis)	Unspecified
Cauliflower (Brassica oleracea var. botrytis)	Cooking
Cayenne pepper (Capsicum frutescens)	Processed
Celeriac (Apium graveolens var. rapaceum)	Unspecified
Celery (Apium graveolens var. dulce)	Cookinginwater
Celery (Apium graveolens var. dulce)	Cookinginwater,Pulping/mashing
Celery (Apium graveolens var. dulce)	Stewing
Celery (Apium graveolens var. dulce)	Unspecified
Cheese, Appenzeller	modelled_in_capri
Cheese, Bavarian Blue	modelled_in_capri
Cheese, Boursin	modelled_in_capri
Cheese, Brie	modelled_in_capri
Cheese, Buche de Chevre	modelled_in_capri
Cheese, Butterkase	modelled_in_capri
Cheese, Camembert	modelled_in_capri
Cheese, Cheddar	modelled_in_capri
Cheese, Cheshire	modelled_in_capri
Cheese, Comte	modelled_in_capri
Cheese, Cottage	modelled_in_capri
Cheese, Cream Havarti	modelled_in_capri
Cheese, Danbo	modelled_in_capri
Cheese, Edam	modelled_in_capri
Cheese, Emmental	modelled_in_capri
Cheese, Esrom	modelled_in_capri
Cheese, Feta	modelled_in_capri
Cheese, Gorgonzola	modelled_in_capri
Cheese, Gouda	modelled_in_capri
Cheese, Grana Padano	modelled_in_capri
Cheese, Gruyere	modelled_in_capri
Cheese, Harzer	modelled_in_capri
Cheese, Limburger	modelled_in_capri
Cheese, Maasdam	modelled_in_capri
Cheese, Mascarpone	modelled_in_capri
Cheese, Mozzarella	modelled_in_capri
Cheese, Parmigiano Reggiano	modelled_in_capri
Cheese, Pecorino Romano	modelled_in_capri
Cheese, processed cheese, plain	modelled_in_capri
Cheese, processed spreadable	modelled_in_capri
Cheese, processed, sliceable	modelled_in_capri
Cheese, Raclette	modelled_in_capri
Cheese, Ricotta	modelled_in_capri
Cheese, Roquefort	modelled_in_capri
Cheese, Tilsit	modelled_in_capri
Cheese, Trappist	modelled_in_capri
Cheese, White Stilton	modelled_in_capri
Cherimoya (Annona cherimola)	Unspecified
Chervil, herb (Anthriscus cerefolium)	Drying_grinding
Chervil, herb (Anthriscus cerefolium)	Unspecified
Chestnuts (Castanea sativa)	Unspecified
Chestnuts (Castanea sativa)	Pulping/mashing
Chick pea (Cicer arietinum)	Cookinginwater
Chick pea (Cicer arietinum)	Unspecified
Chicken fat	Unspecified
Chicken liver	Unspecified
Chicken liver, cooked	Cookinginwater
Chicken muscle	Unspecified
Chicken muscle, cooked	Cookinginwater
Chicken muscle, extract	Extraction
Chicken muscle, roasted	Roasting
Chicken muscle, stewed	Stewing
Chicory roots (Cichorium intybus)	Toasting_grinding
Chicory roots (Cichorium intybus)	Unspecified
Chilli pepper (Capsicum frutescens)	Unspecified
Chilli powder	Drying_grinding
Chinese cabbage (Brassica pekinensis)	Unspecified
Chives, bulb (Allium schoenoprasum)	Processed
Chives, herb (Allium schoenoprasum)	Drying_grinding
Chives, herb (Allium schoenoprasum)	Unspecified
Cider	Winemaking
Cinnamon (Cinnamonum verum syn. C. zeylanicum)	Drying_grinding
Citric acid	Processed
Clam (Mya arenaria)	Unspecified
Cloves (Syzygium aromaticum)	Drying_grinding
Coalfish (Pollachius virens)	Unspecified
Cocoa butter	Toasting_grinding_vegoil
Cocoa mass	Toasting_grinding
Cocoa powder	Toasting_grinding_cocoaoil
Coconut milk (Cocos nucifera)	Extraction
Coconut oil	modelled_in_capri
Coconuts (Cocos nucifera)	Grinding
Coconuts (Cocos nucifera)	Unspecified
Cod (Gadus morhua)	Cookinginwater
Cod (Gadus morhua)	Frying
Cod (Gadus morhua)	Unspecified
Cod (Gadus morhua)	Oilproduction,Liver
Coffee beans	Extraction
Coffee beans, roasted and ground	Toasting_grinding
Coffee cream 10 % fat	modelled_in_capri
Common wheat grain	Flattening/rolling
Common wheat grain	Puffing/expanding
Common wheat grain	Distillation
Common wheat grain	Starchproduction
Condensed milk 10 % fat	modelled_in_capri
Condensed milk 4% fat	modelled_in_capri
Coriander leaves	Drying_grinding
Coriander leaves	Unspecified
Coriander seed (Coriandrum sativum)	Drying_grinding
Corn flakes	Flaking
Corn flour	grain_milling
Corn grain	Puffing/expanding
Corn grain	Distillation
Corn grain	Unspecified
Corn starch	Starchproduction
Corn syrup	modelled_in_capri
Courgettes (Zucchini) (Cucurbita pepo var. melopepo)	Cookinginwater
Courgettes (Zucchini) (Cucurbita pepo var. melopepo)	Broiling/grilling
Courgettes (Zucchini) (Cucurbita pepo var. melopepo)	Unspecified
Cow milk, 1 - 2.9% fat (semi-skimmed milk)	modelled_in_capri
Cow milk, 3 - 4% fat (whole milk)	modelled_in_capri
Cow milk, < 1% fat (skimmed milk)	modelled_in_capri
Cow milk, > 4% fat (inc. Channel Island milk)	modelled_in_capri
Crab (Cancer spp.)	Unspecified
Crawfish (Panulirus spp.)	Unspecified
Crayfish (Astacus spp.)	Unspecified
Cream 10% fat	modelled_in_capri
Cream 20% fat	modelled_in_capri
Cream 30 % fat	modelled_in_capri
Cream 40 % fat	modelled_in_capri
Cream powder	modelled_in_capri
Cress (Lepidium sativum)	Unspecified
Cr�me fra�che, 30% fat	modelled_in_capri
Cr�me fra�che, >30% fat	modelled_in_capri
Cucumbers (Cucumis sativus)	Unspecified
Cultivated mushroom (syn. Button mushroom) (Agaricus bisporus)	Cookinginwater
Cultivated mushroom (syn. Button mushroom) (Agaricus bisporus)	Stewing
Cultivated mushroom (syn. Button mushroom) (Agaricus bisporus)	Frying
Cultivated mushroom (syn. Button mushroom) (Agaricus bisporus)	Broiling/grilling
Cultivated mushroom (syn. Button mushroom) (Agaricus bisporus)	Unspecified
Cultivated mushroom (syn. Button mushroom) (Agaricus bisporus)	Cooking
Cumin seed (Cuminum cyminum)	Drying_grinding
Currants (red, black and white) (Ribes nigrum, Ribes rubrum)	Unspecified
Currants (red, black and white) (Ribes nigrum, Ribes rubrum)	Cooking
Cuttlefish (Sepia officinalis)	Cookinginwater
Cuttlefish (Sepia officinalis)	Unspecified
Dandelion leaf (Taraxacum officinalis)	Unspecified
Dates (Phoenix dactylifera)	Unspecified
Dill, herb (Anethum graveolens)	Drying_grinding
Dill, herb (Anethum graveolens)	Unspecified
Dried apples (Malus domesticus)	Drying
Dried apricots (Prunus armeniaca)	Drying
Dried bananas (Musa x paradisica)	Drying
Dried dates (Phoenix dactylifera)	Drying
Dried figs (Ficus carica)	Drying
Dried vine fruits (currants, raisins and sultanas)	Drying
Drinking water (water without any additives except carbon dioxi	Unspecified
Duck muscle	Unspecified
Eels (Apodes)	Unspecified
Egg white, chicken	Partitioning_egg
Egg yolk, chicken	Partitioning_egg
Elderberries (Sambucus nigra)	Unspecified
Endive, scarole (broad-leaf endive) (Cichorium endiva)	Unspecified
Evaporated milk (milk evaporated down to less than a half of it	modelled_in_capri
Fennel (Foeniculum vulgare)	Unspecified
Fennel seed (Foeniculum vulgare)	Drying_grinding
Fenugreek (Trigonella foenumgraecum)	Drying_grinding
Figs (Ficus carica)	Unspecified
Filmj�lk	modelled_in_capri
Fish roe, Cod	Partitioning_slaughter
Fish roe, Lumpfish	Partitioning_slaughter
Flounder (Platichthys flesus)	Unspecified
Food for weight reduction	Processed
Frog legs (Rana spp.)	Unspecified
Fruit pur�e for children	Processed
Garlic, bulb (Allium sativum)	Unspecified
Garlic, bulb (Allium sativum)	Cooking
Garlic, dried	Drying_grinding
Gelatine	Processed
Gherkins (Cucumis sativus)	Pickling
Giblet (chicken)	Unspecified
Ginger (Zingiber officinale)	Unspecified
Ginger, dried	Drying_grinding
Globe artichokes (Cynara scolymus)	Unspecified
Goat milk	modelled_in_capri
Goose fat	Unspecified
Goose liver	Unspecified
Goose liver, cooked	Cookinginwater
Goose muscle	Unspecified
Goose muscle, cooked	Cookinginwater
Gooseberries (Ribes uva-crispa)	Unspecified
Grapefruit (Citrus paradisi)	Unspecified
Greengage (Prunus domestica var italica)	Unspecified
Grey mullet (Mugil)	Unspecified
Gum	Processed
Haddock (Melanogrammus aeglefinus)	Unspecified
Hake (Merluccius)	Unspecified
Halibut (Hippoglossus spp.)	Unspecified
Hare meat (Lepus europaeus)	Unspecified
Hazelnuts (Corylus avellana)	Grinding
Hazelnuts (Corylus avellana)	Unspecified
Head cabbage (Brassica oleracea convar. capitata)	Juicing
Head cabbage (Brassica oleracea convar. capitata)	Unspecified
Herring (Clupea)	Cookinginwater
Herring (Clupea)	Unspecified
Herring (Clupea)	Canning/jarring
Honey	Unspecified
Honey mushroom (Armillaria mellea)	Unspecified
Hops (dried), including hop pellets and unconcentrated powder (	Unspecified
Horse, asses, mules or hinnies meat (Equus spp.)	Unspecified
Horseradish (Armoracia rusticana)	Unspecified
Hydrogenated starch hydrolysates	Processed
Iceberg-type lettuce	Unspecified
Instant coffee, powder	processed4
Jerusalem artichokes tubers (Helianthus tuberosus)	Unspecified
Juice concentrate, Apple	Juicing_concentrate
Juice concentrate, Gooseberries	Juicing_concentrate
Juice concentrate, Lemon	Juicing_concentrate
Juice concentrate, Mandarins	Juicing_concentrate
Juice concentrate, Mango	Juicing_concentrate
Juice concentrate, Oranges	Juicing_concentrate
Juice concentrate, Passion fruit	Juicing_concentrate
Juice concentrate, Peaches	Juicing_concentrate
Juice concentrate, Pear	Juicing_concentrate
Juice concentrate, Plums	Juicing_concentrate
Juice concentrate, Sweet cherry	Juicing_concentrate
Juice, apple	Juicing
Juice, Apricot	Juicing
Juice, beetroot	Juicing
Juice, Blackcurrant	Juicing
Juice, Blueberry	Juicing
Juice, carrot	Juicing
Juice, celery	Juicing
Juice, elderberry	Juicing
Juice, grape	Juicing
Juice, grapefruit	Juicing
Juice, Guava	Juicing
Juice, kiwi	Juicing
Juice, lemon	Juicing
Juice, Lime	Juicing
Juice, Mandarin	Juicing
Juice, orange	Juicing
Juice, Passion fruit	Juicing
Juice, pear	Juicing
Juice, pineapple	Juicing
Juice, Redcurrant	Juicing
Juice, Strawberry	Juicing
Juice, tomato	Juicing
Juniper berries (Juniperus communis)	Drying_grinding
Kale (Brassica oleracea convar. Acephalea)	Unspecified
Kefir	modelled_in_capri
Kiwi (Actinidia deliciosa syn. A. chinensis)	Unspecified
Kohlrabi (Brassica oleracea convar. acephala, var. gongylodes)	Unspecified
Kombu (Laminaria spp.)	Unspecified
Lactose	Processed
Lamb's lettuce (Valerianella locusta)	Unspecified
Leek (Allium porrum)	Unspecified
Leek (Allium porrum)	Cooking
Lemon essence	Extraction
Lemons (Citrus limon)	Unspecified
Lemons (Citrus limon)	Partitioning_peel
Lentils (dry), soaked/boiled/canned	Cookinginwater
Lentils (Lens culinaris syn. L. esculenta)	Unspecified
Lettuce, excluding Iceberg-type lettuce (Lactuca sativa)	Unspecified
Limes (Citrus aurantifolia)	Unspecified
Lingonberry (Vaccinium vitis-idaea)	Cooking
Linseed (Linum usitatissimum)	Unspecified
Linseed oil	modelled_in_capri
Lobster (Homarus vulgaris)	Unspecified
Lovage leaves	Unspecified
Lychee (Litchi) (Litchi chinensis)	Unspecified
Macadamia (Macadamia ternifolia)	Unspecified
Mace (Myristica fragrans)	Drying_grinding
Mackeral (Scomber)	Cookinginwater
Mackeral (Scomber)	Unspecified
Mackeral (Scomber)	Canning/jarring
Main-crop potatoes	Cookinginwater
Main-crop potatoes	Cookinginwater,Pulping/mashing
Main-crop potatoes	Stewing
Main-crop potatoes	Frying
Main-crop potatoes	Frying,cutting
Main-crop potatoes	Deepfrying,Slicing
Main-crop potatoes	Roasting
Main-crop potatoes	Distillation
Main-crop potatoes	Unspecified
Maize oil, edible	modelled_in_capri
Malt extract	Malting,Extraction
Malted barley	Malting
Mandarins (Citrus reticulata)	Unspecified
Mandarins (Citrus reticulata)	Cooking_with_peel
Mangoes (Mangifera indica)	Drying
Mangoes (Mangifera indica)	Juicing_dehydration
Mangoes (Mangifera indica)	Unspecified
Mangoes (Mangifera indica)	Partitioning_peel
Mangoes (Mangifera indica)	Pulping/mashing
Maple syrup	modelled_in_capri
Marjoram	Drying_grinding
Marrowbone (beef)	Unspecified
Mashed potato powder	Drying_grinding
Melons (Cucumis melo)	Unspecified
Milk powder, skimmed	modelled_in_capri
Milk powder, whole	modelled_in_capri
Milk protein	Processed
Millet grain	Grinding
Millet grain	Unspecified
Mint	Drying_grinding
Mint	Unspecified
Mirabelle (Prunus domestica var syriaca)	Unspecified
Molasses	modelled_in_capri
Morel (Morchella esculanta)	Unspecified
Mung bean (Phaseolus aureus)	Unspecified
Mussel (Mytilus edulis)	Cookinginwater
Mussel (Mytilus edulis)	Unspecified
Mussel (Mytilus edulis)	Canning/jarring
Mustard seed (Brassica nigra)	Grinding
Mustard seed (Brassica nigra)	Unspecified
Mutton / lamb meat (Ovis aries)	Partitioning_slaughter
Nettle (Urtica dioica)	Unspecified
Nutmeg (Myristica fragans)	Drying_grinding
Nutritive sweeteners (e.g., sorbitol, manitol)	Processed
Oat bran	Processed
Oat flakes	Flattening/rolling
Oat flour	grain_milling
Oats, grain	Grinding
Oats, grain	Puffing/expanding
Oats, grain	Unspecified
Olive oil	modelled_in_capri
Onions, bulb (Allium cepa)	Cookinginwater
Onions, bulb (Allium cepa)	Stewing
Onions, bulb (Allium cepa)	Frying
Onions, bulb (Allium cepa)	Unspecified
Onions, bulb (Allium cepa)	Cooking
Onions, dried	Drying_grinding
Orange essence	Extraction
Oranges (Citrus sinensis)	Juicing_dehydration
Oranges (Citrus sinensis)	Unspecified
Oranges (Citrus sinensis)	Partitioning_peel
Origano	Unspecified
Origano, dried	Drying_grinding
Ostrich meat (Struthio camelus)	Unspecified
Oyster (Ostrea edulis)	Unspecified
Oyster mushroom (Pleurotus ostreatus)	Unspecified
Palm oil	modelled_in_capri
Papaya (Carica papaya)	Unspecified
Paprika powder	Drying_grinding
Parsley, herb (Petroselinum crispum)	Drying_grinding
Parsley, herb (Petroselinum crispum)	Unspecified
Parsnips (Pastinaca sativa)	Unspecified
Passion fruit (Passiflora edulis)	Unspecified
Pawpaw (Asimina)	Unspecified
Peaches (Prunus persica)	Unspecified
Peaches (Prunus persica)	Cooking
Peaches (Prunus persica)	Canning/jarring
Peanut (Arachis hypogea)	Unspecified
Peanut (Arachis hypogea)	Pulping/mashing
Peanut oil	modelled_in_capri
Pear (Pyrus communis)	Drying
Pear (Pyrus communis)	Cooking
Pear (Pyrus communis)	Canning/jarring
Peas (dry), soaked/boiled/canned	Cookinginwater
Peas, green, without pods (Pisum sativum)	Cookinginwater
Peas, green, without pods (Pisum sativum)	Cookinginwater,Pulping/mashing
Peas, green, without pods (Pisum sativum)	Frying
Peas, green, without pods (Pisum sativum)	Unspecified
Peas, with pods (Pisum sativum)	Frying
Peas, with pods (Pisum sativum)	Unspecified
Pecans (Carya illinoensis)	Unspecified
Pepper, black and white (Piper nigrum)	Drying_grinding
Peppermint (Mentha x piperita)	Drying
Peppers, paprika (Capsicum annuum, var. grossum and var. longum	Frying
Peppers, paprika (Capsicum annuum, var. grossum and var. longum	Broiling/grilling
Peppers, paprika (Capsicum annuum, var. grossum and var. longum	Unspecified
Peppers, paprika (Capsicum annuum, var. grossum and var. longum	Cooking
Perch (Perca)	Unspecified
Persimmon (Sharon fruit) (Diospyros kaki)	Unspecified
Pheasant meat (Phasianus colchius)	Unspecified
Physalis (Physalis peruviana)	Unspecified
Pigeon meat (Columba spp.)	Unspecified
Pine nuts (Pinus pinea)	Unspecified
Pineapples (Ananas comosus)	Juicing_dehydration
Pineapples (Ananas comosus)	Unspecified
Pineapples (Ananas comosus)	Partitioning_peel
Pineapples (Ananas comosus)	Cooking
Pineapples (Ananas comosus)	Canning/jarring
Pistachios (Pistachia vera)	Unspecified
Plaice (Pleuronectes)	Unspecified
Plums (Prunus domestica)	Drying
Plums (Prunus domestica)	Distillation
Plums (Prunus domestica)	Unspecified
Plums (Prunus domestica)	Cooking
Pomegranate (Punica granatum)	Unspecified
Pomelo (Citrus grandis)	Unspecified
Poppy seed (Papaver somniferum)	Unspecified
Pork kidney	Unspecified
Pork lard (Schmaltz)	Unspecified
Pork liver	Unspecified
Pork liver, cooked	Cookinginwater
Pork muscle	Unspecified
Pork muscle, cooked	Cookinginwater
Pork muscle, cured	Curing
Pork muscle, roasted	Roasting
Pork muscle, stewed	Stewing
Potato flakes	Flaking
Potato starch	Starchproduction
Prawns (Palaemon serratus)	Unspecified
Prawns (Palaemon serratus)	Canning/jarring
Prickly pear (cactus fruit) (Opuntia ficus-indica)	Unspecified
Protein and protein components for sports people	Processed
Pumpkin seed oil	modelled_in_capri
Pumpkin seeds (Cucurbita pepo var. oleifera)	Unspecified
Pumpkins (Cucurbita maxima)	Unspecified
Quail meat (Coturnix coturnix)	Unspecified
Quark	modelled_in_capri
Quince (Cydonia oblonga)	Unspecified
Quinine essence	Processed
Rabbit meat (Lepus cuniculus)	Unspecified
Radishes (Raphanus sativus var. sativus)	Unspecified
Rapeseed oil	modelled_in_capri
Raspberries (Rubus idaeus)	Drying
Raspberries (Rubus idaeus)	Unspecified
Raspberries (Rubus idaeus)	Cooking
Reindeer meat (Rangifer tarandus)	Partitioning_slaughter
Rhubarb (Rheum x hybridum)	Unspecified
Rhubarb (Rheum x hybridum)	Cooking
Rice flour	grain_milling
Rice, cooked, polished	Polishing,Cookinginwater
Rice, popped	Puffing/expanding
Rice, white	Polishing
Rice, wild	Cookinginwater
Rose hips (Rosa canina)	Cooking
Rosemary, herb (Rosmarinus officinalis)	Drying_grinding
Rosemary, herb (Rosmarinus officinalis)	Unspecified
Rum	Distillation
Rye flour, light	fine_milling
Rye flour, medium	semi_refined_milling
Rye flour, wholemeal	integral_milling
Rye grain	Toasting_grinding
Rye grain	Grinding
Rye grain	Flaking
Rye grain	Flattening/rolling
Rye grain	Distillation
Rye grain	Unspecified
Rye grain	fine_milling
Saccharine	Processed
Sage, dried	Drying_grinding
Sage, herb (Salvia officinalis)	Unspecified
Salmon (Salmo salar)	Cookinginwater
Salmon (Salmo salar)	Unspecified
Salmon (Salmo salar)	Canning/jarring
Salsify (Tragopogon porrifolius)	Unspecified
Salt	Unspecified
Salt, iodised	Unspecified
Salt, iodised and fluoridated	Unspecified
Sardinops (Sardinops sagax)	Unspecified
Sardinops (Sardinops sagax)	Canning/jarring
Sauerkraut	Fermentation
Scallop (Pecten spp.)	Cookinginwater
Scallop (Pecten spp.)	Unspecified
Sesam paste (Tahini) (Sesamus indicum)	Pulping/mashing
Sesame seed (Sesamum indicum syn. S. orientale)	Unspecified
Shallots, bulb (Allium ascalonicum, Allium cepa var. aggregatum	Frying
Shallots, bulb (Allium ascalonicum, Allium cepa var. aggregatum	Unspecified
Sheep milk	modelled_in_capri
Sheep muscle, roasted	Roasting
Shiitake mushroom (Lentinus edodes)	Unspecified
Shrimps (Crangon crangon)	Cookinginwater
Shrimps (Crangon crangon)	Unspecified
Shrimps (Crangon crangon)	Canning/jarring
Skin (pork)	Unspecified
Snail (Helix sp.)	Unspecified
Sodium bicarbonate	Processed
Sole (Limanda; Solea)	Unspecified
Sorrel (Rumex spp.)	Unspecified
Sour cherry (Prunus cerasus)	Unspecified
Sour cherry (Prunus cerasus)	Cooking
Sour cream 10 % fat	modelled_in_capri
Sour cream 12% fat	modelled_in_capri
Sour cream 20 % fat	modelled_in_capri
Sour cream 40 % fat	modelled_in_capri
Soya beans (Glycine max)	Unspecified
Soya beans (Glycine max)	Fermentation
Soya beans flour	Oilproduction,Vegetable
Soybean oil	modelled_in_capri
Spelt flour, wholemeal	integral_milling
Spelt grain	Unspecified
Spinach (fresh) (Spinacia oleracea)	Cookinginwater
Spinach (fresh) (Spinacia oleracea)	Unspecified
Sprat (Sprattus sprattus)	Unspecified
Sprat (Sprattus sprattus)	Canning/jarring
Spring onions, bulb (Allium cepa)	Cookinginwater
Spring onions, bulb (Allium cepa)	Frying
Spring onions, bulb (Allium cepa)	Unspecified
Squid (Loligo vulgaris)	Unspecified
Still mineral water	processed2
Stomach (beef)	Unspecified
Strawberries (Fragaria x ananassa)	Drying
Strawberries (Fragaria x ananassa)	Unspecified
Strawberries (Fragaria x ananassa)	Cooking
Sucralose	Processed
Sugar beet syrup	modelled_in_capri
Sun-dried tomatoes	Drying
Sunflower oil	modelled_in_capri
Sunflower seed (Helianthus annuus)	Unspecified
Swedes (Brassica napus var. napobrassica)	Unspecified
Sweet cherry (Prunus avium)	Unspecified
Sweet cherry (Prunus avium)	Cooking
Sweet cherry (Prunus avium)	Canning/jarring
Sweet corn (Zea mays var. saccharata)	Cookinginwater
Sweet corn (Zea mays var. saccharata)	Frying
Sweet corn (Zea mays var. saccharata)	Unspecified
Sweet potatoes (Ipomoea batatas)	Unspecified
Table grapes (Vitis euvitis)	Unspecified
Table grapes (Vitis euvitis)	Canning/jarring
Table olives (Olea europaea)	Unspecified
Tail (beef)	Unspecified
Tallow	Unspecified
Tap water	Unspecified
Tapioca	Starchproduction
Tea (dried leaves and stalks, fermented or otherwise of Camelli	Extraction
Tea (dried leaves and stalks, fermented or otherwise of Camelli	Unspecified
Thyme, dried	Drying_grinding
Thyme, herb (Thymus spp.)	Unspecified
Tomato pur�e	Pulping/mashing
Tomato, canned	Canning/jarring
Tomato, paste	Pulping/mashing,Concentration/evaporation
Tomatoes (Lycopersicum esculentum)	Unspecified
Tomatoes (Lycopersicum esculentum)	Cooking
Tongue (beef)	Unspecified
Tongue (pork)	Unspecified
Trotters (pork)	Unspecified
Trout (Oncorhynchus mykiss)	Unspecified
Truffle (Tuber spp.)	Unspecified
Tuna (Thunnus)	Cookinginwater
Tuna (Thunnus)	Unspecified
Tuna (Thunnus)	Canning/jarring
Turkey liver	Unspecified
Turkey muscle	Unspecified
Turkey muscle, cooked	Cookinginwater
Turmeric (Curcuma) (Curcuma domestica syn. C. longa)	Drying_grinding
Turnips (Brassica rapa)	Unspecified
Vanilla essence	Extraction
Vanilla pods (Vanilla fragrans syn. Vanilla planifolia)	Drying
Veal fat tissue	Unspecified
Veal liver	Unspecified
Veal liver, cooked	Cookinginwater
Veal muscle	Unspecified
Veal muscle, cooked	Cookinginwater
Venison meat (Cervus spp.)	Unspecified
Vine leaves (grape leaves) (Vitis euvitis)	Unspecified
Vinegar, wine	Bacteriafermentation
Walnut oil	modelled_in_capri
Walnuts (Juglans regia)	Unspecified
Water ice (for consumption)	processed2
Watermelons (Citrullus lanatus)	Unspecified
Wheat bran	fine_milling
Wheat flakes	Flaking
Wheat flour, brown	semi_refined_milling
Wheat flour, white	fine_milling
Wheat flour, wholemeal	integral_milling
Wheat germ	fine_milling
Wheat germ oil	modelled_in_capri
Wheat grain, Durum	Grinding
Wheat semolina, Durum	semolina_milling
Wheat semolina, soft wheat	semolina_milling
Whey powder	modelled_in_capri
Whey, plain	modelled_in_capri
White sugar	modelled_in_capri
Whiting (Merlangius merlangus)	Unspecified
Whole egg, chicken	Cookinginwater
Whole egg, chicken	Frying
Whole egg, chicken	Drying
Whole egg, chicken	drying_egg
Whole egg, chicken	Unspecified
Wine, red	modelled_in_capri
Wine, white	modelled_in_capri
Winter savory	Drying_grinding
Witloof (Cichorium intybus. var. foliosum)	Unspecified
Yeast	Unspecified
Yeast extract	Extraction
Yoghurt, cow milk, 1 - 3% fat	modelled_in_capri
Yoghurt, cow milk, > 3% fat	modelled_in_capri

## Sheet: T SI-2 879 foods
Food
Additional bread products
Aioli or garlic sauce
Alcoholic beverages
Alcoholic sweet sauce
Alcopop and flavoured wine
Alfalfa sprouts
Algae and prokaryotes organisms
Almonds sweet
Anchovies
Animal and vegetable fats/oils
Animal edible offal, non-muscle, other than liver and kidney
Animal fats and oils (processed fat from animal tissue)
Animal kidney
Animal liver
Apple strudel
Apricots
Aromatic herbs
Asparagus
Aubergines
Avocados
Bacon
Baking yeast
Bamboo shoots
Bananas and similar-
Barbecue or steak sauces
Barley grain, pearled
Basil
Basil, dry
Baumkuchen and similar
Bay leaves, dry
Bechamel sauce
Beef liver
Beefsteak tomato
Beer
Beer and beer-like beverage
Beer, alcohol-free
Beer, light
Beer, regular
Beer, strong
Beer-like beverages
Beerwurst
Beetroots
Beignets
Berries and small fruits
Bilberries (generic)
Biscuit with inclusions, filling or coating
Biscuits
Biscuits, chocolate
Biscuits, sweet, plain
Biscuits, sweet, wheat wholemeal
Bitter chocolate
Black radishes
Blackberries
Blackcurrants
Blended frying oil/fats
Blended margarine
Blood-type sausage
Bockwurst
Boiled eggs
Borage
Borlotti or other common beans (dry)
Borlotti or other common beans (without pods)
Bottled water
Bovine and pig, minced meat
Bovine edible offal, non-muscle, other than liver and kidney
Bovine meat, dried
Bovine tail
Bovine tongue
Bovine, minced meat
Brandy
Brazil nuts
Bread and rolls with special ingredients added
Breadcrumbs
Brioche type products
Broad beans (with pods)
Broad beans (without pods)
Broccoli
Brown beet sugar
Brown sugar
Brussels sprouts
Buckwheat
Buckwheat flour
Buckwheat groats
Butter
Butter and margarine/oil blends
Butter biscuits
Butter oil
Butter sauce
Buttermilk
Cake marbled, with chocolate
Cake pre-mixes/batter
Calf fresh meat
Candied fruits
Candied or sugar preserved nuts
Candies (soft and hard)
Canned anchovies
Canned mackerel
Canned meat
Canned mushrooms
Canned or jarred chickpea
Canned or jarred common beans
Canned or jarred fruit
Canned or jarred legumes
Canned or jarred lentils
Canned or jarred peas
Canned salmon
Canned sardines
Canned seafood
Canned sprats
Canned starchy root products
Canned tunas and similar
Canned/jarred fish
Canned/jarred vegetables
Cape gooseberries
Capers buds
Carambolas
Carps
Carrots
Cashew nuts
Cauliflowers
Celeriacs
Celeries
Ceps
Cereal and cereal-like flours
Cereal bars
Cereal bran
Cereal flakes and similar
Cereal products and grains based soup
Champagne-like wine
Chanterelles
Chapati
Cheese
Cheese cake
Cheese cream sponge cake
Cheese sauce
Cheese, Appenzeller
Cheese, Bavarian Blue
Cheese, Brie
Cheese, Butterkase
Cheese, Camembert
Cheese, Cheddar
Cheese, Cheshire
Cheese, Comte
Cheese, Danbo
Cheese, Edam
Cheese, Emmental
Cheese, Esrom
Cheese, Feta
Cheese, Gorgonzola
Cheese, Gouda
Cheese, Gruyere
Cheese, Harzer
Cheese, Limburger
Cheese, Maasdam
Cheese, Parmigiano Reggiano
Cheese, Raclette
Cheese, Roquefort
Cheese, Tilsit
Cheese, White Stilton
Cherimoyas
Cherries (sweet)
Cherry tomatoes
Chervil
Chestnut puree (castanea vulgaris)
Chestnuts
Chewing gum
Chicken fresh meat
Chicken liver
Chicken, other slaughtering products
Chickpeas (dry)
Chickpeas (without pods)
Chicory coffee infusion
Chicory coffee ingredient
Chili peppers
Chinese cabbages
Chives
Chocolate cake
Chocolate sauce
Chocolate/cocoa-based products
Cider
Cocktail drink
Cocoa beverage-preparation, powder
Coconut milk (cocos nucifera) liquid
Coconut oil/fat
Coconuts
Cod
Cod liver oil
Coffee (weak strength) beverage
Coffee beverages
Coffee drink, cappuccino
Coffee espresso (beverage)
Coffee imitate beverages
Coffee liqueur
Cola beverages, caffeinic
Cola beverages, decaffeinated
Cola mix, flavoured cola
Common millet and similar-
Common mushrooms
Common nettle
Common wheat grain
Compote of fruit / vegetables
Condensed milk (sometimes with added sugars)
Condiments (including table-top formats)
Confectionery including chocolate
Continental european brown cooked sauce, gravy
Cooked bratwurst-type sausage
Cooked salami
Cooked sausages (generic)
Corn curls
Corn semolina based thick soup
Corned beef, uncooked
Corned pork meat, cooked
Cottage cheese
Courgettes
Couscous
Cow milk
Cow milk, semi skimmed (half fat)
Cow milk, whole
Cow, ox or bull fresh meat
Crackers and breadsticks
Cream and cream products
Cream cake
Cream cheese
Cream custard sponge cake
Cream liqueur
Cream powder
Cream sauce
Cream sprayable
Cream, plain
Cream-cheese strudel
Creme fraiche and other mild variants of sour cream
Cresses
Crisp bread
Crisp bread, rye, refined flour
Crisp bread, wheat, refined flour
Crisp bread, wheat, wholemeal
Crisp lettuces
Croissant
Croissant from puff pastry
Croissant, filled with chocolate
Croissant, filled with cream
Crucian carp
Crustaceans
Cucumbers
Cultivated fungi and similar-
Cured ripened raw sausages
Cured seasoned poultry meat
Curly endives
Curly kales
Currants (black, red and white)
Curry sauce
Cutting lettuces
Cuttlefish, common
Dairy/egg soup
Dandelion leaves (forced)
Dates
Deer fresh meat
Dehydrated/powdered fruit juice
Dill leaves
Doughnuts-berliner
Dried apples
Dried apricots
Dried bananas
Dried dates
Dried durum pasta
Dried figs
Dried fish
Dried fruit
Dried herbs
Dried mangoes
Dried mushrooms
Dried nuts and related flours and powders
Dried pasta
Dried pears
Dried prunes
Dried vegetables
Dried vine fruits (raisins etc.)
Drinking water
Duck fresh meat
Dumpling, sweet
eclair
Egg liqueur
Egg powder
Elderberries
Energy drinks
Equine fresh meat
Escaroles and similar-
Evaporated milk (liquid, unsweetened)
Fats and oils from terrestrial animals
Fermented tea infusion
Fermented vegetables
Figs
Filled chocolate
Fine bakery wares
Firm - ripened cheeses
Firm-ripened bloomy (white mould) or washed rind cheese
Firm-ripened blue mould-veined cheese
Firm/semi-hard cheese (gouda and edam type)
Fish (meat)
Fish and seafood based dishes
Fish balls
Fish fingers, breaded
Fish gratin
Fish oil
Fish pate
Fish roe
Fish soup
Flavoured milks
Flavoured sugar
Flavoured traditional sour milk products
Florence fennels
Foamed sugar products (marshmallows)
Food for weight reduction
Fortified and liqueur wines
Frankfurter sausage
French beans (with pods)
French beans canned
Fresh bratwurst
Fresh raw sausages
Fresh uncured cheese
Freshwater bream - Europe
Freshwater crayfishes
Fried eggs
Fries (finger chips)
Frog meat (Rana genus)
Fructose
Fruit / vegetable juices and nectars
Fruit and fruit products
Fruit cake
Fruit compote, apple
Fruit compote, apricot
Fruit compote, cranberry
Fruit compote, mandarin
Fruit compote, mixed fruit
Fruit compote, peach
Fruit compote, pear
Fruit compote, pineapple
Fruit compote, plum
Fruit compote, sour cherry
Fruit compote, sweet cherry
Fruit juices (100% from named source)
Fruit liqueur
Fruit nectars (min. 25-50% fruit as defined in EU legislation)
Fruit or fruit-vegetable puree
Fruit pie-tarts
Fruit salad
Fruit sauce
Fruit soft drink, orange
Fruit soup
Fruiting vegetables
Gages
Garden peas (dry)
Garden peas (with pods)
Garden peas (without pods)
Garden sorrel
Garlic
Garlic puree
Gazpacho and similar
Gelatine
Gelatine dessert
German salami
Gin
Ginger roots
Gingerbread
Globe artichokes
Globe tomato
Glucose
Gnocchi
Goat milk
Goose fat, processed
Goose fresh meat
Gooseberries and similar-
Granate apples
Grape leaves
Grapefruits
Gravy thickener
Groats
Haddock
Hakes
Halibut
Ham, beef
Ham, pork
Hard candies
Hard cheese (cheddar, emmental type)
Hardened egg products
Hare fresh meat
Hazelnuts
Head cheese
Head lettuces
Hen egg white
Hen egg yolk
Hen eggs
Herb liqueur
Herbal and other non-tea infusions
Herbs, vegetables and oil sauces
Herbs/spices sauces
Herrings
Hollandaise type sauce
Honey
Honey mushroom
Horseradish roots
Horseradish sauce
Hungarian-type salami
Ice cream, milk-based
Ice from tap water
Imitation cream
Indian rice grain
Instant coffee (beverage)
Instant coffee powder
Instant coffee powder, decaffeinated
Isotonic and sport drinks
Italian-type salami
Jam of fruit / vegetables
Jelly candies
Juice, apricot-orange
Juice, beetroot
Juice, black currant
Juice, carrot
Juice, celery
Juice, elderberry
Juice, grape
Juice, grapefruit
Juice, lemon
Juice, mixed fruit
Juice, orange
Juice, pear
Juice, pineapple
Juice, red currant
Juice, tomato
Juice, white cabbage
Kaki
Kefir
Kidney bean (dry seeds)
Kidney bean (fresh seeds)
Kiwi fruits (green, red, yellow)
Knackwurst-type sausage
Kohlrabies
Lactose
Lamb fresh meat
Lamb's lettuces
Lasagna
Leafy vegetables
Leavened bread and similar
Lebkuchen
Leeks
Legume (beans) soup
Legumes with pod
Lemon balm
Lemons
Lentils (without pods)
Limes
Linseed oil
Liqueurs
Liquorice candies
Litchis
Liver based spreadable-textured specialities
Liver cheese
Liver-type sausage
Lobsters
Lovage leaves
Macadamia integrifolia
Macaroons
Mackerel
Madeira
Maize and similar-
Maize oil, edible
Maize starch
Malt coffee infusion
Malt coffee ingredient
Mammals and birds meat
Mammals edible offal, non-muscle, other than liver and kidney
Mammals meat
Mammals other slaughtering products
Mandarins
Mangoes
Marinated / pickled fish
Marinated / pickled seafood
Marinated meat
Marjoram, dry
Marzipan
Mascarpone
Mashed potato powder
Mashed vegetable puree
Mate infusion
Mayonnaise sauce
Mayonnaise, hollandaise and related sauces
Mayonnaise, low fat
Meat and vegetable soup
Meat balls
Meat based dishes
Meat based spreadable-textured specialities
Meat in aspic
Meat soup
Meat soup, clear
Meat specialties
Melons
Meringue
Mettwurst-type sausage
Milk chocolate
Milk imitates
Milk powder
Milk powder, full fat
Milkshakes
Millet groats
Mints, dry
Mirabelles
Miscellaneous fruits (generic)
Miscellaneous savoury extracts
Mixed coffee imitates
Mixed green salad
Mixed vegetable salad
Mixed vegetables
Mixed vegetables soup
Mixed vegetables soup, clear
Mixed vegetables, boiled
Mixed vegetables, fried
Mixed vegetables, grilled
Mixed wheat and rye bread and rolls
Molluscs
Morels
Mortadella-type sausage
Mozzarella
Muesli and similar mixed breakfast cereals
Muesli plain
Muffins
Mullets
Multigrain (not only rye-wheat) bread and rolls
Multivitamin juices
Mung bean sprouts
Mung beans (without pods)
Mushroom soup
Mushrooms cooked sauce
Mussels
Mustard and related sauces
Mustard, hot
Mustard, mild
Mustard, sweet
Natural mineral water
Nectar, banana
Nectarines
Non-fermented tea, infusion
Nougat
Nut/seeds paste/emulsion/mass
Oat flour
Oat grain
Oat groats
Oat high-bran flakes
Oat popped
Olive oils
Onion soup
Onions
Oranges
Oregano
Other desserts spoonable
Other fruit spreads
Oyster, european
Pale ale beer
Palm oil/fat
Pan-fried potato
Pancakes
Papayas
Paprika powder
Parsley
Parsnip roots
Passionfruits
Pasta based dishes, cooked
Pasta wholemeal
Pasta, filled with meat mix, cooked
Pasta, filled, cooked
Pasta, plain (not stuffed), cooked
Pasta, plain (not stuffed), uncooked
Pasta, with mixed or unspecified filling, cooked
Pastry based on laminated dough
Pate, chicken liver
Pate, goose liver
Pate, pork liver
Peaches and similar-
Peanut butter
Peanut oil, edible
Peanuts
Pearl onion
Pearl oyster mushrooms
Pecans
Peppercorn (black, green and white)
Peppermint
Peppers, dried
Perch
Pesto
Pheasant fresh meat
Pickled / marinated vegetables
Pig fresh meat
Pig kidney
Pig liver
Pig minced meat
Pig tongue
Pigeon fresh meat
Pike
Pike-perch
Pineapples
Pistachios
Pita bread
Pizza and pizza-like dishes
Pizza and similar with cheese topping
Pizza and similar with cheese, and vegetables
Pizza and similar with processed meat topping
Plaice
Plums
Poached eggs
Pollack, pollock
Pomelos
Popcorn (maize, popped)
Popped cereals
Poppy seeds
Pork lard
Porridge milk based (ready to eat)
Port
Potato baked
Potato based dishes
Potato boiled
Potato crisps or sticks
Potato croquettes
Potato flour
Potato puree from flakes or powder
Potato puree from potatoes
Potato soup
Potato starch
Potatoes
Potatoes and cheese meal
Poultry fresh meat (muscle meat)
Poultry liver
Poultry other slaughtering products
Pre-cooked sausages to be cooked before consumption
Preserved or partly preserved sausages
Preserved tomato, whole or pieces
Pretzels
Prickly pears
Processed barley-based flakes
Processed cheese and spreads
Processed cheese, sliceable
Processed cheese, spreadable
Processed maize-based flakes
Processed oat-based flakes
Processed or preserved fish (including processed offal)
Processed rye-based flakes
Processed wheat-based flakes
Processed whole meat products
Profiterole
Protein and protein components for sports people
Pulses (dried legume seeds)
Pumpernickel
Pumpkin seed oil
Pumpkins
Punch
Quail fresh meat
Quinces
Rabbit fresh meat
Rabbit liver
Radicchio
Rape seed oil, edible
Raspberries (red and yellow)
Ratites fresh meat
Raw cured (or seasoned) meat
Red cabbages
Redcurrants
Refined beet sugar
Rhubarb flan
Rhubarbs
Ricotta
Ripened cheese
River eels
Roe deer meat
Roesti
Romaines
Rooibos infusion
Root and tuber vegetables (excluding starchy- and sugar-)
Rosemary
Rosemary, dry
Rusk, refined flour
Rusk, wholemeal
Rye bread and rolls, refined flour
Rye flour, wholemeal
Rye grain
Rye only bread and rolls
Rye porridge
Rye-wheat bread and rolls, wholemeal
Safflower seed oil, edible
Sage
Salad dressing
Salads
Salami-type sausage
Salmons
Salsa
Salt
Salt, flavoured
Salt, iodised
Salt, iodised and fluoridated
Salted seafood
Salted vegetables
Sandwich with processed meat topping/filling
Sandwiches, pizza and other stuffed bread-like cereal products
Sardines and sardine-type fishes
Sauces from fermented/hydrolised sources and similar
Sauerkraut
Sausages
Savoury sauces
Savoy cabbages
Scallops, pectens
Scorzonera
Seafood salad
Seasoning mixes
Semolina
Sesame paste (tahini) (sesamus indicum)
Sesame seed oil, edible
Shallots
Shandy
Sheep kidney
Sheep liver
Sheep milk
Sheep other slaughtering products
Sherry
Shiitake
Shortcrust (pies -tarts)
Shrimps and prawns
Shrimps, common
Sliceable or firm cooked sausages
Small radishes
Smoked herring
Smoked mackerel
Smoked salmon
Snack sausages (like Cabanos and landjager)
Snails
Soft - ripened cheese
Soft drink with bitter principle
Soft drink, flavoured, no fruit
Soft drink, lemon flavour
Soft drink, orange flavour
Soft drink, with fruit juice (fruit content below the minimum f
Soft drinks
Soft-ripened washed-rind cheese (limburger type)
Sole
Sorbet
Sorrel
Soups (ready-to-eat)
Sour cherries
Sour cream, plain
Soy sauce
Soya bean oil, refined
Soya drink
Soya yoghurt
Soyabeans (without pods)
Soyabeans for consumption (dry)
Soyabeans sprouts
Sparkling wine
Speculaas
Spelt flour
Spelt flour, wholemeal
Spelt grain
Spice cakes
Spices
Spinaches
Spiny and rock lobsters
Spirits made from fruits other than stone fruits
Spirits not from fruit
Sponge cake
Sponge cake roll
Sprat
Spreadable cooked sausages
Spring onions
Spring rolls
Sprouts, shoots and similar
Starches
Starchy pudding
Stems/stalks eaten as vegetables
Sticks, salty
Stock cubes or granulate (bouillon base)
Stone pine nut kernels
Strained yoghurt
Strawberries
Structured/textured fish meat products or fish paste
Sugar beet syrup
Sugar cotton
Sugar, icing - powder
Sugars (mono- and di-saccharides)
Sun-dried tomatoes
Sunflower seed oil, edible
Swedes
Sweet corn
Sweet corn canned
Sweet peppers
Sweet potatoes
Swiss chards
Syrups
Tabasco sauce
Table olives
Table-top sweeteners formulations
Table-top sweeteners in liquid form
Table-top sweeteners in powder form
Table-top sweeteners in tablets
Tap water
Tea beverages
Tea extract (powder)
Tea infusion with added flavouring ingredients
Textured soy protein
Thuringian sausage
Thyme
Thyme, dry
Tofu
Tomato ketchup and related sauces
Tomato paste
Tomato puree
Tomato soup
Tomato-containing cooked sauces
Tomatoes
Tortilla
Tortilla chips
Traditional margarine
Traditional sour milk products
Tree nuts
Tropical root and tuber vegetables
Trouts
Truffles
Tuna
Turbot
Turkey fresh meat
Turkey liver
Turnips
Tzatziki
Unleavened or flat bread and similar
Unsweetened spirits
Various pastry
Veal liver
Vegetable based dishes
Vegetable casserole
Vegetable fats and oils, edible
Vegetable juices
Vegetable savoury extracts
Vermouth
Vinegar, wine
Vodka and vodka-like spirits
Wafers
Waffles
Walnut oil
Walnuts
Water based beverages
Watermelons
Weisswurst
Wheat beer
Wheat bran
Wheat bread and rolls, brown or wholemeal
Wheat bread and rolls, semi-brown
Wheat bread and rolls, white (refined flour)
Wheat bread and rolls, white with maize
Wheat bread and rolls, white with potato
Wheat bread and rolls, white with rice
Wheat bread and rolls, white with soya
Wheat flour
Wheat germ
Wheat germ oil
Wheat groats
Wheat semolina
Wheat starch
Wheat, popped
Whey
Whisky
White cabbage
White chocolate
White sauces
White sugar
Whiting
Wiener sausage
Wild boar fresh meat
Wine, red
wine, rose
Wine, white
Wine-like drinks
Witloofs
Yoghurt drinks, including sweetened and/or flavoured variants
Yoghurt, cow milk
Yoghurt, cow milk, plain

## Sheet: T SI-3 abbreviated food names
Name used in manuscript	Level in FoodEx2 hierarchy	Name in FoodEx2 hierarchy
Fruit products	L1	Fruit and fruit products
Vegetable products	L1	Vegetables and vegetable products
Juice products	L1	Fruit and vegetable juices and nectars (including concentrates)
Legumes, nuts, seeds	L1	Legumes, nuts, oilseeds and spices
Sugar products	L1	Sugar and similar, confectionery and water-based sweet desserts
Grain products	L1	Grains and grain-based products
Potato products	L1	Starchy roots or tubers and products thereof, sugar plants
Fats, oils	L1	Animal and vegetable fats and oils and primary derivatives thereof
Dairy products	L1	Milk and dairy products
Egg products	L1	Eggs and egg products
Fish products	L1	Fish, seafood, amphibians, reptiles and invertebrates
Meat products	L1	Meat and meat products
Alcohol	L1	Alcoholic beverages
Coffee, cocoa, tea	L1	Coffee, cocoa, tea and infusions
Beverages	L1	Water and water-based beverages
Products for non-standard diets	L1	Products for non-standard diets, food imitates and food supplements
Sauces	L1	Seasoning, sauces and condiments
Nuts and seeds	L2	Nuts, oilseeds and oilfruits
Preserved vegetables	L2	Processed or preserved vegetables and similar
Margarine	L3	Margarines and similar
Tomatoes	L4	Tomatoes and similar-
Sunflower seed oil	L7	Sunflower seed oil, edible
Rape seed oil	L7	Rape seed oil, edible
Bananas	L7	Bananas and similar-
Wheat bread and rolls, white	L7	Wheat bread and rolls, white (refined flour)
Rye-wheat bread, wholemeal	L7	Rye-wheat bread and rolls, wholegrain
Multigrain bread	L7	Multigrain (not only rye-wheat) bread and rolls
Rye bread, wholemeal	L7	Rye bread and rolls, wholemeal
Jam	L7	Jam of fruit / vegetables
Mixed wheat-rye bread	L7	Mixed wheat and rye bread and rolls
Wheat bread, wholemeal	L7	Wheat bread and rolls, brown or wholemeal
Cow milk, semi skimmed	L7	Cow milk, semi skimmed (half fat)
Mixed salad	L7	Mixed vegetable salad
Coffee beverage	L7	Coffee (weak strength) beverage
Lentils	L7	Lentils (dry)
	L7	Lentils (without pods)
Borlotti beans	L7	Borlotti or other common beans (dry)
	L7	Borlotti or other common beans (without pods)
Canned legumes	L3	Canned or jarred legumes
	L7	Canned/jarred vegetables
candied nuts	L7	Candied or sugar preserved nuts
Orange juice	L7	Juice, orange
Broad beans	L7	Broad beans (without pods)
Canned chickpeas	L7	Canned or jarred chickpea
Pickled vegetables	L7	Pickled/marinated vegetables
Skimmed milk	L7	Cow milk, semi skimmed (half fat)
Gouda	L7	Cheese, gouda
Ice cream	L7	Ice cream, milk-based
Canned fish	L7	Canned/jarred fish
Ketchup	L7	Tomato ketchup and related sauces
Dried Basil	L7	Basil, dry
Dried peppers	L7	Peppers, dried
Cola beverage	L7	Cola beverage, caffeinic
Orange soft drink	L7	Soft drink, orange flavour
Cappuccino	L7	Coffee drink, cappuccino
Boiled potato	L7	Potato, boiled

## Sheet: T SI-4 FoodEx2
L1	L2	L3	L4	L5	L6	L7 (corresponding to food f)
Fruit and fruit products	Fruit and fruit products	Fruit and fruit products	Fruit and fruit products	Fruit and fruit products	Fruit and fruit products	Fruit and fruit products
Fruit and fruit products	Fruit used as fruit	Citrus fruits	Mandarins and similar-	Mandarins	Mandarins	Mandarins
Fruit and fruit products	Fruit used as fruit	Citrus fruits	Grapefruits and similar-	Grapefruits	Grapefruits	Grapefruits
Fruit and fruit products	Fruit used as fruit	Citrus fruits	Grapefruits and similar-	Shaddocks	Pomelos	Pomelos
Fruit and fruit products	Fruit used as fruit	Citrus fruits	Lemons and similar-	Lemons	Lemons	Lemons
Fruit and fruit products	Fruit used as fruit	Citrus fruits	Oranges and similar-	Oranges	Oranges	Oranges
Fruit and fruit products	Fruit used as fruit	Citrus fruits	Limes and similar-	Limes	Limes	Limes
Fruit and fruit products	Fruit used as fruit	Stone fruits	Peaches and similar-	Peaches and similar-	Peaches and similar-	Peaches and similar-
Fruit and fruit products	Fruit used as fruit	Stone fruits	Peaches and similar-	Nectarines	Nectarines	Nectarines
Fruit and fruit products	Fruit used as fruit	Stone fruits	Apricots and similar-	Apricots	Apricots	Apricots
Fruit and fruit products	Fruit used as fruit	Stone fruits	Cherries and similar-	Cherries (sweet)	Cherries (sweet)	Cherries (sweet)
Fruit and fruit products	Fruit used as fruit	Stone fruits	Cherries and similar-	Sour cherries	Sour cherries	Sour cherries
Fruit and fruit products	Fruit used as fruit	Stone fruits	Plums and similar-	Gages	Gages	Gages
Fruit and fruit products	Fruit used as fruit	Stone fruits	Plums and similar-	Mirabelles	Mirabelles	Mirabelles
Fruit and fruit products	Fruit used as fruit	Stone fruits	Plums and similar-	Plums	Plums	Plums
Fruit and fruit products	Fruit used as fruit	Berries and small fruits	Berries and small fruits	Berries and small fruits	Berries and small fruits	Berries and small fruits
Fruit and fruit products	Fruit used as fruit	Berries and small fruits	Gooseberries and similar-	Gooseberries and similar-	Gooseberries and similar-	Gooseberries and similar-
Fruit and fruit products	Fruit used as fruit	Berries and small fruits	Cane fruits	Raspberries and similar-	Raspberries (red and yellow)	Raspberries (red and yellow)
Fruit and fruit products	Fruit used as fruit	Berries and small fruits	Cane fruits	Blackberries and similar-	Blackberries	Blackberries
Fruit and fruit products	Fruit used as fruit	Berries and small fruits	Currants and similar-	Currants (black, red and white)	Currants (black, red and white)	Currants (black, red and white)
Fruit and fruit products	Fruit used as fruit	Berries and small fruits	Currants and similar-	Currants (black, red and white)	Blackcurrants	Blackcurrants
Fruit and fruit products	Fruit used as fruit	Berries and small fruits	Currants and similar-	Currants (black, red and white)	Redcurrants	Redcurrants
Fruit and fruit products	Fruit used as fruit	Berries and small fruits	Strawberries and similar-	Strawberries	Strawberries	Strawberries
Fruit and fruit products	Fruit used as fruit	Berries and small fruits	Blueberries and similar-	Bilberries (generic)	Bilberries (generic)	Bilberries (generic)
Fruit and fruit products	Fruit used as fruit	Berries and small fruits	Elderberries and similar-	Elderberries	Elderberries	Elderberries
Fruit and fruit products	Fruit used as fruit	Miscellaneous fruits (generic)	Miscellaneous fruits (generic)	Miscellaneous fruits (generic)	Miscellaneous fruits (generic)	Miscellaneous fruits (generic)
Fruit and fruit products	Fruit used as fruit	Miscellaneous fruits with edible peel	Figs and similar-	Figs	Figs	Figs
Fruit and fruit products	Fruit used as fruit	Miscellaneous fruits with edible peel	Kaki and similar-	Kaki	Kaki	Kaki
Fruit and fruit products	Fruit used as fruit	Miscellaneous fruits with edible peel	Table olives and similar-	Table olives	Table olives	Table olives
Fruit and fruit products	Fruit used as fruit	Miscellaneous fruits with edible peel	Carambolas and similar-	Carambolas	Carambolas	Carambolas
Fruit and fruit products	Fruit used as fruit	Miscellaneous fruits with edible peel	Dates and similar-	Dates	Dates	Dates
Fruit and fruit products	Fruit used as fruit	Miscellaneous fruits with inedible peel, large	Bananas and similar-	Bananas and similar-	Bananas and similar-	Bananas and similar-
Fruit and fruit products	Fruit used as fruit	Miscellaneous fruits with inedible peel, large	Avocados and similar-	Avocados	Avocados	Avocados
Fruit and fruit products	Fruit used as fruit	Miscellaneous fruits with inedible peel, large	Mangoes and similar-	Mangoes	Mangoes	Mangoes
Fruit and fruit products	Fruit used as fruit	Miscellaneous fruits with inedible peel, large	Papayas and similar-	Papayas	Papayas	Papayas
Fruit and fruit products	Fruit used as fruit	Miscellaneous fruits with inedible peel, large	Pineapples and similar-	Pineapples	Pineapples	Pineapples
Fruit and fruit products	Fruit used as fruit	Miscellaneous fruits with inedible peel, large	Cherimoyas and similar-	Cherimoyas	Cherimoyas	Cherimoyas
Fruit and fruit products	Fruit used as fruit	Miscellaneous fruits with inedible peel, large	Granate apples and similar-	Granate apples	Granate apples	Granate apples
Fruit and fruit products	Fruit used as fruit	Miscellaneous fruits with inedible peel, small	Kiwi fruits and similar-	Kiwi fruits (green, red, yellow)	Kiwi fruits (green, red, yellow)	Kiwi fruits (green, red, yellow)
Fruit and fruit products	Fruit used as fruit	Miscellaneous fruits with inedible peel, small	Litchis and similar-	Litchis	Litchis	Litchis
Fruit and fruit products	Fruit used as fruit	Miscellaneous fruits with inedible peel, small	Prickly pears and similar-	Prickly pears	Prickly pears	Prickly pears
Fruit and fruit products	Fruit used as fruit	Miscellaneous fruits with inedible peel, small	Passionfruits and similar-	Passionfruits	Passionfruits	Passionfruits
Fruit and fruit products	Fruit used as fruit	Pome fruits	Pears and similar-	Pears	Pears	Pears
Fruit and fruit products	Fruit used as fruit	Pome fruits	Quinces and similar-	Quinces	Quinces	Quinces
Fruit and fruit products	Processed fruit products	Dried fruit	Dried dates	Dried dates	Dried dates	Dried dates
Fruit and fruit products	Processed fruit products	Dried fruit	Dried figs	Dried figs	Dried figs	Dried figs
Fruit and fruit products	Processed fruit products	Dried fruit	Dried vine fruits (raisins etc.)	Dried vine fruits (raisins etc.)	Dried vine fruits (raisins etc.)	Dried vine fruits (raisins etc.)
Fruit and fruit products	Processed fruit products	Dried fruit	Dried apples	Dried apples	Dried apples	Dried apples
Fruit and fruit products	Processed fruit products	Dried fruit	Dried apricots	Dried apricots	Dried apricots	Dried apricots
Fruit and fruit products	Processed fruit products	Dried fruit	Dried bananas	Dried bananas	Dried bananas	Dried bananas
Fruit and fruit products	Processed fruit products	Dried fruit	Dried fruit	Dried fruit	Dried fruit	Dried fruit
Fruit and fruit products	Processed fruit products	Dried fruit	Dried mangoes	Dried mangoes	Dried mangoes	Dried mangoes
Fruit and fruit products	Processed fruit products	Dried fruit	Dried pears	Dried pears	Dried pears	Dried pears
Fruit and fruit products	Processed fruit products	Dried fruit	Dried prunes	Dried prunes	Dried prunes	Dried prunes
Fruit and fruit products	Processed fruit products	Fruit / vegetable spreads and similar	Other fruit spreads	Other fruit spreads	Other fruit spreads	Other fruit spreads
Fruit and fruit products	Processed fruit products	Fruit / vegetable spreads and similar	Compote of fruit / vegetables	Fruit compote, mixed fruit	Fruit compote, mixed fruit	Fruit compote, mixed fruit
Fruit and fruit products	Processed fruit products	Fruit / vegetable spreads and similar	Compote of fruit / vegetables	Compote of fruit / vegetables	Compote of fruit / vegetables	Compote of fruit / vegetables
Fruit and fruit products	Processed fruit products	Fruit / vegetable spreads and similar	Compote of fruit / vegetables	Fruit compote, apple	Fruit compote, apple	Fruit compote, apple
Fruit and fruit products	Processed fruit products	Fruit / vegetable spreads and similar	Compote of fruit / vegetables	Fruit compote, peach	Fruit compote, peach	Fruit compote, peach
Fruit and fruit products	Processed fruit products	Fruit / vegetable spreads and similar	Compote of fruit / vegetables	Fruit compote, pineapple	Fruit compote, pineapple	Fruit compote, pineapple
Fruit and fruit products	Processed fruit products	Fruit / vegetable spreads and similar	Compote of fruit / vegetables	Fruit compote, plum	Fruit compote, plum	Fruit compote, plum
Fruit and fruit products	Processed fruit products	Fruit / vegetable spreads and similar	Compote of fruit / vegetables	Fruit compote, sour cherry	Fruit compote, sour cherry	Fruit compote, sour cherry
Fruit and fruit products	Processed fruit products	Fruit / vegetable spreads and similar	Compote of fruit / vegetables	Fruit compote, sweet cherry	Fruit compote, sweet cherry	Fruit compote, sweet cherry
Fruit and fruit products	Processed fruit products	Fruit / vegetable spreads and similar	Compote of fruit / vegetables	Fruit compote, apricot	Fruit compote, apricot	Fruit compote, apricot
Fruit and fruit products	Processed fruit products	Fruit / vegetable spreads and similar	Compote of fruit / vegetables	Fruit compote, cranberry	Fruit compote, cranberry	Fruit compote, cranberry
Fruit and fruit products	Processed fruit products	Fruit / vegetable spreads and similar	Compote of fruit / vegetables	Fruit compote, mandarin	Fruit compote, mandarin	Fruit compote, mandarin
Fruit and fruit products	Processed fruit products	Fruit / vegetable spreads and similar	Compote of fruit / vegetables	Fruit compote, pear	Fruit compote, pear	Fruit compote, pear
Fruit and fruit products	Processed fruit products	Fruit / vegetable spreads and similar	Jam of fruit / vegetables	Jam of fruit / vegetables	Jam of fruit / vegetables	Jam of fruit / vegetables
Fruit and fruit products	Processed fruit products	Other processed fruit products (excluding beverages)	Candied fruits	Candied fruits	Candied fruits	Candied fruits
Fruit and fruit products	Processed fruit products	Other processed fruit products (excluding beverages)	Canned or jarred fruit	Canned or jarred fruit	Canned or jarred fruit	Canned or jarred fruit
Fruit and fruit products	Processed fruit products	Other processed fruit products (excluding beverages)	Fruit or fruit-vegetable puree	Fruit or fruit-vegetable puree	Fruit or fruit-vegetable puree	Fruit or fruit-vegetable puree
Milk and dairy products	Cheese	Cheese	Cheese	Cheese	Cheese	Cheese
Milk and dairy products	Cheese	Fresh uncured cheese	Quark	Quark	Quark	Quark
Milk and dairy products	Cheese	Fresh uncured cheese	Fresh uncured cheese	Fresh uncured cheese	Fresh uncured cheese	Fresh uncured cheese
Milk and dairy products	Cheese	Fresh uncured cheese	Cottage cheese	Cottage cheese	Cottage cheese	Cottage cheese
Milk and dairy products	Cheese	Fresh uncured cheese	Mascarpone	Mascarpone	Mascarpone	Mascarpone
Milk and dairy products	Cheese	Fresh uncured cheese	Mozzarella	Mozzarella	Mozzarella	Mozzarella
Milk and dairy products	Cheese	Fresh uncured cheese	Ricotta	Ricotta	Ricotta	Ricotta
Milk and dairy products	Cheese	Fresh uncured cheese	Miscellaneous fresh uncured cheeses	Cream cheese	Cream cheese	Cream cheese
Milk and dairy products	Cheese	Processed cheese and spreads	Processed cheese and spreads	Processed cheese and spreads	Processed cheese and spreads	Processed cheese and spreads
Milk and dairy products	Cheese	Processed cheese and spreads	Processed cheese, sliceable	Processed cheese, sliceable	Processed cheese, sliceable	Processed cheese, sliceable
Milk and dairy products	Cheese	Processed cheese and spreads	Processed cheese, spreadable	Processed cheese, spreadable	Processed cheese, spreadable	Processed cheese, spreadable
Milk and dairy products	Cheese	Ripened cheese	Firm - ripened cheeses	Firm/semi-hard cheese (gouda and edam type)	Cheese, Danbo	Cheese, Danbo
Milk and dairy products	Cheese	Ripened cheese	Firm - ripened cheeses	Firm/semi-hard cheese (gouda and edam type)	Cheese, Appenzeller	Cheese, Appenzeller
Milk and dairy products	Cheese	Ripened cheese	Firm - ripened cheeses	Firm/semi-hard cheese (gouda and edam type)	Cheese, Butterkase	Cheese, Butterkase
Milk and dairy products	Cheese	Ripened cheese	Firm - ripened cheeses	Firm/semi-hard cheese (gouda and edam type)	Cheese, Cheshire	Cheese, Cheshire
Milk and dairy products	Cheese	Ripened cheese	Firm - ripened cheeses	Firm/semi-hard cheese (gouda and edam type)	Cheese, Edam	Cheese, Edam
Milk and dairy products	Cheese	Ripened cheese	Firm - ripened cheeses	Firm/semi-hard cheese (gouda and edam type)	Cheese, Esrom	Cheese, Esrom
Milk and dairy products	Cheese	Ripened cheese	Firm - ripened cheeses	Firm/semi-hard cheese (gouda and edam type)	Cheese, Gouda	Cheese, Gouda
Milk and dairy products	Cheese	Ripened cheese	Firm - ripened cheeses	Firm/semi-hard cheese (gouda and edam type)	Cheese, Maasdam	Cheese, Maasdam
Milk and dairy products	Cheese	Ripened cheese	Firm - ripened cheeses	Firm/semi-hard cheese (gouda and edam type)	Cheese, Raclette	Cheese, Raclette
Milk and dairy products	Cheese	Ripened cheese	Firm - ripened cheeses	Firm/semi-hard cheese (gouda and edam type)	Cheese, Tilsit	Cheese, Tilsit
Milk and dairy products	Cheese	Ripened cheese	Firm - ripened cheeses	Firm/semi-hard cheese (gouda and edam type)	Cheese, White Stilton	Cheese, White Stilton
Milk and dairy products	Cheese	Ripened cheese	Firm - ripened cheeses	Firm/semi-hard cheese (gouda and edam type)	Firm/semi-hard cheese (gouda and edam type)	Firm/semi-hard cheese (gouda and edam type)
Milk and dairy products	Cheese	Ripened cheese	Firm - ripened cheeses	Hard cheese (cheddar, emmental type)	Cheese, Cheddar	Cheese, Cheddar
Milk and dairy products	Cheese	Ripened cheese	Firm - ripened cheeses	Hard cheese (cheddar, emmental type)	Cheese, Emmental	Cheese, Emmental
Milk and dairy products	Cheese	Ripened cheese	Firm - ripened cheeses	Hard cheese (cheddar, emmental type)	Cheese, Gruyere	Cheese, Gruyere
Milk and dairy products	Cheese	Ripened cheese	Firm - ripened cheeses	Hard cheese (cheddar, emmental type)	Hard cheese (cheddar, emmental type)	Hard cheese (cheddar, emmental type)
Milk and dairy products	Cheese	Ripened cheese	Firm - ripened cheeses	Extra hard cheese (parmesan, grana type)	Cheese, Comte	Cheese, Comte
Milk and dairy products	Cheese	Ripened cheese	Firm - ripened cheeses	Extra hard cheese (parmesan, grana type)	Cheese, Parmigiano Reggiano	Cheese, Parmigiano Reggiano
Milk and dairy products	Cheese	Ripened cheese	Firm - ripened cheeses	Firm - ripened cheeses	Firm - ripened cheeses	Firm - ripened cheeses
Milk and dairy products	Cheese	Ripened cheese	Firm - ripened cheeses	Firm-ripened blue mould-veined cheese	Cheese, Gorgonzola	Cheese, Gorgonzola
Milk and dairy products	Cheese	Ripened cheese	Firm - ripened cheeses	Firm-ripened blue mould-veined cheese	Cheese, Roquefort	Cheese, Roquefort
Milk and dairy products	Cheese	Ripened cheese	Firm - ripened cheeses	Firm-ripened blue mould-veined cheese	Firm-ripened blue mould-veined cheese	Firm-ripened blue mould-veined cheese
Milk and dairy products	Cheese	Ripened cheese	Firm - ripened cheeses	Firm-ripened bloomy (white mould) or washed rind cheese	Firm-ripened bloomy (white mould) or washed rind cheese	Firm-ripened bloomy (white mould) or washed rind cheese
Milk and dairy products	Cheese	Ripened cheese	Ripened cheese	Ripened cheese	Ripened cheese	Ripened cheese
Milk and dairy products	Cheese	Ripened cheese	Soft - ripened cheese	Soft-ripened cheese with bloomy rind (white mould) (brie, camem	Cheese, Brie	Cheese, Brie
Milk and dairy products	Cheese	Ripened cheese	Soft - ripened cheese	Soft-ripened cheese with bloomy rind (white mould) (brie, camem	Cheese, Camembert	Cheese, Camembert
Milk and dairy products	Cheese	Ripened cheese	Soft - ripened cheese	Soft-ripened cheese veined with blue mould (blue bavarian, blue	Cheese, Bavarian Blue	Cheese, Bavarian Blue
Milk and dairy products	Cheese	Ripened cheese	Soft - ripened cheese	Soft - ripened cheese	Soft - ripened cheese	Soft - ripened cheese
Milk and dairy products	Cheese	Ripened cheese	Soft - ripened cheese	Soft-ripened washed-rind cheese (limburger type)	Cheese, Limburger	Cheese, Limburger
Milk and dairy products	Cheese	Ripened cheese	Soft - ripened cheese	Soft-ripened washed-rind cheese (limburger type)	Soft-ripened washed-rind cheese (limburger type)	Soft-ripened washed-rind cheese (limburger type)
Milk and dairy products	Cheese	Ripened cheese	Soft - ripened cheese	Soft-ripened cheese with natural rind and other soft-ripened ch	Cheese, Harzer	Cheese, Harzer
Milk and dairy products	Cheese	Brined cheese (feta-type and similar)	Soft brined cheese (feta type)	Cheese, Feta	Cheese, Feta	Cheese, Feta
Milk and dairy products	Dairy dessert and similar	Dairy desserts spoonable	Starchy pudding	Starchy pudding	Starchy pudding	Starchy pudding
Milk and dairy products	Dairy dessert and similar	Dairy ice creams and similar	Milkshakes	Milkshakes	Milkshakes	Milkshakes
Milk and dairy products	Dairy dessert and similar	Dairy ice creams and similar	Ice cream, milk-based	Ice cream, milk-based	Ice cream, milk-based	Ice cream, milk-based
Milk and dairy products	Fermented milk or cream	Fermented milk products	Traditional sour milk products	Kefir	Kefir	Kefir
Milk and dairy products	Fermented milk or cream	Fermented milk products	Traditional sour milk products	Traditional sour milk products	Traditional sour milk products	Traditional sour milk products
Milk and dairy products	Fermented milk or cream	Fermented milk products	Traditional sour milk products	Flavoured traditional sour milk products	Flavoured traditional sour milk products	Flavoured traditional sour milk products
Milk and dairy products	Fermented milk or cream	Fermented milk products	Yoghurt drinks, including sweetened and/or flavoured variants	Yoghurt drinks, including sweetened and/or flavoured variants	Yoghurt drinks, including sweetened and/or flavoured variants	Yoghurt drinks, including sweetened and/or flavoured variants
Milk and dairy products	Fermented milk or cream	Fermented milk products	Yoghurt	Yoghurt, cow milk	Yoghurt, cow milk	Yoghurt, cow milk
Milk and dairy products	Fermented milk or cream	Fermented milk products	Yoghurt	Yoghurt, cow milk	Yoghurt, cow milk, flavoured	Yoghurt, cow milk, flavoured
Milk and dairy products	Fermented milk or cream	Fermented milk products	Yoghurt	Yoghurt, cow milk	Yoghurt, cow milk, plain	Yoghurt, cow milk, plain
Milk and dairy products	Fermented milk or cream	Fermented milk products	Yoghurt	Strained yoghurt	Strained yoghurt	Strained yoghurt
Milk and dairy products	Fermented milk or cream	Sour cream products	Creme fraiche and other mild variants of sour cream	Creme fraiche and other mild variants of sour cream	Creme fraiche and other mild variants of sour cream	Creme fraiche and other mild variants of sour cream
Milk and dairy products	Fermented milk or cream	Sour cream products	Sour cream, plain	Sour cream, plain	Sour cream, plain	Sour cream, plain
Milk and dairy products	Milk and dairy powders and concentrates	Milk and dairy concentrate	Condensed milk (sometimes with added sugars)	Condensed milk (sometimes with added sugars)	Condensed milk (sometimes with added sugars)	Condensed milk (sometimes with added sugars)
Milk and dairy products	Milk and dairy powders and concentrates	Milk and dairy concentrate	Evaporated milk (liquid, unsweetened)	Evaporated milk (liquid, unsweetened)	Evaporated milk (liquid, unsweetened)	Evaporated milk (liquid, unsweetened)
Milk and dairy products	Milk and dairy powders and concentrates	Milk and dairy powders	Cream powder	Cream powder	Cream powder	Cream powder
Milk and dairy products	Milk and dairy powders and concentrates	Milk and dairy powders	Milk powder	Milk powder	Milk powder	Milk powder
Milk and dairy products	Milk and dairy powders and concentrates	Milk and dairy powders	Milk powder	Milk powder, full fat	Milk powder, full fat	Milk powder, full fat
Milk and dairy products	Milk, whey and cream	Cream and cream products	Cream and cream products	Cream and cream products	Cream and cream products	Cream and cream products
Milk and dairy products	Milk, whey and cream	Cream and cream products	Cream sprayable	Cream sprayable	Cream sprayable	Cream sprayable
Milk and dairy products	Milk, whey and cream	Cream and cream products	Cream, plain	Cream, plain	Cream, plain	Cream, plain
Milk and dairy products	Milk, whey and cream	Buttermilk	Buttermilk	Buttermilk	Buttermilk	Buttermilk
Milk and dairy products	Milk, whey and cream	Milk	Goat milk	Goat milk	Goat milk	Goat milk
Milk and dairy products	Milk, whey and cream	Milk	Flavoured milks	Flavoured milks	Flavoured milks	Flavoured milks
Milk and dairy products	Milk, whey and cream	Milk	Cattle milk	Cow milk	Cow milk	Cow milk
Milk and dairy products	Milk, whey and cream	Milk	Cattle milk	Cow milk	Cow milk, semi skimmed (half fat)	Cow milk, semi skimmed (half fat)
Milk and dairy products	Milk, whey and cream	Milk	Cattle milk	Cow milk	Cow milk, skimmed (low fat)	Cow milk, skimmed (low fat)
Milk and dairy products	Milk, whey and cream	Milk	Cattle milk	Cow milk	Cow milk, whole	Cow milk, whole
Milk and dairy products	Milk, whey and cream	Milk	Ovine milk	Sheep milk	Sheep milk	Sheep milk
Milk and dairy products	Milk, whey and cream	Whey	Whey	Whey	Whey	Whey
Eggs and egg products	Processed eggs	Hardened egg products	Fried eggs	Fried eggs	Fried eggs	Fried eggs
Eggs and egg products	Processed eggs	Hardened egg products	Poached eggs	Poached eggs	Poached eggs	Poached eggs
Eggs and egg products	Processed eggs	Hardened egg products	Boiled eggs	Boiled eggs	Boiled eggs	Boiled eggs
Eggs and egg products	Processed eggs	Hardened egg products	Hardened egg products	Hardened egg products	Hardened egg products	Hardened egg products
Eggs and egg products	Processed eggs	Egg powder	Egg powder	Egg powder	Egg powder	Egg powder
Eggs and egg products	Unprocessed eggs	Liquid egg products	Egg white	Hen egg white	Hen egg white	Hen egg white
Eggs and egg products	Unprocessed eggs	Liquid egg products	Egg yolk	Hen egg yolk	Hen egg yolk	Hen egg yolk
Eggs and egg products	Unprocessed eggs	Whole eggs	Hen eggs	Hen eggs	Hen eggs	Hen eggs
Alcoholic beverages	Alcoholic beverages	Alcoholic beverages	Alcoholic beverages	Alcoholic beverages	Alcoholic beverages	Alcoholic beverages
Alcoholic beverages	Beer and beer-like beverage	Beer and beer-like beverage	Beer and beer-like beverage	Beer and beer-like beverage	Beer and beer-like beverage	Beer and beer-like beverage
Alcoholic beverages	Beer and beer-like beverage	Beer-like beverages	Beer-like beverages	Beer-like beverages	Beer-like beverages	Beer-like beverages
Alcoholic beverages	Beer and beer-like beverage	Beer-like beverages	Shandy	Shandy	Shandy	Shandy
Alcoholic beverages	Beer and beer-like beverage	Beer	Wheat beer	Wheat beer	Wheat beer	Wheat beer
Alcoholic beverages	Beer and beer-like beverage	Beer	Beer	Beer	Beer	Beer
Alcoholic beverages	Beer and beer-like beverage	Beer	Ale beer	Pale ale beer	Pale ale beer	Pale ale beer
Alcoholic beverages	Beer and beer-like beverage	Beer	Lager beer	Beer, alcohol-free	Beer, alcohol-free	Beer, alcohol-free
Alcoholic beverages	Beer and beer-like beverage	Beer	Lager beer	Beer, regular	Beer, regular	Beer, regular
Alcoholic beverages	Beer and beer-like beverage	Beer	Lager beer	Beer, strong	Beer, strong	Beer, strong
Alcoholic beverages	Beer and beer-like beverage	Beer	Lager beer	Beer, light	Beer, light	Beer, light
Alcoholic beverages	Mixed alcoholic drinks	Cocktail drink	Cocktail drink	Cocktail drink	Cocktail drink	Cocktail drink
Alcoholic beverages	Mixed alcoholic drinks	Alcopop and flavoured wine	Alcopop and flavoured wine	Alcopop and flavoured wine	Alcopop and flavoured wine	Alcopop and flavoured wine
Alcoholic beverages	Mixed alcoholic drinks	Other mixed alcoholic drinks	Punch	Punch	Punch	Punch
Alcoholic beverages	Unsweetened spirits and liqueurs	Liqueurs	Fruit liqueur	Fruit liqueur	Fruit liqueur	Fruit liqueur
Alcoholic beverages	Unsweetened spirits and liqueurs	Liqueurs	Cream liqueur	Cream liqueur	Cream liqueur	Cream liqueur
Alcoholic beverages	Unsweetened spirits and liqueurs	Liqueurs	Herb liqueur	Herb liqueur	Herb liqueur	Herb liqueur
Alcoholic beverages	Unsweetened spirits and liqueurs	Liqueurs	Coffee liqueur	Coffee liqueur	Coffee liqueur	Coffee liqueur
Alcoholic beverages	Unsweetened spirits and liqueurs	Liqueurs	Egg liqueur	Egg liqueur	Egg liqueur	Egg liqueur
Alcoholic beverages	Unsweetened spirits and liqueurs	Liqueurs	Liqueurs	Liqueurs	Liqueurs	Liqueurs
Alcoholic beverages	Unsweetened spirits and liqueurs	Unsweetened spirits	Unsweetened spirits	Unsweetened spirits	Unsweetened spirits	Unsweetened spirits
Alcoholic beverages	Unsweetened spirits and liqueurs	Unsweetened spirits	Spirits not from fruit	Vodka and vodka-like spirits	Vodka and vodka-like spirits	Vodka and vodka-like spirits
Alcoholic beverages	Unsweetened spirits and liqueurs	Unsweetened spirits	Spirits not from fruit	Whisky	Whisky	Whisky
Alcoholic beverages	Unsweetened spirits and liqueurs	Unsweetened spirits	Spirits not from fruit	Spirits not from fruit	Spirits not from fruit	Spirits not from fruit
Alcoholic beverages	Unsweetened spirits and liqueurs	Unsweetened spirits	Spirits from fruit	Spirits made from fruits other than stone fruits	Brandy	Brandy
Alcoholic beverages	Unsweetened spirits and liqueurs	Unsweetened spirits	Spirits from fruit	Spirits made from fruits other than stone fruits	Spirits made from fruits other than stone fruits	Spirits made from fruits other than stone fruits
Alcoholic beverages	Unsweetened spirits and liqueurs	Unsweetened spirits	Unsweetened flavoured spirits	Gin	Gin	Gin
Alcoholic beverages	Wine and wine-like drinks	Wine	Wine, red	Wine, red	Wine, red	Wine, red
Alcoholic beverages	Wine and wine-like drinks	Wine	Wine, white	Wine, white	Wine, white	Wine, white
Alcoholic beverages	Wine and wine-like drinks	Wine	Sparkling wine	Sparkling wine	Sparkling wine	Sparkling wine
Alcoholic beverages	Wine and wine-like drinks	Wine	Sparkling wine	Champagne-like wine	Champagne-like wine	Champagne-like wine
Alcoholic beverages	Wine and wine-like drinks	Wine	wine, rose	wine, rose	wine, rose	wine, rose
Alcoholic beverages	Wine and wine-like drinks	Wine-like drinks	Cider	Cider	Cider	Cider
Alcoholic beverages	Wine and wine-like drinks	Wine-like drinks	Wine-like drinks	Wine-like drinks	Wine-like drinks	Wine-like drinks
Alcoholic beverages	Wine and wine-like drinks	Dessert wines	Fortified and liqueur wines	Sherry	Sherry	Sherry
Alcoholic beverages	Wine and wine-like drinks	Dessert wines	Fortified and liqueur wines	Vermouth	Vermouth	Vermouth
Alcoholic beverages	Wine and wine-like drinks	Dessert wines	Fortified and liqueur wines	Fortified and liqueur wines	Fortified and liqueur wines	Fortified and liqueur wines
Alcoholic beverages	Wine and wine-like drinks	Dessert wines	Fortified and liqueur wines	Madeira	Madeira	Madeira
Alcoholic beverages	Wine and wine-like drinks	Dessert wines	Fortified and liqueur wines	Port	Port	Port
Products for non-standard diets, food imitates and food supplem	Food for particular diets	Food for weight reduction	Food for weight reduction	Food for weight reduction	Food for weight reduction	Food for weight reduction
Products for non-standard diets, food imitates and food supplem	Food for particular diets	Food for sporting people	Protein and protein components for sports people	Protein and protein components for sports people	Protein and protein components for sports people	Protein and protein components for sports people
Products for non-standard diets, food imitates and food supplem	Meat and dairy imitates	Meat imitates	Textured soy protein	Textured soy protein	Textured soy protein	Textured soy protein
Products for non-standard diets, food imitates and food supplem	Meat and dairy imitates	Dairy imitates	Milk imitates	Soya drink	Soya drink	Soya drink
Products for non-standard diets, food imitates and food supplem	Meat and dairy imitates	Dairy imitates	Milk imitates	Milk imitates	Milk imitates	Milk imitates
Products for non-standard diets, food imitates and food supplem	Meat and dairy imitates	Dairy imitates	Dairy imitates other than milks	Imitation cream	Imitation cream	Imitation cream
Products for non-standard diets, food imitates and food supplem	Meat and dairy imitates	Dairy imitates	Dairy imitates other than milks	Soya yoghurt	Soya yoghurt	Soya yoghurt
Products for non-standard diets, food imitates and food supplem	Meat and dairy imitates	Dairy imitates	Dairy imitates other than milks	Tofu	Tofu	Tofu
Coffee, cocoa, tea and infusions	Ingredients for coffee, cocoa, tea, and herbal infusions	Coffee imitate ingredients	Chicory coffee ingredient	Chicory coffee ingredient	Chicory coffee ingredient	Chicory coffee ingredient
Coffee, cocoa, tea and infusions	Ingredients for coffee, cocoa, tea, and herbal infusions	Coffee imitate ingredients	Malt coffee ingredient	Malt coffee ingredient	Malt coffee ingredient	Malt coffee ingredient
Coffee, cocoa, tea and infusions	Ingredients for coffee, cocoa, tea, and herbal infusions	Coffee imitate ingredients	Mixed coffee imitates	Mixed coffee imitates	Mixed coffee imitates	Mixed coffee imitates
Coffee, cocoa, tea and infusions	Ingredients for coffee, cocoa, tea, and herbal infusions	Hot drinks and infusions composite ingredients	Cocoa beverage-preparation, powder	Cocoa beverage-preparation, powder	Cocoa beverage-preparation, powder	Cocoa beverage-preparation, powder
Coffee, cocoa, tea and infusions	Ingredients for coffee, cocoa, tea, and herbal infusions	Tea leaves derivatives and tea ingredients	Tea powder ingredients and extracts	Tea extract (powder)	Tea extract (powder)	Tea extract (powder)
Coffee, cocoa, tea and infusions	Ingredients for coffee, cocoa, tea, and herbal infusions	Coffee ingredients	Coffee ingredients (RPC derivatives)	Instant coffee powder	Instant coffee powder	Instant coffee powder
Coffee, cocoa, tea and infusions	Ingredients for coffee, cocoa, tea, and herbal infusions	Coffee ingredients	Coffee ingredients (RPC derivatives)	Instant coffee powder, decaffeinated	Instant coffee powder, decaffeinated	Instant coffee powder, decaffeinated
Coffee, cocoa, tea and infusions	Hot drinks and similar (coffee, cocoa, tea and herbal infusions	Coffee beverages	Coffee (weak strength) beverage	Coffee (weak strength) beverage	Coffee (weak strength) beverage	Coffee (weak strength) beverage
Coffee, cocoa, tea and infusions	Hot drinks and similar (coffee, cocoa, tea and herbal infusions	Coffee beverages	Coffee beverages	Coffee beverages	Coffee beverages	Coffee beverages
Coffee, cocoa, tea and infusions	Hot drinks and similar (coffee, cocoa, tea and herbal infusions	Coffee beverages	Coffee espresso (beverage)	Coffee espresso (beverage)	Coffee espresso (beverage)	Coffee espresso (beverage)
Coffee, cocoa, tea and infusions	Hot drinks and similar (coffee, cocoa, tea and herbal infusions	Coffee beverages	Instant coffee (beverage)	Instant coffee (beverage)	Instant coffee (beverage)	Instant coffee (beverage)
Coffee, cocoa, tea and infusions	Hot drinks and similar (coffee, cocoa, tea and herbal infusions	Coffee beverages	Coffee with milk or cream	Coffee drink, cappuccino	Coffee drink, cappuccino	Coffee drink, cappuccino
Coffee, cocoa, tea and infusions	Hot drinks and similar (coffee, cocoa, tea and herbal infusions	Coffee imitate beverages	Coffee imitate beverages	Coffee imitate beverages	Coffee imitate beverages	Coffee imitate beverages
Coffee, cocoa, tea and infusions	Hot drinks and similar (coffee, cocoa, tea and herbal infusions	Coffee imitate beverages	Chicory coffee infusion	Chicory coffee infusion	Chicory coffee infusion	Chicory coffee infusion
Coffee, cocoa, tea and infusions	Hot drinks and similar (coffee, cocoa, tea and herbal infusions	Coffee imitate beverages	Malt coffee infusion	Malt coffee infusion	Malt coffee infusion	Malt coffee infusion
Coffee, cocoa, tea and infusions	Hot drinks and similar (coffee, cocoa, tea and herbal infusions	Herbal and other non-tea infusions	Mate infusion	Mate infusion	Mate infusion	Mate infusion
Coffee, cocoa, tea and infusions	Hot drinks and similar (coffee, cocoa, tea and herbal infusions	Herbal and other non-tea infusions	Rooibos infusion	Rooibos infusion	Rooibos infusion	Rooibos infusion
Coffee, cocoa, tea and infusions	Hot drinks and similar (coffee, cocoa, tea and herbal infusions	Herbal and other non-tea infusions	Fruit infusion	Fruit infusion	Fruit infusion	Fruit infusion
Coffee, cocoa, tea and infusions	Hot drinks and similar (coffee, cocoa, tea and herbal infusions	Herbal and other non-tea infusions	Herbal and other non-tea infusions	Herbal and other non-tea infusions	Herbal and other non-tea infusions	Herbal and other non-tea infusions
Coffee, cocoa, tea and infusions	Hot drinks and similar (coffee, cocoa, tea and herbal infusions	Tea beverages	Fermented tea infusion	Fermented tea infusion	Fermented tea infusion	Fermented tea infusion
Coffee, cocoa, tea and infusions	Hot drinks and similar (coffee, cocoa, tea and herbal infusions	Tea beverages	Non-fermented tea, infusion	Non-fermented tea, infusion	Non-fermented tea, infusion	Non-fermented tea, infusion
Coffee, cocoa, tea and infusions	Hot drinks and similar (coffee, cocoa, tea and herbal infusions	Tea beverages	Tea beverages	Tea beverages	Tea beverages	Tea beverages
Coffee, cocoa, tea and infusions	Hot drinks and similar (coffee, cocoa, tea and herbal infusions	Tea beverages	Tea infusion with added flavouring ingredients	Tea infusion with added flavouring ingredients	Tea infusion with added flavouring ingredients	Tea infusion with added flavouring ingredients
Composite dishes	Dishes, incl. Ready to eat meals (excluding soups and salads)	Sandwiches, pizza and other stuffed bread-like cereal products	Pizza and pizza-like dishes	Pizza and pizza-like dishes	Pizza and pizza-like dishes	Pizza and pizza-like dishes
Composite dishes	Dishes, incl. Ready to eat meals (excluding soups and salads)	Sandwiches, pizza and other stuffed bread-like cereal products	Pizza and pizza-like dishes	Pizza and similar with cheese topping	Pizza and similar with cheese topping	Pizza and similar with cheese topping
Composite dishes	Dishes, incl. Ready to eat meals (excluding soups and salads)	Sandwiches, pizza and other stuffed bread-like cereal products	Pizza and pizza-like dishes	Pizza and similar with cheese, and vegetables	Pizza and similar with cheese, and vegetables	Pizza and similar with cheese, and vegetables
Composite dishes	Dishes, incl. Ready to eat meals (excluding soups and salads)	Sandwiches, pizza and other stuffed bread-like cereal products	Pizza and pizza-like dishes	Pizza and similar with processed meat topping	Pizza and similar with processed meat topping	Pizza and similar with processed meat topping
Composite dishes	Dishes, incl. Ready to eat meals (excluding soups and salads)	Sandwiches, pizza and other stuffed bread-like cereal products	Sandwiches, pizza and other stuffed bread-like cereal products	Sandwiches, pizza and other stuffed bread-like cereal products	Sandwiches, pizza and other stuffed bread-like cereal products	Sandwiches, pizza and other stuffed bread-like cereal products
Composite dishes	Dishes, incl. Ready to eat meals (excluding soups and salads)	Sandwiches, pizza and other stuffed bread-like cereal products	Finger food	Spring rolls	Spring rolls	Spring rolls
Composite dishes	Dishes, incl. Ready to eat meals (excluding soups and salads)	Sandwiches, pizza and other stuffed bread-like cereal products	Sandwich and sandwich-like dishes	Sandwich with processed meat topping/filling	Sandwich with processed meat topping/filling	Sandwich with processed meat topping/filling
Composite dishes	Dishes, incl. Ready to eat meals (excluding soups and salads)	Dishes excluding pasta or rice dishes, sandwiches and pizza	Potato based dishes	Potato based dishes	Potato based dishes	Potato based dishes
Composite dishes	Dishes, incl. Ready to eat meals (excluding soups and salads)	Dishes excluding pasta or rice dishes, sandwiches and pizza	Potato based dishes	Potatoes and cheese meal	Potatoes and cheese meal	Potatoes and cheese meal
Composite dishes	Dishes, incl. Ready to eat meals (excluding soups and salads)	Dishes excluding pasta or rice dishes, sandwiches and pizza	Potato based dishes	Potato croquettes	Potato croquettes	Potato croquettes
Composite dishes	Dishes, incl. Ready to eat meals (excluding soups and salads)	Dishes excluding pasta or rice dishes, sandwiches and pizza	Potato based dishes	Roesti	Roesti	Roesti
Composite dishes	Dishes, incl. Ready to eat meals (excluding soups and salads)	Dishes excluding pasta or rice dishes, sandwiches and pizza	Potato based dishes	Fries (finger chips)	Fries (finger chips)	Fries (finger chips)
Composite dishes	Dishes, incl. Ready to eat meals (excluding soups and salads)	Dishes excluding pasta or rice dishes, sandwiches and pizza	Potato based dishes	Pan-fried potato	Pan-fried potato	Pan-fried potato
Composite dishes	Dishes, incl. Ready to eat meals (excluding soups and salads)	Dishes excluding pasta or rice dishes, sandwiches and pizza	Potato based dishes	Potato puree	Potato puree from flakes or powder	Potato puree from flakes or powder
Composite dishes	Dishes, incl. Ready to eat meals (excluding soups and salads)	Dishes excluding pasta or rice dishes, sandwiches and pizza	Potato based dishes	Potato puree	Potato puree from potatoes	Potato puree from potatoes
Composite dishes	Dishes, incl. Ready to eat meals (excluding soups and salads)	Dishes excluding pasta or rice dishes, sandwiches and pizza	Fish and seafood based dishes	Fish pate	Fish pate	Fish pate
Composite dishes	Dishes, incl. Ready to eat meals (excluding soups and salads)	Dishes excluding pasta or rice dishes, sandwiches and pizza	Fish and seafood based dishes	Fish balls	Fish balls	Fish balls
Composite dishes	Dishes, incl. Ready to eat meals (excluding soups and salads)	Dishes excluding pasta or rice dishes, sandwiches and pizza	Fish and seafood based dishes	Fish gratin	Fish gratin	Fish gratin
Composite dishes	Dishes, incl. Ready to eat meals (excluding soups and salads)	Dishes excluding pasta or rice dishes, sandwiches and pizza	Fish and seafood based dishes	Fish and seafood based dishes	Fish and seafood based dishes	Fish and seafood based dishes
Composite dishes	Dishes, incl. Ready to eat meals (excluding soups and salads)	Dishes excluding pasta or rice dishes, sandwiches and pizza	Fish and seafood based dishes	Seafood salad	Seafood salad	Seafood salad
Composite dishes	Dishes, incl. Ready to eat meals (excluding soups and salads)	Dishes excluding pasta or rice dishes, sandwiches and pizza	Meat based dishes	Meat balls	Meat balls	Meat balls
Composite dishes	Dishes, incl. Ready to eat meals (excluding soups and salads)	Dishes excluding pasta or rice dishes, sandwiches and pizza	Meat based dishes	Meat in aspic	Meat in aspic	Meat in aspic
Composite dishes	Dishes, incl. Ready to eat meals (excluding soups and salads)	Dishes excluding pasta or rice dishes, sandwiches and pizza	Meat based dishes	Meat based dishes	Meat based dishes	Meat based dishes
Composite dishes	Dishes, incl. Ready to eat meals (excluding soups and salads)	Dishes excluding pasta or rice dishes, sandwiches and pizza	Vegetable based dishes	Mixed vegetables	Mixed vegetables, fried	Mixed vegetables, fried
Composite dishes	Dishes, incl. Ready to eat meals (excluding soups and salads)	Dishes excluding pasta or rice dishes, sandwiches and pizza	Vegetable based dishes	Mixed vegetables	Mixed vegetables, boiled	Mixed vegetables, boiled
Composite dishes	Dishes, incl. Ready to eat meals (excluding soups and salads)	Dishes excluding pasta or rice dishes, sandwiches and pizza	Vegetable based dishes	Mixed vegetables	Mixed vegetables, grilled	Mixed vegetables, grilled
Composite dishes	Dishes, incl. Ready to eat meals (excluding soups and salads)	Dishes excluding pasta or rice dishes, sandwiches and pizza	Vegetable based dishes	Mixed vegetables	Mixed vegetables	Mixed vegetables
Composite dishes	Dishes, incl. Ready to eat meals (excluding soups and salads)	Dishes excluding pasta or rice dishes, sandwiches and pizza	Vegetable based dishes	Vegetable based dishes	Vegetable based dishes	Vegetable based dishes
Composite dishes	Dishes, incl. Ready to eat meals (excluding soups and salads)	Dishes excluding pasta or rice dishes, sandwiches and pizza	Vegetable based dishes	Vegetable casserole	Vegetable casserole	Vegetable casserole
Composite dishes	Dishes, incl. Ready to eat meals (excluding soups and salads)	Pastas and rice (or other cereal) �based dishes	Pasta based dishes, cooked	Pasta based dishes, cooked	Pasta based dishes, cooked	Pasta based dishes, cooked
Composite dishes	Dishes, incl. Ready to eat meals (excluding soups and salads)	Pastas and rice (or other cereal) �based dishes	Pasta based dishes, cooked	Pasta, filled, cooked	Pasta, filled with meat mix, cooked	Pasta, filled with meat mix, cooked
Composite dishes	Dishes, incl. Ready to eat meals (excluding soups and salads)	Pastas and rice (or other cereal) �based dishes	Pasta based dishes, cooked	Pasta, filled, cooked	Pasta, filled, cooked	Pasta, filled, cooked
Composite dishes	Dishes, incl. Ready to eat meals (excluding soups and salads)	Pastas and rice (or other cereal) �based dishes	Pasta based dishes, cooked	Pasta, filled, cooked	Pasta, with mixed or unspecified filling, cooked	Pasta, with mixed or unspecified filling, cooked
Composite dishes	Dishes, incl. Ready to eat meals (excluding soups and salads)	Pastas and rice (or other cereal) �based dishes	Pasta based dishes, cooked	Pasta, plain (not stuffed), cooked	Pasta, plain (not stuffed), cooked	Pasta, plain (not stuffed), cooked
Composite dishes	Dishes, incl. Ready to eat meals (excluding soups and salads)	Pastas and rice (or other cereal) �based dishes	Pasta based dishes, cooked	Pasta, plain (not stuffed), cooked	Lasagna	Lasagna
Composite dishes	Fried or extruded cereal, seed or root-based products	Chips, crisps, fries and dough-based analogues	Chips/crisps	Tortilla chips	Tortilla chips	Tortilla chips
Composite dishes	Fried or extruded cereal, seed or root-based products	Chips, crisps, fries and dough-based analogues	Chips/crisps	Potato crisps or sticks	Potato crisps or sticks	Potato crisps or sticks
Composite dishes	Fried or extruded cereal, seed or root-based products	Chips, crisps, fries and dough-based analogues	Puffs/curls-type extruded snack	Corn curls	Corn curls	Corn curls
Composite dishes	Soups and salads	Salads	Fruit salad	Fruit salad	Fruit salad	Fruit salad
Composite dishes	Soups and salads	Salads	Mixed green salad	Mixed green salad	Mixed green salad	Mixed green salad
Composite dishes	Soups and salads	Salads	Mixed vegetable salad	Mixed vegetable salad	Mixed vegetable salad	Mixed vegetable salad
Composite dishes	Soups and salads	Salads	Salads	Salads	Salads	Salads
Composite dishes	Soups and salads	Soups (ready-to-eat)	Potato soup	Potato soup	Potato soup	Potato soup
Composite dishes	Soups and salads	Soups (ready-to-eat)	Fruit soup	Fruit soup	Fruit soup	Fruit soup
Composite dishes	Soups and salads	Soups (ready-to-eat)	Fish soup	Fish soup	Fish soup	Fish soup
Composite dishes	Soups and salads	Soups (ready-to-eat)	Legume (beans) soup	Legume (beans) soup	Legume (beans) soup	Legume (beans) soup
Composite dishes	Soups and salads	Soups (ready-to-eat)	Mushroom soup	Mushroom soup	Mushroom soup	Mushroom soup
Composite dishes	Soups and salads	Soups (ready-to-eat)	Corn semolina based thick soup	Corn semolina based thick soup	Corn semolina based thick soup	Corn semolina based thick soup
Composite dishes	Soups and salads	Soups (ready-to-eat)	Onion soup	Onion soup	Onion soup	Onion soup
Composite dishes	Soups and salads	Soups (ready-to-eat)	Tomato soup	Tomato soup	Tomato soup	Tomato soup
Composite dishes	Soups and salads	Soups (ready-to-eat)	Gazpacho and similar	Gazpacho and similar	Gazpacho and similar	Gazpacho and similar
Composite dishes	Soups and salads	Soups (ready-to-eat)	Cereal products and grains based soup	Cereal products and grains based soup	Cereal products and grains based soup	Cereal products and grains based soup
Composite dishes	Soups and salads	Soups (ready-to-eat)	Dairy/egg soup	Dairy/egg soup	Dairy/egg soup	Dairy/egg soup
Composite dishes	Soups and salads	Soups (ready-to-eat)	Meat soup	Meat soup	Meat soup	Meat soup
Composite dishes	Soups and salads	Soups (ready-to-eat)	Meat soup	Meat soup, clear	Meat soup, clear	Meat soup, clear
Composite dishes	Soups and salads	Soups (ready-to-eat)	Soups (ready-to-eat)	Soups (ready-to-eat)	Soups (ready-to-eat)	Soups (ready-to-eat)
Composite dishes	Soups and salads	Soups (ready-to-eat)	Mixed soups	Meat and vegetable soup	Meat and vegetable soup	Meat and vegetable soup
Composite dishes	Soups and salads	Soups (ready-to-eat)	Mixed soups	Mixed vegetables soup	Mixed vegetables soup	Mixed vegetables soup
Composite dishes	Soups and salads	Soups (ready-to-eat)	Mixed soups	Mixed vegetables soup	Mixed vegetables soup, clear	Mixed vegetables soup, clear
Composite dishes	Spoonable desserts and ice creams (generic)	Other desserts spoonable	Other desserts spoonable	Other desserts spoonable	Other desserts spoonable	Other desserts spoonable
Fish, seafood, amphibians, reptiles and invertebrates	Fish offal	Fish roe	Fish roe	Fish roe	Fish roe	Fish roe
Fish, seafood, amphibians, reptiles and invertebrates	Crustaceans	Crustaceans	Crustaceans	Crustaceans	Crustaceans	Crustaceans
Fish, seafood, amphibians, reptiles and invertebrates	Crustaceans	Shrimps and prawns	Shrimps and prawns	Shrimps and prawns	Shrimps and prawns	Shrimps and prawns
Fish, seafood, amphibians, reptiles and invertebrates	Crustaceans	Shrimps and prawns	Shrimps, common	Shrimps, common	Shrimps, common	Shrimps, common
Fish, seafood, amphibians, reptiles and invertebrates	Crustaceans	Lobsters, spiny-rock lobster	Lobsters	Lobsters	Lobsters	Lobsters
Fish, seafood, amphibians, reptiles and invertebrates	Crustaceans	Lobsters, spiny-rock lobster	Spiny and rock lobsters	Spiny and rock lobsters	Spiny and rock lobsters	Spiny and rock lobsters
Fish, seafood, amphibians, reptiles and invertebrates	Crustaceans	Freshwater crustaceans	Freshwater crayfishes	Freshwater crayfishes	Freshwater crayfishes	Freshwater crayfishes
Fish, seafood, amphibians, reptiles and invertebrates	Fish (meat)	Fish (meat)	Fish (meat)	Fish (meat)	Fish (meat)	Fish (meat)
Fish, seafood, amphibians, reptiles and invertebrates	Fish (meat)	Diadromous fish	River eels	River eels	River eels	River eels
Fish, seafood, amphibians, reptiles and invertebrates	Fish (meat)	Diadromous fish	Salmons, trouts, smelts	Salmons	Salmons	Salmons
Fish, seafood, amphibians, reptiles and invertebrates	Fish (meat)	Diadromous fish	Salmons, trouts, smelts	Trouts	Trouts	Trouts
Fish, seafood, amphibians, reptiles and invertebrates	Fish (meat)	Freshwater fish	Miscellaneous freshwater fishes	Perch	Perch	Perch
Fish, seafood, amphibians, reptiles and invertebrates	Fish (meat)	Freshwater fish	Miscellaneous freshwater fishes	Pike	Pike	Pike
Fish, seafood, amphibians, reptiles and invertebrates	Fish (meat)	Freshwater fish	Miscellaneous freshwater fishes	Pike-perch	Pike-perch	Pike-perch
Fish, seafood, amphibians, reptiles and invertebrates	Fish (meat)	Freshwater fish	Carps, barbels and other cyprinids	Carps	Carps	Carps
Fish, seafood, amphibians, reptiles and invertebrates	Fish (meat)	Freshwater fish	Carps, barbels and other cyprinids	Carps	Crucian carp	Crucian carp
Fish, seafood, amphibians, reptiles and invertebrates	Fish (meat)	Freshwater fish	Carps, barbels and other cyprinids	Freshwater bream - Europe	Freshwater bream - Europe	Freshwater bream - Europe
Fish, seafood, amphibians, reptiles and invertebrates	Fish (meat)	Marine fish	Cods, hakes, haddocks	Cod	Cod	Cod
Fish, seafood, amphibians, reptiles and invertebrates	Fish (meat)	Marine fish	Cods, hakes, haddocks	Haddock	Haddock	Haddock
Fish, seafood, amphibians, reptiles and invertebrates	Fish (meat)	Marine fish	Cods, hakes, haddocks	Hakes	Hakes	Hakes
Fish, seafood, amphibians, reptiles and invertebrates	Fish (meat)	Marine fish	Cods, hakes, haddocks	Whiting	Whiting	Whiting
Fish, seafood, amphibians, reptiles and invertebrates	Fish (meat)	Marine fish	Cods, hakes, haddocks	Pollack, pollock	Pollack, pollock	Pollack, pollock
Fish, seafood, amphibians, reptiles and invertebrates	Fish (meat)	Marine fish	Flounders, halibuts, soles	Halibut	Halibut	Halibut
Fish, seafood, amphibians, reptiles and invertebrates	Fish (meat)	Marine fish	Flounders, halibuts, soles	Plaice	Plaice	Plaice
Fish, seafood, amphibians, reptiles and invertebrates	Fish (meat)	Marine fish	Flounders, halibuts, soles	Sole	Sole	Sole
Fish, seafood, amphibians, reptiles and invertebrates	Fish (meat)	Marine fish	Flounders, halibuts, soles	Turbot	Turbot	Turbot
Fish, seafood, amphibians, reptiles and invertebrates	Fish (meat)	Marine fish	Herrings, sardines, anchovies	Anchovies	Anchovies	Anchovies
Fish, seafood, amphibians, reptiles and invertebrates	Fish (meat)	Marine fish	Herrings, sardines, anchovies	Herrings	Herrings	Herrings
Fish, seafood, amphibians, reptiles and invertebrates	Fish (meat)	Marine fish	Herrings, sardines, anchovies	Sardines and sardine-type fishes	Sardines and sardine-type fishes	Sardines and sardine-type fishes
Fish, seafood, amphibians, reptiles and invertebrates	Fish (meat)	Marine fish	Miscellaneous pelagic marine fishes	Mackerel	Mackerel	Mackerel
Fish, seafood, amphibians, reptiles and invertebrates	Fish (meat)	Marine fish	Tunas, bonitos, billfishes	Tuna	Tuna	Tuna
Fish, seafood, amphibians, reptiles and invertebrates	Molluscs	Mussels	Mussels	Mussels	Mussels	Mussels
Fish, seafood, amphibians, reptiles and invertebrates	Molluscs	Oysters	Oyster, european	Oyster, european	Oyster, european	Oyster, european
Fish, seafood, amphibians, reptiles and invertebrates	Molluscs	Scallops, pectens	Scallops, pectens	Scallops, pectens	Scallops, pectens	Scallops, pectens
Fish, seafood, amphibians, reptiles and invertebrates	Molluscs	Molluscs	Molluscs	Molluscs	Molluscs	Molluscs
Fish, seafood, amphibians, reptiles and invertebrates	Molluscs	Squids, cuttlefishes, octopuses	Cuttlefishes	Cuttlefish, common	Cuttlefish, common	Cuttlefish, common
Fish, seafood, amphibians, reptiles and invertebrates	Fish and seafood processed	Processed or preserved fish (including processed offal)	Canned/jarred fish	Canned herring	Canned herring	Canned herring
Fish, seafood, amphibians, reptiles and invertebrates	Fish and seafood processed	Processed or preserved fish (including processed offal)	Canned/jarred fish	Canned salmon	Canned salmon	Canned salmon
Fish, seafood, amphibians, reptiles and invertebrates	Fish and seafood processed	Processed or preserved fish (including processed offal)	Canned/jarred fish	Canned tunas and similar	Canned tunas and similar	Canned tunas and similar
Fish, seafood, amphibians, reptiles and invertebrates	Fish and seafood processed	Processed or preserved fish (including processed offal)	Canned/jarred fish	Canned/jarred fish	Canned/jarred fish	Canned/jarred fish
Fish, seafood, amphibians, reptiles and invertebrates	Fish and seafood processed	Processed or preserved fish (including processed offal)	Canned/jarred fish	Canned anchovies	Canned anchovies	Canned anchovies
Fish, seafood, amphibians, reptiles and invertebrates	Fish and seafood processed	Processed or preserved fish (including processed offal)	Canned/jarred fish	Canned mackerel	Canned mackerel	Canned mackerel
Fish, seafood, amphibians, reptiles and invertebrates	Fish and seafood processed	Processed or preserved fish (including processed offal)	Canned/jarred fish	Canned sardines	Canned sardines	Canned sardines
Fish, seafood, amphibians, reptiles and invertebrates	Fish and seafood processed	Processed or preserved fish (including processed offal)	Canned/jarred fish	Canned sprats	Canned sprats	Canned sprats
Fish, seafood, amphibians, reptiles and invertebrates	Fish and seafood processed	Processed or preserved fish (including processed offal)	Marinated / pickled fish	Marinated / pickled fish	Marinated / pickled fish	Marinated / pickled fish
Fish, seafood, amphibians, reptiles and invertebrates	Fish and seafood processed	Processed or preserved fish (including processed offal)	Smoked fish	Smoked salmon	Smoked salmon	Smoked salmon
Fish, seafood, amphibians, reptiles and invertebrates	Fish and seafood processed	Processed or preserved fish (including processed offal)	Smoked fish	Smoked herring	Smoked herring	Smoked herring
Fish, seafood, amphibians, reptiles and invertebrates	Fish and seafood processed	Processed or preserved fish (including processed offal)	Smoked fish	Smoked mackerel	Smoked mackerel	Smoked mackerel
Fish, seafood, amphibians, reptiles and invertebrates	Fish and seafood processed	Processed or preserved fish (including processed offal)	Dried fish	Dried fish	Dried fish	Dried fish
Fish, seafood, amphibians, reptiles and invertebrates	Fish and seafood processed	Processed or preserved fish (including processed offal)	Processed or preserved fish (including processed offal)	Processed or preserved fish (including processed offal)	Processed or preserved fish (including processed offal)	Processed or preserved fish (including processed offal)
Fish, seafood, amphibians, reptiles and invertebrates	Fish and seafood processed	Processed or preserved fish (including processed offal)	Structured/textured fish meat products or fish paste	Fish fingers, breaded	Fish fingers, breaded	Fish fingers, breaded
Fish, seafood, amphibians, reptiles and invertebrates	Fish and seafood processed	Processed or preserved fish (including processed offal)	Structured/textured fish meat products or fish paste	Structured/textured fish meat products or fish paste	Structured/textured fish meat products or fish paste	Structured/textured fish meat products or fish paste
Fish, seafood, amphibians, reptiles and invertebrates	Fish and seafood processed	Processed or preserved seafood	Canned seafood	Canned seafood	Canned seafood	Canned seafood
Fish, seafood, amphibians, reptiles and invertebrates	Fish and seafood processed	Processed or preserved seafood	Marinated / pickled seafood	Marinated / pickled seafood	Marinated / pickled seafood	Marinated / pickled seafood
Fish, seafood, amphibians, reptiles and invertebrates	Fish and seafood processed	Processed or preserved seafood	Salted seafood	Salted seafood	Salted seafood	Salted seafood
Fish, seafood, amphibians, reptiles and invertebrates	Amphibians, reptiles, snails, insects	Amphibians and Reptiles	Frogs meat	Frog meat (Rana genus)	Frog meat (Rana genus)	Frog meat (Rana genus)
Fish, seafood, amphibians, reptiles and invertebrates	Amphibians, reptiles, snails, insects	Terrestrial invertebrates	Snails	Snails	Snails	Snails
Fruit and vegetable juices and nectars (including concentrates)	Fruit / vegetable juices and nectars	Fruit / vegetable juices and nectars	Fruit / vegetable juices and nectars	Fruit / vegetable juices and nectars	Fruit / vegetable juices and nectars	Fruit / vegetable juices and nectars
Fruit and vegetable juices and nectars (including concentrates)	Fruit / vegetable juices and nectars	Fruit nectars (min. 25-50% fruit as defined in EU legislation)	Fruit nectars (min. 25-50% fruit as defined in EU legislation)	Fruit nectars (min. 25-50% fruit as defined in EU legislation)	Fruit nectars (min. 25-50% fruit as defined in EU legislation)	Fruit nectars (min. 25-50% fruit as defined in EU legislation)
Fruit and vegetable juices and nectars (including concentrates)	Fruit / vegetable juices and nectars	Fruit nectars (min. 25-50% fruit as defined in EU legislation)	Other fruit nectars	Nectar, banana	Nectar, banana	Nectar, banana
Fruit and vegetable juices and nectars (including concentrates)	Fruit / vegetable juices and nectars	Fruit juices (100% from named source)	Mixed fruit juice	Juice, apricot-orange	Juice, apricot-orange	Juice, apricot-orange
Fruit and vegetable juices and nectars (including concentrates)	Fruit / vegetable juices and nectars	Fruit juices (100% from named source)	Mixed fruit juice	Juice, mixed fruit	Juice, mixed fruit	Juice, mixed fruit
Fruit and vegetable juices and nectars (including concentrates)	Fruit / vegetable juices and nectars	Fruit juices (100% from named source)	Juice, orange	Juice, orange	Juice, orange	Juice, orange
Fruit and vegetable juices and nectars (including concentrates)	Fruit / vegetable juices and nectars	Fruit juices (100% from named source)	Juice, grape	Juice, grape	Juice, grape	Juice, grape
Fruit and vegetable juices and nectars (including concentrates)	Fruit / vegetable juices and nectars	Fruit juices (100% from named source)	Juice, grapefruit	Juice, grapefruit	Juice, grapefruit	Juice, grapefruit
Fruit and vegetable juices and nectars (including concentrates)	Fruit / vegetable juices and nectars	Fruit juices (100% from named source)	Juice, lemon	Juice, lemon	Juice, lemon	Juice, lemon
Fruit and vegetable juices and nectars (including concentrates)	Fruit / vegetable juices and nectars	Fruit juices (100% from named source)	Juice, pineapple	Juice, pineapple	Juice, pineapple	Juice, pineapple
Fruit and vegetable juices and nectars (including concentrates)	Fruit / vegetable juices and nectars	Fruit juices (100% from named source)	Juice, elderberry	Juice, elderberry	Juice, elderberry	Juice, elderberry
Fruit and vegetable juices and nectars (including concentrates)	Fruit / vegetable juices and nectars	Fruit juices (100% from named source)	Juice, pear	Juice, pear	Juice, pear	Juice, pear
Fruit and vegetable juices and nectars (including concentrates)	Fruit / vegetable juices and nectars	Fruit juices (100% from named source)	Juice, black currant	Juice, black currant	Juice, black currant	Juice, black currant
Fruit and vegetable juices and nectars (including concentrates)	Fruit / vegetable juices and nectars	Fruit juices (100% from named source)	Juice, red currant	Juice, red currant	Juice, red currant	Juice, red currant
Fruit and vegetable juices and nectars (including concentrates)	Fruit / vegetable juices and nectars	Fruit juices (100% from named source)	Fruit juices (100% from named source)	Fruit juices (100% from named source)	Fruit juices (100% from named source)	Fruit juices (100% from named source)
Fruit and vegetable juices and nectars (including concentrates)	Fruit / vegetable juices and nectars	Vegetable juices	Juice, carrot	Juice, carrot	Juice, carrot	Juice, carrot
Fruit and vegetable juices and nectars (including concentrates)	Fruit / vegetable juices and nectars	Vegetable juices	Juice, tomato	Juice, tomato	Juice, tomato	Juice, tomato
Fruit and vegetable juices and nectars (including concentrates)	Fruit / vegetable juices and nectars	Vegetable juices	Vegetable juices	Vegetable juices	Vegetable juices	Vegetable juices
Fruit and vegetable juices and nectars (including concentrates)	Fruit / vegetable juices and nectars	Vegetable juices	Other vegetable juices	Juice, beetroot	Juice, beetroot	Juice, beetroot
Fruit and vegetable juices and nectars (including concentrates)	Fruit / vegetable juices and nectars	Vegetable juices	Other vegetable juices	Juice, celery	Juice, celery	Juice, celery
Fruit and vegetable juices and nectars (including concentrates)	Fruit / vegetable juices and nectars	Vegetable juices	Other vegetable juices	Juice, white cabbage	Juice, white cabbage	Juice, white cabbage
Fruit and vegetable juices and nectars (including concentrates)	Fruit / vegetable juices and nectars	Other (mixed) fruit and vegetable juices or nectars	Mixed juices with added ingredients	Multivitamin juices	Multivitamin juices	Multivitamin juices
Fruit and vegetable juices and nectars (including concentrates)	Extracts of plant origin	Liquid extract of plant origin	Coconut milk (cocos nucifera) liquid	Coconut milk (cocos nucifera) liquid	Coconut milk (cocos nucifera) liquid	Coconut milk (cocos nucifera) liquid
Grains and grain-based products	Breakfast cereals	Cereal bars	Cereal bars	Cereal bars	Cereal bars	Cereal bars
Grains and grain-based products	Breakfast cereals	Muesli and similar mixed breakfast cereals	Muesli and similar mixed breakfast cereals	Muesli and similar mixed breakfast cereals	Muesli and similar mixed breakfast cereals	Muesli and similar mixed breakfast cereals
Grains and grain-based products	Breakfast cereals	Muesli and similar mixed breakfast cereals	Muesli plain	Muesli plain	Muesli plain	Muesli plain
Grains and grain-based products	Breakfast cereals	Breakfast cereals, plain	Porridge (ready to eat)	Porridge milk based (ready to eat)	Porridge milk based (ready to eat)	Porridge milk based (ready to eat)
Grains and grain-based products	Breakfast cereals	Breakfast cereals, plain	Porridge (in dry form, to be diluted)	Rye porridge	Rye porridge	Rye porridge
Grains and grain-based products	Breakfast cereals	Processed and mixed breakfast cereals	Popped cereals	Wheat, popped	Wheat, popped	Wheat, popped
Grains and grain-based products	Breakfast cereals	Processed and mixed breakfast cereals	Popped cereals	Oat popped	Oat popped	Oat popped
Grains and grain-based products	Breakfast cereals	Processed and mixed breakfast cereals	Popped cereals	Popcorn (maize, popped)	Popcorn (maize, popped)	Popcorn (maize, popped)
Grains and grain-based products	Breakfast cereals	Processed and mixed breakfast cereals	Cereal flakes and similar	Processed maize-based flakes	Processed maize-based flakes	Processed maize-based flakes
Grains and grain-based products	Breakfast cereals	Processed and mixed breakfast cereals	Cereal flakes and similar	Processed oat-based flakes	Oat high-bran flakes	Oat high-bran flakes
Grains and grain-based products	Breakfast cereals	Processed and mixed breakfast cereals	Cereal flakes and similar	Processed oat-based flakes	Processed oat-based flakes	Processed oat-based flakes
Grains and grain-based products	Breakfast cereals	Processed and mixed breakfast cereals	Cereal flakes and similar	Processed rye-based flakes	Processed rye-based flakes	Processed rye-based flakes
Grains and grain-based products	Breakfast cereals	Processed and mixed breakfast cereals	Cereal flakes and similar	Cereal flakes and similar	Cereal flakes and similar	Cereal flakes and similar
Grains and grain-based products	Breakfast cereals	Processed and mixed breakfast cereals	Cereal flakes and similar	Processed barley-based flakes	Processed barley-based flakes	Processed barley-based flakes
Grains and grain-based products	Breakfast cereals	Processed and mixed breakfast cereals	Cereal flakes and similar	Processed wheat-based flakes	Processed wheat-based flakes	Processed wheat-based flakes
Grains and grain-based products	Fine bakery wares	Fine bakery wares	Fine bakery wares	Fine bakery wares	Fine bakery wares	Fine bakery wares
Grains and grain-based products	Fine bakery wares	Choux pastry	Profiterole	Profiterole	Profiterole	Profiterole
Grains and grain-based products	Fine bakery wares	Choux pastry	eclair	eclair	eclair	eclair
Grains and grain-based products	Fine bakery wares	Choux pastry	Beignets	Beignets	Beignets	Beignets
Grains and grain-based products	Fine bakery wares	Biscuits	Biscuits, sweet, plain	Biscuits, sweet, wheat wholemeal	Biscuits, sweet, wheat wholemeal	Biscuits, sweet, wheat wholemeal
Grains and grain-based products	Fine bakery wares	Biscuits	Biscuits, sweet, plain	Biscuits, sweet, plain	Biscuits, sweet, plain	Biscuits, sweet, plain
Grains and grain-based products	Fine bakery wares	Biscuits	Biscuits, sweet, plain	Butter biscuits	Butter biscuits	Butter biscuits
Grains and grain-based products	Fine bakery wares	Biscuits	Biscuits, sweet, plain	Speculaas	Speculaas	Speculaas
Grains and grain-based products	Fine bakery wares	Biscuits	Biscuits, sweet, plain	Biscuits, chocolate	Biscuits, chocolate	Biscuits, chocolate
Grains and grain-based products	Fine bakery wares	Biscuits	Biscuits	Biscuits	Biscuits	Biscuits
Grains and grain-based products	Fine bakery wares	Biscuits	Biscuit with inclusions, filling or coating	Wafers	Wafers	Wafers
Grains and grain-based products	Fine bakery wares	Biscuits	Biscuit with inclusions, filling or coating	Biscuit with inclusions, filling or coating	Biscuit with inclusions, filling or coating	Biscuit with inclusions, filling or coating
Grains and grain-based products	Fine bakery wares	Cakes	Cakes	Cakes	Cakes	Cakes
Grains and grain-based products	Fine bakery wares	Cakes	Chocolate-based cakes	Cake marbled, with chocolate	Cake marbled, with chocolate	Cake marbled, with chocolate
Grains and grain-based products	Fine bakery wares	Cakes	Chocolate-based cakes	Chocolate cake	Chocolate cake	Chocolate cake
Grains and grain-based products	Fine bakery wares	Cakes	Plain cakes	Sponge cake	Sponge cake	Sponge cake
Grains and grain-based products	Fine bakery wares	Cakes	Plain cakes	Sponge cake	Sponge cake roll	Sponge cake roll
Grains and grain-based products	Fine bakery wares	Cakes	Plain cakes	Cream cake	Cream cake	Cream cake
Grains and grain-based products	Fine bakery wares	Cakes	Plain cakes	Cream cake	Cream custard sponge cake	Cream custard sponge cake
Grains and grain-based products	Fine bakery wares	Cakes	Plain cakes	Cream cake	Cheese cake	Cheese cream sponge cake
Grains and grain-based products	Fine bakery wares	Cakes	Plain cakes	Cream cake	Cheese cake	Cheese cake
Grains and grain-based products	Fine bakery wares	Cakes	Plain cakes	Fruit cake	Fruit cake	Fruit cake
Grains and grain-based products	Fine bakery wares	Cakes	Plain cakes	Muffins	Muffins	Muffins
Grains and grain-based products	Fine bakery wares	Cakes	Plain cakes	Rotation cooked layered cakes	Baumkuchen and similar	Baumkuchen and similar
Grains and grain-based products	Fine bakery wares	Pastry based on laminated dough	Apple strudel	Apple strudel	Apple strudel	Apple strudel
Grains and grain-based products	Fine bakery wares	Pastry based on laminated dough	Cream-cheese strudel	Cream-cheese strudel	Cream-cheese strudel	Cream-cheese strudel
Grains and grain-based products	Fine bakery wares	Pastry based on laminated dough	Croissant from puff pastry	Croissant from puff pastry	Croissant from puff pastry	Croissant from puff pastry
Grains and grain-based products	Fine bakery wares	Pastry based on laminated dough	Pastry based on laminated dough	Pastry based on laminated dough	Pastry based on laminated dough	Pastry based on laminated dough
Grains and grain-based products	Fine bakery wares	Shortcrust (pies -tarts)	Fruit pie-tarts	Fruit pie-tarts	Fruit pie-tarts	Fruit pie-tarts
Grains and grain-based products	Fine bakery wares	Shortcrust (pies -tarts)	Shortcrust (pies -tarts)	Shortcrust (pies -tarts)	Shortcrust (pies -tarts)	Shortcrust (pies -tarts)
Grains and grain-based products	Fine bakery wares	Shortcrust (pies -tarts)	Flan tart	Rhubarb flan	Rhubarb flan	Rhubarb flan
Grains and grain-based products	Fine bakery wares	Various pastry	Pancakes	Pancakes	Pancakes	Pancakes
Grains and grain-based products	Fine bakery wares	Various pastry	Waffles	Waffles	Waffles	Waffles
Grains and grain-based products	Fine bakery wares	Various pastry	Macaroons	Macaroons	Macaroons	Macaroons
Grains and grain-based products	Fine bakery wares	Various pastry	Dumpling, sweet	Dumpling, sweet	Dumpling, sweet	Dumpling, sweet
Grains and grain-based products	Fine bakery wares	Various pastry	Spice cakes	Gingerbread	Gingerbread	Gingerbread
Grains and grain-based products	Fine bakery wares	Various pastry	Spice cakes	Lebkuchen	Lebkuchen	Lebkuchen
Grains and grain-based products	Fine bakery wares	Various pastry	Spice cakes	Spice cakes	Spice cakes	Spice cakes
Grains and grain-based products	Fine bakery wares	Various pastry	Meringue	Meringue	Meringue	Meringue
Grains and grain-based products	Fine bakery wares	Various pastry	Various pastry	Various pastry	Various pastry	Various pastry
Grains and grain-based products	Fine bakery wares	Yeast leavened pastry	Croissant	Croissant	Croissant	Croissant
Grains and grain-based products	Fine bakery wares	Yeast leavened pastry	Croissant	Croissant, filled with chocolate	Croissant, filled with chocolate	Croissant, filled with chocolate
Grains and grain-based products	Fine bakery wares	Yeast leavened pastry	Croissant	Croissant, filled with cream	Croissant, filled with cream	Croissant, filled with cream
Grains and grain-based products	Fine bakery wares	Yeast leavened pastry	Brioche type products	Brioche type products	Brioche type products	Brioche type products
Grains and grain-based products	Fine bakery wares	Yeast leavened pastry	Doughnuts-berliner	Doughnuts-berliner	Doughnuts-berliner	Doughnuts-berliner
Grains and grain-based products	Bread and similar products	Additional bread products	Breadcrumbs	Breadcrumbs	Breadcrumbs	Breadcrumbs
Grains and grain-based products	Bread and similar products	Additional bread products	Additional bread products	Additional bread products	Additional bread products	Additional bread products
Grains and grain-based products	Bread and similar products	Crackers and breadsticks	Sticks, salty	Sticks, salty	Sticks, salty	Sticks, salty
Grains and grain-based products	Bread and similar products	Crackers and breadsticks	Crackers and breadsticks	Crackers and breadsticks	Crackers and breadsticks	Crackers and breadsticks
Grains and grain-based products	Bread and similar products	Crisp bread	Crisp bread	Crisp bread	Crisp bread	Crisp bread
Grains and grain-based products	Bread and similar products	Crisp bread	Rye crisp bread	Crisp bread, rye, refined flour	Crisp bread, rye, refined flour	Crisp bread, rye, refined flour
Grains and grain-based products	Bread and similar products	Crisp bread	Wheat crisp bread	Crisp bread, wheat, wholemeal	Crisp bread, wheat, wholemeal	Crisp bread, wheat, wholemeal
Grains and grain-based products	Bread and similar products	Crisp bread	Wheat crisp bread	Crisp bread, wheat, refined flour	Crisp bread, wheat, refined flour	Crisp bread, wheat, refined flour
Grains and grain-based products	Bread and similar products	Leavened bread and similar	Wheat bread and rolls	Wheat bread and rolls, brown or wholemeal	Wheat bread and rolls, brown or wholemeal	Wheat bread and rolls, brown or wholemeal
Grains and grain-based products	Bread and similar products	Leavened bread and similar	Wheat bread and rolls	Wheat bread and rolls, semi-brown	Wheat bread and rolls, semi-brown	Wheat bread and rolls, semi-brown
Grains and grain-based products	Bread and similar products	Leavened bread and similar	Wheat bread and rolls	Wheat bread and rolls, white (refined flour)	Wheat bread and rolls, white (refined flour)	Wheat bread and rolls, white (refined flour)
Grains and grain-based products	Bread and similar products	Leavened bread and similar	Wheat bread and rolls	Wheat bread and rolls, white (refined flour)	Wheat bread and rolls, white with maize	Wheat bread and rolls, white with maize
Grains and grain-based products	Bread and similar products	Leavened bread and similar	Wheat bread and rolls	Wheat bread and rolls, white (refined flour)	Wheat bread and rolls, white with potato	Wheat bread and rolls, white with potato
Grains and grain-based products	Bread and similar products	Leavened bread and similar	Wheat bread and rolls	Wheat bread and rolls, white (refined flour)	Wheat bread and rolls, white with rice	Wheat bread and rolls, white with rice
Grains and grain-based products	Bread and similar products	Leavened bread and similar	Wheat bread and rolls	Wheat bread and rolls, white (refined flour)	Wheat bread and rolls, white with soya	Wheat bread and rolls, white with soya
Grains and grain-based products	Bread and similar products	Leavened bread and similar	Multigrain bread and rolls	Mixed wheat and rye bread and rolls	Mixed wheat and rye bread and rolls	Mixed wheat and rye bread and rolls
Grains and grain-based products	Bread and similar products	Leavened bread and similar	Multigrain bread and rolls	Mixed wheat and rye bread and rolls	Rye-wheat bread and rolls, wholemeal	Rye-wheat bread and rolls, wholemeal
Grains and grain-based products	Bread and similar products	Leavened bread and similar	Multigrain bread and rolls	Multigrain (not only rye-wheat) bread and rolls	Multigrain (not only rye-wheat) bread and rolls	Multigrain (not only rye-wheat) bread and rolls
Grains and grain-based products	Bread and similar products	Leavened bread and similar	Bread and rolls with special ingredients added	Bread and rolls with special ingredients added	Bread and rolls with special ingredients added	Bread and rolls with special ingredients added
Grains and grain-based products	Bread and similar products	Leavened bread and similar	Leavened bread and similar	Leavened bread and similar	Leavened bread and similar	Leavened bread and similar
Grains and grain-based products	Bread and similar products	Leavened bread and similar	Rye only bread and rolls	Pumpernickel	Pumpernickel	Pumpernickel
Grains and grain-based products	Bread and similar products	Leavened bread and similar	Rye only bread and rolls	Rye bread and rolls, refined flour	Rye bread and rolls, refined flour	Rye bread and rolls, refined flour
Grains and grain-based products	Bread and similar products	Leavened bread and similar	Rye only bread and rolls	Rye bread and rolls, wholemeal	Rye bread and rolls, wholemeal	Rye bread and rolls, wholemeal
Grains and grain-based products	Bread and similar products	Leavened bread and similar	Rye only bread and rolls	Rye only bread and rolls	Rye only bread and rolls	Rye only bread and rolls
Grains and grain-based products	Bread and similar products	Unleavened or flat bread and similar	Unleavened or flat bread and similar	Unleavened or flat bread and similar	Unleavened or flat bread and similar	Unleavened or flat bread and similar
Grains and grain-based products	Bread and similar products	Unleavened or flat bread and similar	Traditional unleavened breads	Pita bread	Pita bread	Pita bread
Grains and grain-based products	Bread and similar products	Unleavened or flat bread and similar	Traditional unleavened breads	Tortilla	Tortilla	Tortilla
Grains and grain-based products	Bread and similar products	Unleavened or flat bread and similar	Traditional unleavened breads	Chapati	Chapati	Chapati
Grains and grain-based products	Bread and similar products	Bread alternative	Pretzels	Pretzels	Pretzels	Pretzels
Grains and grain-based products	Bread and similar products	Rusk	Rusk, wholemeal	Rusk, wholemeal	Rusk, wholemeal	Rusk, wholemeal
Grains and grain-based products	Bread and similar products	Rusk	Rusk, refined flour	Rusk, refined flour	Rusk, refined flour	Rusk, refined flour
Grains and grain-based products	Cereals and cereal primary derivatives	Cereal and cereal-like flours	Oat flour	Oat flour	Oat flour	Oat flour
Grains and grain-based products	Cereals and cereal primary derivatives	Cereal and cereal-like flours	Buckwheat flour	Buckwheat flour	Buckwheat flour	Buckwheat flour
Grains and grain-based products	Cereals and cereal primary derivatives	Cereal and cereal-like flours	Cereal and cereal-like flours	Cereal and cereal-like flours	Cereal and cereal-like flours	Cereal and cereal-like flours
Grains and grain-based products	Cereals and cereal primary derivatives	Cereal and cereal-like flours	Wheat flour	Wheat flour	Wheat flour	Wheat flour
Grains and grain-based products	Cereals and cereal primary derivatives	Cereal and cereal-like flours	Spelt flour	Spelt flour	Spelt flour	Spelt flour
Grains and grain-based products	Cereals and cereal primary derivatives	Cereal and cereal-like flours	Rye flour	Rye flour, wholemeal	Rye flour, wholemeal	Rye flour, wholemeal
Grains and grain-based products	Cereals and cereal primary derivatives	Groats	Buckwheat groats	Buckwheat groats	Buckwheat groats	Buckwheat groats
Grains and grain-based products	Cereals and cereal primary derivatives	Groats	Wheat groats	Wheat groats	Wheat groats	Wheat groats
Grains and grain-based products	Cereals and cereal primary derivatives	Groats	Millet groats	Millet groats	Millet groats	Millet groats
Grains and grain-based products	Cereals and cereal primary derivatives	Groats	Oat groats	Oat groats	Oat groats	Oat groats
Grains and grain-based products	Cereals and cereal primary derivatives	Groats	Groats	Groats	Groats	Groats
Grains and grain-based products	Cereals and cereal primary derivatives	Semolina	Semolina	Semolina	Semolina	Semolina
Grains and grain-based products	Cereals and cereal primary derivatives	Semolina	Wheat semolina	Wheat semolina	Wheat semolina	Wheat semolina
Grains and grain-based products	Cereals and cereal primary derivatives	Cereal bran	Wheat bran	Wheat bran	Wheat bran	Wheat bran
Grains and grain-based products	Cereals and cereal primary derivatives	Cereal bran	Cereal bran	Cereal bran	Cereal bran	Cereal bran
Grains and grain-based products	Cereals and cereal primary derivatives	Cereal grains (and cereal-like grains)	Rice and similar-	Indian rice grain	Indian rice grain	Indian rice grain
Grains and grain-based products	Cereals and cereal primary derivatives	Cereal grains (and cereal-like grains)	Common millet and similar-	Common millet and similar-	Common millet and similar-	Common millet and similar-
Grains and grain-based products	Cereals and cereal primary derivatives	Cereal grains (and cereal-like grains)	Maize and similar-	Maize and similar-	Maize and similar-	Maize and similar-
Grains and grain-based products	Cereals and cereal primary derivatives	Cereal grains (and cereal-like grains)	Wheat and similar-	Spelt grain	Spelt grain	Spelt grain
Grains and grain-based products	Cereals and cereal primary derivatives	Cereal grains (and cereal-like grains)	Wheat and similar-	Common wheat grain	Common wheat grain	Common wheat grain
Grains and grain-based products	Cereals and cereal primary derivatives	Cereal grains (and cereal-like grains)	Barley and similar-	Barley grains	Barley grain, pearled	Barley grain, pearled
Grains and grain-based products	Cereals and cereal primary derivatives	Cereal grains (and cereal-like grains)	Buckwheat and other pseudo-cereals and similar-	Buckwheat	Buckwheat	Buckwheat
Grains and grain-based products	Cereals and cereal primary derivatives	Cereal grains (and cereal-like grains)	Rye and similar-	Rye grain	Rye grain	Rye grain
Grains and grain-based products	Cereals and cereal primary derivatives	Cereal germ	Wheat germ	Wheat germ	Wheat germ	Wheat germ
Grains and grain-based products	Pasta, doughs and similar products	Pasta and similar products	Pasta, plain (not stuffed), uncooked	Dried pasta	Dried durum pasta	Dried durum pasta
Grains and grain-based products	Pasta, doughs and similar products	Pasta and similar products	Pasta, plain (not stuffed), uncooked	Dried pasta	Dried pasta	Dried pasta
Grains and grain-based products	Pasta, doughs and similar products	Pasta and similar products	Pasta, plain (not stuffed), uncooked	Pasta wholemeal	Pasta wholemeal	Pasta wholemeal
Grains and grain-based products	Pasta, doughs and similar products	Pasta and similar products	Pasta, plain (not stuffed), uncooked	Pasta, plain (not stuffed), uncooked	Pasta, plain (not stuffed), uncooked	Pasta, plain (not stuffed), uncooked
Grains and grain-based products	Pasta, doughs and similar products	Pasta and similar products	Pasta-like products	Glass noodle	Glass noodle	Glass noodle
Grains and grain-based products	Pasta, doughs and similar products	Pasta and similar products	Pasta-like products	Couscous	Couscous	Couscous
Grains and grain-based products	Pasta, doughs and similar products	Pasta and similar products	Pasta-like products	Gnocchi	Gnocchi	Gnocchi
Grains and grain-based products	Pasta, doughs and similar products	Raw doughs and pre-mixes	Cake pre-mixes/batter	Cake pre-mixes/batter	Cake pre-mixes/batter	Cake pre-mixes/batter
Legumes, nuts, oilseeds and spices	Spices	Spices	Spices	Spices	Spices	Spices
Legumes, nuts, oilseeds and spices	Spices	Dried herbs	Dried herbs	Dried herbs	Dried herbs	Dried herbs
Legumes, nuts, oilseeds and spices	Spices	Dried herbs	Mints, dry	Mints, dry	Mints, dry	Mints, dry
Legumes, nuts, oilseeds and spices	Spices	Dried herbs	Rosemary, dry	Rosemary, dry	Rosemary, dry	Rosemary, dry
Legumes, nuts, oilseeds and spices	Spices	Dried herbs	Basil, dry	Basil, dry	Basil, dry	Basil, dry
Legumes, nuts, oilseeds and spices	Spices	Dried herbs	Bay leaves, dry	Bay leaves, dry	Bay leaves, dry	Bay leaves, dry
Legumes, nuts, oilseeds and spices	Spices	Dried herbs	Marjoram, dry	Marjoram, dry	Marjoram, dry	Marjoram, dry
Legumes, nuts, oilseeds and spices	Spices	Dried herbs	Thyme, dry	Thyme, dry	Thyme, dry	Thyme, dry
Legumes, nuts, oilseeds and spices	Spices	Bud spices	Capers buds and similar-	Capers buds	Capers buds	Capers buds
Legumes, nuts, oilseeds and spices	Spices	Fruit spices	Peppercorn (black, green and white) and similar-	Peppercorn (black, green and white)	Peppercorn (black, green and white)	Peppercorn (black, green and white)
Legumes, nuts, oilseeds and spices	Spices	Fruit spices	Other fruit spices	Peppers, dried	Paprika powder	Paprika powder
Legumes, nuts, oilseeds and spices	Spices	Fruit spices	Other fruit spices	Peppers, dried	Peppers, dried	Peppers, dried
Legumes, nuts, oilseeds and spices	Spices	Root and rhizome spices	Ginger roots and similar-	Ginger roots	Ginger roots	Ginger roots
Legumes, nuts, oilseeds and spices	Legumes	Pulses (dried legume seeds)	Beans (dry) and similar-	Broad beans (dry)	Broad beans (dry)	Broad beans (dry)
Legumes, nuts, oilseeds and spices	Legumes	Pulses (dried legume seeds)	Beans (dry) and similar-	Borlotti or other common beans (dry)	Borlotti or other common beans (dry)	Borlotti or other common beans (dry)
Legumes, nuts, oilseeds and spices	Legumes	Pulses (dried legume seeds)	Beans (dry) and similar-	Borlotti or other common beans (dry)	Kidney bean (dry seeds)	Kidney bean (dry seeds)
Legumes, nuts, oilseeds and spices	Legumes	Pulses (dried legume seeds)	Beans (dry) and similar-	Soyabeans for consumption (dry)	Soyabeans for consumption (dry)	Soyabeans for consumption (dry)
Legumes, nuts, oilseeds and spices	Legumes	Pulses (dried legume seeds)	Lentils (dry) and similar-	Lentils (dry)	Lentils (dry)	Lentils (dry)
Legumes, nuts, oilseeds and spices	Legumes	Pulses (dried legume seeds)	Peas (dry) and similar-	Chickpeas (dry)	Chickpeas (dry)	Chickpeas (dry)
Legumes, nuts, oilseeds and spices	Legumes	Pulses (dried legume seeds)	Peas (dry) and similar-	Garden peas (dry)	Garden peas (dry)	Garden peas (dry)
Legumes, nuts, oilseeds and spices	Legumes	Pulses (dried legume seeds)	Pulses (dried legume seeds)	Pulses (dried legume seeds)	Pulses (dried legume seeds)	Pulses (dried legume seeds)
Legumes, nuts, oilseeds and spices	Legumes	Legumes fresh seeds (beans, peas etc.)	Beans (fresh seeds without pods) and similar-	Borlotti or other common beans (without pods)	Borlotti or other common beans (without pods)	Borlotti or other common beans (without pods)
Legumes, nuts, oilseeds and spices	Legumes	Legumes fresh seeds (beans, peas etc.)	Beans (fresh seeds without pods) and similar-	Borlotti or other common beans (without pods)	Kidney bean (fresh seeds)	Kidney bean (fresh seeds)
Legumes, nuts, oilseeds and spices	Legumes	Legumes fresh seeds (beans, peas etc.)	Beans (fresh seeds without pods) and similar-	Broad beans (without pods)	Broad beans (without pods)	Broad beans (without pods)
Legumes, nuts, oilseeds and spices	Legumes	Legumes fresh seeds (beans, peas etc.)	Beans (fresh seeds without pods) and similar-	Mung beans (without pods)	Mung beans (without pods)	Mung beans (without pods)
Legumes, nuts, oilseeds and spices	Legumes	Legumes fresh seeds (beans, peas etc.)	Beans (fresh seeds without pods) and similar-	Soyabeans (without pods)	Soyabeans (without pods)	Soyabeans (without pods)
Legumes, nuts, oilseeds and spices	Legumes	Legumes fresh seeds (beans, peas etc.)	Peas (without pods) and similar-	Garden peas (without pods)	Garden peas (without pods)	Garden peas (without pods)
Legumes, nuts, oilseeds and spices	Legumes	Legumes fresh seeds (beans, peas etc.)	Peas (without pods) and similar-	Chickpeas (without pods)	Chickpeas (without pods)	Chickpeas (without pods)
Legumes, nuts, oilseeds and spices	Legumes	Legumes fresh seeds (beans, peas etc.)	Lentils (without pods)	Lentils (without pods)	Lentils (without pods)	Lentils (without pods)
Legumes, nuts, oilseeds and spices	Nuts, oilseeds and oilfruits	Tree nuts	Tree nuts	Tree nuts	Tree nuts	Tree nuts
Legumes, nuts, oilseeds and spices	Nuts, oilseeds and oilfruits	Tree nuts	Almonds and similar-	Almonds	Almonds sweet	Almonds sweet
Legumes, nuts, oilseeds and spices	Nuts, oilseeds and oilfruits	Tree nuts	Brazil nuts and similar-	Brazil nuts	Brazil nuts	Brazil nuts
Legumes, nuts, oilseeds and spices	Nuts, oilseeds and oilfruits	Tree nuts	Hazelnuts and similar-	Hazelnuts	Hazelnuts	Hazelnuts
Legumes, nuts, oilseeds and spices	Nuts, oilseeds and oilfruits	Tree nuts	Pistachios and similar-	Pistachios	Pistachios	Pistachios
Legumes, nuts, oilseeds and spices	Nuts, oilseeds and oilfruits	Tree nuts	Walnuts and similar-	Walnuts	Walnuts	Walnuts
Legumes, nuts, oilseeds and spices	Nuts, oilseeds and oilfruits	Tree nuts	Cashew nuts and similar-	Cashew nuts	Cashew nuts	Cashew nuts
Legumes, nuts, oilseeds and spices	Nuts, oilseeds and oilfruits	Tree nuts	Chestnuts and similar-	Chestnuts	Chestnuts	Chestnuts
Legumes, nuts, oilseeds and spices	Nuts, oilseeds and oilfruits	Tree nuts	Coconuts and similar-	Coconuts	Coconuts	Coconuts
Legumes, nuts, oilseeds and spices	Nuts, oilseeds and oilfruits	Tree nuts	Macadamias and similar-	Macadamias	Macadamia integrifolia	Macadamia integrifolia
Legumes, nuts, oilseeds and spices	Nuts, oilseeds and oilfruits	Tree nuts	Pine nut kernels and similar-	Pine nut kernels	Stone pine nut kernels	Stone pine nut kernels
Legumes, nuts, oilseeds and spices	Nuts, oilseeds and oilfruits	Oilseeds	Oilseeds	Oilseeds	Oilseeds	Oilseeds
Legumes, nuts, oilseeds and spices	Nuts, oilseeds and oilfruits	Oilseeds	Linseeds and similar-	Linseeds	Linseeds	Linseeds
Legumes, nuts, oilseeds and spices	Nuts, oilseeds and oilfruits	Oilseeds	Peanuts and similar-	Peanuts	Peanuts	Peanuts
Legumes, nuts, oilseeds and spices	Nuts, oilseeds and oilfruits	Oilseeds	Pumpkin seeds and similar-	Pumpkin seeds	Pumpkin seeds	Pumpkin seeds
Legumes, nuts, oilseeds and spices	Nuts, oilseeds and oilfruits	Oilseeds	Poppy seeds and similar-	Poppy seeds	Poppy seeds	Poppy seeds
Legumes, nuts, oilseeds and spices	Nuts, oilseeds and oilfruits	Oilseeds	Sesame seeds and similar-	Sesame seeds	Sesame seeds	Sesame seeds
Legumes, nuts, oilseeds and spices	Nuts, oilseeds and oilfruits	Oilseeds	Sunflower seeds and similar-	Sunflower seeds	Sunflower seeds	Sunflower seeds
Legumes, nuts, oilseeds and spices	Processed legumes, nuts, oilseeds and spices	Canned or jarred legumes	Canned or jarred legumes	Canned or jarred legumes	Canned or jarred legumes	Canned or jarred legumes
Legumes, nuts, oilseeds and spices	Processed legumes, nuts, oilseeds and spices	Canned or jarred legumes	Canned or jarred chickpea	Canned or jarred chickpea	Canned or jarred chickpea	Canned or jarred chickpea
Legumes, nuts, oilseeds and spices	Processed legumes, nuts, oilseeds and spices	Canned or jarred legumes	Canned or jarred common beans	Canned or jarred common beans	Canned or jarred common beans	Canned or jarred common beans
Legumes, nuts, oilseeds and spices	Processed legumes, nuts, oilseeds and spices	Canned or jarred legumes	Canned or jarred lentils	Canned or jarred lentils	Canned or jarred lentils	Canned or jarred lentils
Legumes, nuts, oilseeds and spices	Processed legumes, nuts, oilseeds and spices	Canned or jarred legumes	Canned or jarred peas	Canned or jarred peas	Canned or jarred peas	Canned or jarred peas
Legumes, nuts, oilseeds and spices	Processed legumes, nuts, oilseeds and spices	Primary derivatives from nuts and similar seeds	Candied or sugar preserved nuts	Candied or sugar preserved nuts	Candied or sugar preserved nuts	Candied or sugar preserved nuts
Legumes, nuts, oilseeds and spices	Processed legumes, nuts, oilseeds and spices	Primary derivatives from nuts and similar seeds	Nut/seeds paste/emulsion/mass	Nut/seeds paste/emulsion/mass	Nut/seeds paste/emulsion/mass	Nut/seeds paste/emulsion/mass
Legumes, nuts, oilseeds and spices	Processed legumes, nuts, oilseeds and spices	Primary derivatives from nuts and similar seeds	Nut/seeds paste/emulsion/mass	Peanut butter	Peanut butter	Peanut butter
Legumes, nuts, oilseeds and spices	Processed legumes, nuts, oilseeds and spices	Primary derivatives from nuts and similar seeds	Nut/seeds paste/emulsion/mass	Chestnut puree (castanea vulgaris)	Chestnut puree (castanea vulgaris)	Chestnut puree (castanea vulgaris)
Legumes, nuts, oilseeds and spices	Processed legumes, nuts, oilseeds and spices	Primary derivatives from nuts and similar seeds	Nut/seeds paste/emulsion/mass	Sesame paste (tahini) (sesamus indicum)	Sesame paste (tahini) (sesamus indicum)	Sesame paste (tahini) (sesamus indicum)
Legumes, nuts, oilseeds and spices	Processed legumes, nuts, oilseeds and spices	Primary derivatives from nuts and similar seeds	Dried nuts and related flours and powders	Dried nuts and related flours and powders	Dried nuts and related flours and powders	Dried nuts and related flours and powders
Meat and meat products	Sausages	Sausages	Sausages	Sausages	Sausages	Sausages
Meat and meat products	Sausages	Preserved or partly preserved sausages	Cooked sausages (generic)	Cooked sausages (generic)	Cooked sausages (generic)	Cooked sausages (generic)
Meat and meat products	Sausages	Preserved or partly preserved sausages	Cured ripened raw sausages	Cured ripened raw sausages	Cured ripened raw sausages	Cured ripened raw sausages
Meat and meat products	Sausages	Preserved or partly preserved sausages	Cured ripened raw sausages	Salami-type sausage	German salami	German salami
Meat and meat products	Sausages	Preserved or partly preserved sausages	Cured ripened raw sausages	Salami-type sausage	Italian-type salami	Italian-type salami
Meat and meat products	Sausages	Preserved or partly preserved sausages	Cured ripened raw sausages	Salami-type sausage	Hungarian-type salami	Hungarian-type salami
Meat and meat products	Sausages	Preserved or partly preserved sausages	Cured ripened raw sausages	Salami-type sausage	Salami-type sausage	Salami-type sausage
Meat and meat products	Sausages	Preserved or partly preserved sausages	Cured ripened raw sausages	Pepperoni/paprika-type sausage	Snack sausages (like Cabanos and landjager)	Snack sausages (like Cabanos and landjager)
Meat and meat products	Sausages	Preserved or partly preserved sausages	Preserved or partly preserved sausages	Preserved or partly preserved sausages	Preserved or partly preserved sausages	Preserved or partly preserved sausages
Meat and meat products	Sausages	Preserved or partly preserved sausages	Sliceable or firm cooked sausages	Blood-type sausage	Blood-type sausage	Blood-type sausage
Meat and meat products	Sausages	Preserved or partly preserved sausages	Sliceable or firm cooked sausages	Mortadella-type sausage	Mortadella-type sausage	Mortadella-type sausage
Meat and meat products	Sausages	Preserved or partly preserved sausages	Sliceable or firm cooked sausages	Sliceable or firm cooked sausages	Sliceable or firm cooked sausages	Sliceable or firm cooked sausages
Meat and meat products	Sausages	Preserved or partly preserved sausages	Sliceable or firm cooked sausages	Miscellaneous cooked sausages	Cooked salami	Cooked salami
Meat and meat products	Sausages	Preserved or partly preserved sausages	Sliceable or firm cooked sausages	Miscellaneous cooked sausages	Head cheese	Head cheese
Meat and meat products	Sausages	Preserved or partly preserved sausages	Pre-cooked sausages to be cooked before consumption	Weisswurst	Weisswurst	Weisswurst
Meat and meat products	Sausages	Preserved or partly preserved sausages	Pre-cooked sausages to be cooked before consumption	Cooked bratwurst-type sausage	Bockwurst	Bockwurst
Meat and meat products	Sausages	Preserved or partly preserved sausages	Pre-cooked sausages to be cooked before consumption	Cooked bratwurst-type sausage	Beerwurst	Beerwurst
Meat and meat products	Sausages	Preserved or partly preserved sausages	Pre-cooked sausages to be cooked before consumption	Cooked bratwurst-type sausage	Cooked bratwurst-type sausage	Cooked bratwurst-type sausage
Meat and meat products	Sausages	Preserved or partly preserved sausages	Pre-cooked sausages to be cooked before consumption	Knackwurst-type sausage	Knackwurst-type sausage	Knackwurst-type sausage
Meat and meat products	Sausages	Preserved or partly preserved sausages	Pre-cooked sausages to be cooked before consumption	Thuringian sausage	Thuringian sausage	Thuringian sausage
Meat and meat products	Sausages	Preserved or partly preserved sausages	Pre-cooked sausages to be cooked before consumption	Pre-cooked sausages to be cooked before consumption	Pre-cooked sausages to be cooked before consumption	Pre-cooked sausages to be cooked before consumption
Meat and meat products	Sausages	Preserved or partly preserved sausages	Pre-cooked sausages to be cooked before consumption	Frankfurt-type sausage	Frankfurter sausage	Frankfurter sausage
Meat and meat products	Sausages	Preserved or partly preserved sausages	Pre-cooked sausages to be cooked before consumption	Frankfurt-type sausage	Wiener sausage	Wiener sausage
Meat and meat products	Sausages	Preserved or partly preserved sausages	Spreadable cooked sausages	Liver-type sausage	Liver-type sausage	Liver-type sausage
Meat and meat products	Sausages	Preserved or partly preserved sausages	Spreadable cooked sausages	Spreadable cooked sausages	Spreadable cooked sausages	Spreadable cooked sausages
Meat and meat products	Sausages	Preserved or partly preserved sausages	Cured unripened raw sausages	Mettwurst-type sausage	Mettwurst-type sausage	Mettwurst-type sausage
Meat and meat products	Sausages	Preserved or partly preserved sausages	Cured unripened raw sausages	Teewurst-type sausage	Teewurst-type sausage	Teewurst-type sausage
Meat and meat products	Sausages	Fresh raw sausages	Fresh bratwurst	Fresh bratwurst	Fresh bratwurst	Fresh bratwurst
Meat and meat products	Sausages	Fresh raw sausages	Fresh raw sausages	Fresh raw sausages	Fresh raw sausages	Fresh raw sausages
Meat and meat products	Mammals and birds meat	Mammals and birds meat	Mammals and birds meat	Mammals and birds meat	Mammals and birds meat	Mammals and birds meat
Meat and meat products	Mammals and birds meat	Mammals meat	Hare fresh meat	Hare fresh meat	Hare fresh meat	Hare fresh meat
Meat and meat products	Mammals and birds meat	Mammals meat	Rabbit fresh meat	Rabbit fresh meat	Rabbit fresh meat	Rabbit fresh meat
Meat and meat products	Mammals and birds meat	Mammals meat	Wild boar fresh meat	Wild boar fresh meat	Wild boar fresh meat	Wild boar fresh meat
Meat and meat products	Mammals and birds meat	Mammals meat	Deer fresh meat	Deer fresh meat	Deer fresh meat	Deer fresh meat
Meat and meat products	Mammals and birds meat	Mammals meat	Deer fresh meat	Roe deer meat	Roe deer meat	Roe deer meat
Meat and meat products	Mammals and birds meat	Mammals meat	Mammals meat	Mammals meat	Mammals meat	Mammals meat
Meat and meat products	Mammals and birds meat	Mammals meat	Pig fresh meat	Pig fresh meat	Pig fresh meat	Pig fresh meat
Meat and meat products	Mammals and birds meat	Mammals meat	Pig fresh meat	Pig minced meat	Pig minced meat	Pig minced meat
Meat and meat products	Mammals and birds meat	Mammals meat	Equine fresh meat	Equine fresh meat	Equine fresh meat	Equine fresh meat
Meat and meat products	Mammals and birds meat	Mammals meat	Bovine and pig fresh meat	Bovine and pig, minced meat	Bovine and pig, minced meat	Bovine and pig, minced meat
Meat and meat products	Mammals and birds meat	Mammals meat	Bovine fresh meat	Calf fresh meat	Calf fresh meat	Calf fresh meat
Meat and meat products	Mammals and birds meat	Mammals meat	Bovine fresh meat	Bovine, minced meat	Bovine, minced meat	Bovine, minced meat
Meat and meat products	Mammals and birds meat	Mammals meat	Bovine fresh meat	Cow, ox or bull fresh meat	Cow, ox or bull fresh meat	Cow, ox or bull fresh meat
Meat and meat products	Mammals and birds meat	Mammals meat	Sheep fresh meat	Lamb fresh meat	Lamb fresh meat	Lamb fresh meat
Meat and meat products	Mammals and birds meat	Birds meat	Poultry fresh meat (muscle meat)	Chicken fresh meat	Chicken fresh meat	Chicken fresh meat
Meat and meat products	Mammals and birds meat	Birds meat	Poultry fresh meat (muscle meat)	Duck fresh meat	Duck fresh meat	Duck fresh meat
Meat and meat products	Mammals and birds meat	Birds meat	Poultry fresh meat (muscle meat)	Goose fresh meat	Goose fresh meat	Goose fresh meat
Meat and meat products	Mammals and birds meat	Birds meat	Poultry fresh meat (muscle meat)	Pheasant fresh meat	Pheasant fresh meat	Pheasant fresh meat
Meat and meat products	Mammals and birds meat	Birds meat	Poultry fresh meat (muscle meat)	Pigeon fresh meat	Pigeon fresh meat	Pigeon fresh meat
Meat and meat products	Mammals and birds meat	Birds meat	Poultry fresh meat (muscle meat)	Quail fresh meat	Quail fresh meat	Quail fresh meat
Meat and meat products	Mammals and birds meat	Birds meat	Poultry fresh meat (muscle meat)	Ratites fresh meat	Ratites fresh meat	Ratites fresh meat
Meat and meat products	Mammals and birds meat	Birds meat	Poultry fresh meat (muscle meat)	Turkey fresh meat	Turkey fresh meat	Turkey fresh meat
Meat and meat products	Mammals and birds meat	Birds meat	Poultry fresh meat (muscle meat)	Poultry fresh meat (muscle meat)	Poultry fresh meat (muscle meat)	Poultry fresh meat (muscle meat)
Meat and meat products	Marinated meat	Marinated meat	Marinated meat	Marinated meat	Marinated meat	Marinated meat
Meat and meat products	Meat specialties	Meat specialties	Meat specialties	Meat specialties	Meat specialties	Meat specialties
Meat and meat products	Meat specialties	Liver based spreadable-textured specialities	Pate, pork liver	Pate, pork liver	Pate, pork liver	Pate, pork liver
Meat and meat products	Meat specialties	Liver based spreadable-textured specialities	Pate, chicken liver	Pate, chicken liver	Pate, chicken liver	Pate, chicken liver
Meat and meat products	Meat specialties	Liver based spreadable-textured specialities	Pate, goose liver	Pate, goose liver	Pate, goose liver	Pate, goose liver
Meat and meat products	Meat specialties	Liver based spreadable-textured specialities	Liver cheese	Liver cheese	Liver cheese	Liver cheese
Meat and meat products	Meat specialties	Liver based spreadable-textured specialities	Liver based spreadable-textured specialities	Liver based spreadable-textured specialities	Liver based spreadable-textured specialities	Liver based spreadable-textured specialities
Meat and meat products	Meat specialties	Meat based spreadable-textured specialities	Meat based spreadable-textured specialities	Meat based spreadable-textured specialities	Meat based spreadable-textured specialities	Meat based spreadable-textured specialities
Meat and meat products	Animal edible offal, non-muscle, other than liver and kidney	Animal edible offal, non-muscle, other than liver and kidney	Animal edible offal, non-muscle, other than liver and kidney	Animal edible offal, non-muscle, other than liver and kidney	Animal edible offal, non-muscle, other than liver and kidney	Animal edible offal, non-muscle, other than liver and kidney
Meat and meat products	Animal edible offal, non-muscle, other than liver and kidney	Mammals edible offal, non-muscle, other than liver and kidney	Bovine edible offal, non-muscle, other than liver and kidney	Bovine edible offal, non-muscle, other than liver and kidney	Bovine edible offal, non-muscle, other than liver and kidney	Bovine edible offal, non-muscle, other than liver and kidney
Meat and meat products	Animal edible offal, non-muscle, other than liver and kidney	Mammals edible offal, non-muscle, other than liver and kidney	Mammals edible offal, non-muscle, other than liver and kidney	Mammals edible offal, non-muscle, other than liver and kidney	Mammals edible offal, non-muscle, other than liver and kidney	Mammals edible offal, non-muscle, other than liver and kidney
Meat and meat products	Animal kidney	Animal kidney	Animal kidney	Animal kidney	Animal kidney	Animal kidney
Meat and meat products	Animal kidney	Mammals kidney	Sheep kidney	Sheep kidney	Sheep kidney	Sheep kidney
Meat and meat products	Animal kidney	Mammals kidney	Pig kidney	Pig kidney	Pig kidney	Pig kidney
Meat and meat products	Animal liver	Animal liver	Animal liver	Animal liver	Animal liver	Animal liver
Meat and meat products	Animal liver	Poultry liver	Chicken liver	Chicken liver	Chicken liver	Chicken liver
Meat and meat products	Animal liver	Poultry liver	Turkey liver	Turkey liver	Turkey liver	Turkey liver
Meat and meat products	Animal liver	Poultry liver	Poultry liver	Poultry liver	Poultry liver	Poultry liver
Meat and meat products	Animal liver	Mammals liver	Sheep liver	Sheep liver	Sheep liver	Sheep liver
Meat and meat products	Animal liver	Mammals liver	Bovine liver	Beef liver	Beef liver	Beef liver
Meat and meat products	Animal liver	Mammals liver	Bovine liver	Veal liver	Veal liver	Veal liver
Meat and meat products	Animal liver	Mammals liver	Pig liver	Pig liver	Pig liver	Pig liver
Meat and meat products	Animal liver	Mammals liver	Rabbit liver	Rabbit liver	Rabbit liver	Rabbit liver
Meat and meat products	Processed whole meat products	Raw cured (or seasoned) meat	Cured seasoned poultry meat	Cured seasoned poultry meat	Cured seasoned poultry meat	Cured seasoned poultry meat
Meat and meat products	Processed whole meat products	Raw cured (or seasoned) meat	Raw cured (or seasoned) meat	Raw cured (or seasoned) meat	Raw cured (or seasoned) meat	Raw cured (or seasoned) meat
Meat and meat products	Processed whole meat products	Raw cured (or seasoned) meat	Cured seasoned bovine meat	Ham, beef	Ham, beef	Ham, beef
Meat and meat products	Processed whole meat products	Raw cured (or seasoned) meat	Cured seasoned bovine meat	Corned beef, uncooked	Corned beef, uncooked	Corned beef, uncooked
Meat and meat products	Processed whole meat products	Raw cured (or seasoned) meat	Cured seasoned pork meat	Bacon	Bacon	Bacon
Meat and meat products	Processed whole meat products	Raw cured (or seasoned) meat	Cured seasoned pork meat	Ham, pork	Ham, pork	Ham, pork
Meat and meat products	Processed whole meat products	Processed whole meat products	Processed whole meat products	Processed whole meat products	Processed whole meat products	Processed whole meat products
Meat and meat products	Processed whole meat products	Cooked cured (or seasoned) meat	Cooked cured (or seasoned) pork meat	Corned pork meat, cooked	Corned pork meat, cooked	Corned pork meat, cooked
Meat and meat products	Canned-tinned meat	Canned meat	Canned meat	Canned meat	Canned meat	Canned meat
Meat and meat products	Animal meat dried	Mammals or birds dried meat	Bovine meat, dried	Bovine meat, dried	Bovine meat, dried	Bovine meat, dried
Meat and meat products	Animal other slaughtering products	Poultry other slaughtering products	Chicken, other slaughtering products	Chicken, other slaughtering products	Chicken, other slaughtering products	Chicken, other slaughtering products
Meat and meat products	Animal other slaughtering products	Poultry other slaughtering products	Poultry other slaughtering products	Poultry other slaughtering products	Poultry other slaughtering products	Poultry other slaughtering products
Meat and meat products	Animal other slaughtering products	Mammals other slaughtering products	Bovine other slaughtering products	Bovine tail	Bovine tail	Bovine tail
Meat and meat products	Animal other slaughtering products	Mammals other slaughtering products	Bovine other slaughtering products	Bovine tongue	Bovine tongue	Bovine tongue
Meat and meat products	Animal other slaughtering products	Mammals other slaughtering products	Pig other slaughtering products	Pig tongue	Pig tongue	Pig tongue
Meat and meat products	Animal other slaughtering products	Mammals other slaughtering products	Sheep other slaughtering products	Sheep other slaughtering products	Sheep other slaughtering products	Sheep other slaughtering products
Meat and meat products	Animal other slaughtering products	Mammals other slaughtering products	Mammals other slaughtering products	Mammals other slaughtering products	Mammals other slaughtering products	Mammals other slaughtering products
Seasoning, sauces and condiments	Dessert sauces/toppings	Fruit sauce	Fruit sauce	Fruit sauce	Fruit sauce	Fruit sauce
Seasoning, sauces and condiments	Dessert sauces/toppings	Chocolate sauce	Chocolate sauce	Chocolate sauce	Chocolate sauce	Chocolate sauce
Seasoning, sauces and condiments	Dessert sauces/toppings	Alcoholic sweet sauce	Alcoholic sweet sauce	Alcoholic sweet sauce	Alcoholic sweet sauce	Alcoholic sweet sauce
Seasoning, sauces and condiments	Dessert sauces/toppings	Dessert sauces/toppings	Dessert sauces/toppings	Dessert sauces/toppings	Dessert sauces/toppings	Dessert sauces/toppings
Seasoning, sauces and condiments	Condiments (including table-top formats)	Savoury sauces	Savoury sauces	Savoury sauces	Savoury sauces	Savoury sauces
Seasoning, sauces and condiments	Condiments (including table-top formats)	Savoury sauces	Barbecue or steak sauces	Barbecue or steak sauces	Barbecue or steak sauces	Barbecue or steak sauces
Seasoning, sauces and condiments	Condiments (including table-top formats)	Savoury sauces	Continental european brown cooked sauce, gravy	Continental european brown cooked sauce, gravy	Continental european brown cooked sauce, gravy	Continental european brown cooked sauce, gravy
Seasoning, sauces and condiments	Condiments (including table-top formats)	Savoury sauces	Herbs/spices sauces	Curry sauce	Curry sauce	Curry sauce
Seasoning, sauces and condiments	Condiments (including table-top formats)	Savoury sauces	Herbs/spices sauces	Horseradish sauce	Horseradish sauce	Horseradish sauce
Seasoning, sauces and condiments	Condiments (including table-top formats)	Savoury sauces	Herbs/spices sauces	Salsa	Salsa	Salsa
Seasoning, sauces and condiments	Condiments (including table-top formats)	Savoury sauces	Herbs/spices sauces	Tabasco sauce	Tabasco sauce	Tabasco sauce
Seasoning, sauces and condiments	Condiments (including table-top formats)	Savoury sauces	Herbs/spices sauces	Aioli or garlic sauce	Aioli or garlic sauce	Aioli or garlic sauce
Seasoning, sauces and condiments	Condiments (including table-top formats)	Savoury sauces	Herbs/spices sauces	Herbs, vegetables and oil sauces	Herbs, vegetables and oil sauces	Herbs, vegetables and oil sauces
Seasoning, sauces and condiments	Condiments (including table-top formats)	Savoury sauces	Herbs/spices sauces	Herbs/spices sauces	Herbs/spices sauces	Herbs/spices sauces
Seasoning, sauces and condiments	Condiments (including table-top formats)	Savoury sauces	Herbs/spices sauces	Pesto	Pesto	Pesto
Seasoning, sauces and condiments	Condiments (including table-top formats)	Savoury sauces	Herbs/spices sauces	Tzatziki	Tzatziki	Tzatziki
Seasoning, sauces and condiments	Condiments (including table-top formats)	Savoury sauces	Mustard and related sauces	Mustard, mild	Mustard, mild	Mustard, mild
Seasoning, sauces and condiments	Condiments (including table-top formats)	Savoury sauces	Mustard and related sauces	Mustard, hot	Mustard, hot	Mustard, hot
Seasoning, sauces and condiments	Condiments (including table-top formats)	Savoury sauces	Mustard and related sauces	Mustard, sweet	Mustard, sweet	Mustard, sweet
Seasoning, sauces and condiments	Condiments (including table-top formats)	Savoury sauces	Mustard and related sauces	Mustard and related sauces	Mustard and related sauces	Mustard and related sauces
Seasoning, sauces and condiments	Condiments (including table-top formats)	Savoury sauces	Sauces from fermented/hydrolised sources and similar	Soy sauce	Soy sauce	Soy sauce
Seasoning, sauces and condiments	Condiments (including table-top formats)	Savoury sauces	Sauces from fermented/hydrolised sources and similar	Sauces from fermented/hydrolised sources and similar	Sauces from fermented/hydrolised sources and similar	Sauces from fermented/hydrolised sources and similar
Seasoning, sauces and condiments	Condiments (including table-top formats)	Savoury sauces	Tomato ketchup and related sauces	Tomato ketchup and related sauces	Tomato ketchup and related sauces	Tomato ketchup and related sauces
Seasoning, sauces and condiments	Condiments (including table-top formats)	Savoury sauces	Tomato-containing cooked sauces	Tomato-containing cooked sauces	Tomato-containing cooked sauces	Tomato-containing cooked sauces
Seasoning, sauces and condiments	Condiments (including table-top formats)	Savoury sauces	White sauces	Cream sauce	Cream sauce	Cream sauce
Seasoning, sauces and condiments	Condiments (including table-top formats)	Savoury sauces	White sauces	Cheese sauce	Cheese sauce	Cheese sauce
Seasoning, sauces and condiments	Condiments (including table-top formats)	Savoury sauces	White sauces	Butter sauce	Butter sauce	Butter sauce
Seasoning, sauces and condiments	Condiments (including table-top formats)	Savoury sauces	White sauces	Bechamel sauce	Bechamel sauce	Bechamel sauce
Seasoning, sauces and condiments	Condiments (including table-top formats)	Savoury sauces	White sauces	White sauces	White sauces	White sauces
Seasoning, sauces and condiments	Condiments (including table-top formats)	Savoury sauces	Mayonnaise, hollandaise and related sauces	Hollandaise type sauce	Hollandaise type sauce	Hollandaise type sauce
Seasoning, sauces and condiments	Condiments (including table-top formats)	Savoury sauces	Mayonnaise, hollandaise and related sauces	Mayonnaise sauce	Mayonnaise sauce	Mayonnaise sauce
Seasoning, sauces and condiments	Condiments (including table-top formats)	Savoury sauces	Mayonnaise, hollandaise and related sauces	Mayonnaise sauce	Mayonnaise, low fat	Mayonnaise, low fat
Seasoning, sauces and condiments	Condiments (including table-top formats)	Savoury sauces	Mayonnaise, hollandaise and related sauces	Mayonnaise, hollandaise and related sauces	Mayonnaise, hollandaise and related sauces	Mayonnaise, hollandaise and related sauces
Seasoning, sauces and condiments	Condiments (including table-top formats)	Savoury sauces	Vegetables-based cooked sauce	Mushrooms cooked sauce	Mushrooms cooked sauce	Mushrooms cooked sauce
Seasoning, sauces and condiments	Condiments (including table-top formats)	Salad dressing	Salad dressing	Salad dressing	Salad dressing	Salad dressing
Seasoning, sauces and condiments	Condiments (including table-top formats)	Condiments (including table-top formats)	Condiments (including table-top formats)	Condiments (including table-top formats)	Condiments (including table-top formats)	Condiments (including table-top formats)
Seasoning, sauces and condiments	Condiments (including table-top formats)	Vinegar	Vinegar, wine	Vinegar, wine	Vinegar, wine	Vinegar, wine
Seasoning, sauces and condiments	Savoury extracts and sauce ingredients	Stock cubes or granulate (bouillon base)	Stock cubes or granulate (bouillon base)	Stock cubes or granulate (bouillon base)	Stock cubes or granulate (bouillon base)	Stock cubes or granulate (bouillon base)
Seasoning, sauces and condiments	Savoury extracts and sauce ingredients	Gravy ingredients	Gravy thickener	Gravy thickener	Gravy thickener	Gravy thickener
Seasoning, sauces and condiments	Savoury extracts and sauce ingredients	Taste enhancing RPC extracts	Miscellaneous savoury extracts	Miscellaneous savoury extracts	Miscellaneous savoury extracts	Miscellaneous savoury extracts
Seasoning, sauces and condiments	Savoury extracts and sauce ingredients	Taste enhancing RPC extracts	Miscellaneous savoury extracts	Vegetable savoury extracts	Vegetable savoury extracts	Vegetable savoury extracts
Seasoning, sauces and condiments	Seasonings and extracts	Seasonings	Salt	Salt	Salt	Salt
Seasoning, sauces and condiments	Seasonings and extracts	Seasonings	Salt	Salt, iodised	Salt, iodised	Salt, iodised
Seasoning, sauces and condiments	Seasonings and extracts	Seasonings	Salt	Salt, iodised and fluoridated	Salt, iodised and fluoridated	Salt, iodised and fluoridated
Seasoning, sauces and condiments	Seasonings and extracts	Seasonings	Salt	Salt, flavoured	Salt, flavoured	Salt, flavoured
Seasoning, sauces and condiments	Seasonings and extracts	Seasonings	Seasoning mixes	Seasoning mixes	Seasoning mixes	Seasoning mixes
Starchy roots or tubers and products thereof, sugar plants	Starchy roots and tubers	Tropical root and tuber vegetables	Tropical root and tuber vegetables	Tropical root and tuber vegetables	Tropical root and tuber vegetables	Tropical root and tuber vegetables
Starchy roots or tubers and products thereof, sugar plants	Starchy roots and tubers	Tropical root and tuber vegetables	Sweet potatoes and similar-	Sweet potatoes	Sweet potatoes	Sweet potatoes
Starchy roots or tubers and products thereof, sugar plants	Starchy roots and tubers	Potatoes and similar-	Potatoes	Potato boiled	Potato boiled	Potato boiled
Starchy roots or tubers and products thereof, sugar plants	Starchy roots and tubers	Potatoes and similar-	Potatoes	Potato baked	Potato baked	Potato baked
Starchy roots or tubers and products thereof, sugar plants	Starchy roots and tubers	Potatoes and similar-	Potatoes	Potatoes	Potatoes	Potatoes
Starchy roots or tubers and products thereof, sugar plants	Starchy root and tuber products	Canned starchy root products	Canned starchy root products	Canned starchy root products	Canned starchy root products	Canned starchy root products
Starchy roots or tubers and products thereof, sugar plants	Starchy root and tuber products	Dried starchy roots and tuber products	Dried potato products	Mashed potato powder	Mashed potato powder	Mashed potato powder
Starchy roots or tubers and products thereof, sugar plants	Starchy root and tuber products	Dried starchy roots and tuber products	Dried potato products	Potato flour	Potato flour	Potato flour
Sugar and similar, confectionery and water-based sweet desserts	Confectionery including chocolate	Candies (soft and hard)	Candies (soft and hard)	Candies (soft and hard)	Candies (soft and hard)	Candies (soft and hard)
Sugar and similar, confectionery and water-based sweet desserts	Confectionery including chocolate	Candies (soft and hard)	Hard candies	Hard candies	Hard candies	Hard candies
Sugar and similar, confectionery and water-based sweet desserts	Confectionery including chocolate	Candies (soft and hard)	Soft candies and analogues	Liquorice candies	Liquorice candies	Liquorice candies
Sugar and similar, confectionery and water-based sweet desserts	Confectionery including chocolate	Candies (soft and hard)	Soft candies and analogues	Jelly candies	Jelly candies	Jelly candies
Sugar and similar, confectionery and water-based sweet desserts	Confectionery including chocolate	Candies (soft and hard)	Soft candies and analogues	Foamed sugar products (marshmallows)	Foamed sugar products (marshmallows)	Foamed sugar products (marshmallows)
Sugar and similar, confectionery and water-based sweet desserts	Confectionery including chocolate	Candies (soft and hard)	Soft candies and analogues	Chewing gum	Chewing gum	Chewing gum
Sugar and similar, confectionery and water-based sweet desserts	Confectionery including chocolate	Confectionery including chocolate	Confectionery including chocolate	Confectionery including chocolate	Confectionery including chocolate	Confectionery including chocolate
Sugar and similar, confectionery and water-based sweet desserts	Confectionery including chocolate	Chocolate and chocolate products	Chocolate and similar	Milk chocolate	Milk chocolate	Milk chocolate
Sugar and similar, confectionery and water-based sweet desserts	Confectionery including chocolate	Chocolate and chocolate products	Chocolate and similar	Bitter chocolate	Bitter chocolate	Bitter chocolate
Sugar and similar, confectionery and water-based sweet desserts	Confectionery including chocolate	Chocolate and chocolate products	Chocolate and similar	Bitter chocolate	Bitter-sweet chocolate	Bitter-sweet chocolate
Sugar and similar, confectionery and water-based sweet desserts	Confectionery including chocolate	Chocolate and chocolate products	Chocolate and similar	Chocolate and similar	Chocolate and similar	Chocolate and similar
Sugar and similar, confectionery and water-based sweet desserts	Confectionery including chocolate	Chocolate and chocolate products	Chocolate and similar	White chocolate	White chocolate	White chocolate
Sugar and similar, confectionery and water-based sweet desserts	Confectionery including chocolate	Chocolate and chocolate products	Chocolate/cocoa-based products	Chocolate coated confectionery	Chocolate coated confectionery	Chocolate coated confectionery
Sugar and similar, confectionery and water-based sweet desserts	Confectionery including chocolate	Chocolate and chocolate products	Chocolate/cocoa-based products	Filled chocolate	Filled chocolate	Filled chocolate
Sugar and similar, confectionery and water-based sweet desserts	Confectionery including chocolate	Chocolate and chocolate products	Chocolate/cocoa-based products	Chocolate spread	Chocolate spread	Chocolate spread
Sugar and similar, confectionery and water-based sweet desserts	Confectionery including chocolate	Chocolate and chocolate products	Chocolate/cocoa-based products	Chocolate/cocoa-based products	Chocolate/cocoa-based products	Chocolate/cocoa-based products
Sugar and similar, confectionery and water-based sweet desserts	Confectionery including chocolate	Sweet bars and other formed sweet masses	Nougat	Nougat	Nougat	Nougat
Sugar and similar, confectionery and water-based sweet desserts	Confectionery including chocolate	Sweet bars and other formed sweet masses	Marzipan	Marzipan	Marzipan	Marzipan
Sugar and similar, confectionery and water-based sweet desserts	Confectionery including chocolate	Sweet bars and other formed sweet masses	Sugar cotton	Sugar cotton	Sugar cotton	Sugar cotton
Sugar and similar, confectionery and water-based sweet desserts	Table-top sweeteners formulations	Table-top sweeteners in liquid form	Table-top sweeteners in liquid form	Table-top sweeteners in liquid form	Table-top sweeteners in liquid form	Table-top sweeteners in liquid form
Sugar and similar, confectionery and water-based sweet desserts	Table-top sweeteners formulations	Table-top sweeteners in powder form	Table-top sweeteners in powder form	Table-top sweeteners in powder form	Table-top sweeteners in powder form	Table-top sweeteners in powder form
Sugar and similar, confectionery and water-based sweet desserts	Table-top sweeteners formulations	Table-top sweeteners in tablets	Table-top sweeteners in tablets	Table-top sweeteners in tablets	Table-top sweeteners in tablets	Table-top sweeteners in tablets
Sugar and similar, confectionery and water-based sweet desserts	Table-top sweeteners formulations	Table-top sweeteners formulations	Table-top sweeteners formulations	Table-top sweeteners formulations	Table-top sweeteners formulations	Table-top sweeteners formulations
Sugar and similar, confectionery and water-based sweet desserts	Water-based sweet desserts	Water-based desserts spoonable	Gelatine dessert	Gelatine dessert	Gelatine dessert	Gelatine dessert
Sugar and similar, confectionery and water-based sweet desserts	Water-based sweet desserts	Water-based ice creams	Sorbet	Sorbet	Sorbet	Sorbet
Sugar and similar, confectionery and water-based sweet desserts	Sugar and other sweetening ingredients (excluding intensive swe	Honey	Honey	Honey	Honey	Honey
Sugar and similar, confectionery and water-based sweet desserts	Sugar and other sweetening ingredients (excluding intensive swe	Sugars (mono- and di-saccharides)	Sugars (mono- and di-saccharides)	Sugars (mono- and di-saccharides)	Sugars (mono- and di-saccharides)	Sugars (mono- and di-saccharides)
Sugar and similar, confectionery and water-based sweet desserts	Sugar and other sweetening ingredients (excluding intensive swe	Sugars (mono- and di-saccharides)	Mono- di-saccharides other than sucrose	Fructose	Fructose	Fructose
Sugar and similar, confectionery and water-based sweet desserts	Sugar and other sweetening ingredients (excluding intensive swe	Sugars (mono- and di-saccharides)	Mono- di-saccharides other than sucrose	Lactose	Lactose	Lactose
Sugar and similar, confectionery and water-based sweet desserts	Sugar and other sweetening ingredients (excluding intensive swe	Sugars (mono- and di-saccharides)	Mono- di-saccharides other than sucrose	Glucose	Glucose	Glucose
Sugar and similar, confectionery and water-based sweet desserts	Sugar and other sweetening ingredients (excluding intensive swe	Sugars (mono- and di-saccharides)	Sucrose (common sugar)	Flavoured sugar	Flavoured sugar	Flavoured sugar
Sugar and similar, confectionery and water-based sweet desserts	Sugar and other sweetening ingredients (excluding intensive swe	Sugars (mono- and di-saccharides)	Sucrose (common sugar)	White sugar	White sugar	White sugar
Sugar and similar, confectionery and water-based sweet desserts	Sugar and other sweetening ingredients (excluding intensive swe	Sugars (mono- and di-saccharides)	Sucrose (common sugar)	White sugar	Refined beet sugar	Refined beet sugar
Sugar and similar, confectionery and water-based sweet desserts	Sugar and other sweetening ingredients (excluding intensive swe	Sugars (mono- and di-saccharides)	Sucrose (common sugar)	Brown sugar	Brown sugar	Brown sugar
Sugar and similar, confectionery and water-based sweet desserts	Sugar and other sweetening ingredients (excluding intensive swe	Sugars (mono- and di-saccharides)	Sucrose (common sugar)	Brown sugar	Brown beet sugar	Brown beet sugar
Sugar and similar, confectionery and water-based sweet desserts	Sugar and other sweetening ingredients (excluding intensive swe	Sugars (mono- and di-saccharides)	Sucrose (common sugar)	Sugar, icing - powder	Sugar, icing - powder	Sugar, icing - powder
Sugar and similar, confectionery and water-based sweet desserts	Sugar and other sweetening ingredients (excluding intensive swe	Syrups (molasses and other syrups)	Syrups	Sugar beet syrup	Sugar beet syrup	Sugar beet syrup
Sugar and similar, confectionery and water-based sweet desserts	Sugar and other sweetening ingredients (excluding intensive swe	Syrups (molasses and other syrups)	Syrups	Syrups	Syrups	Syrups
Vegetables and vegetable products	Bulb vegetables	Garlic and similar-	Garlic	Garlic	Garlic	Garlic
Vegetables and vegetable products	Bulb vegetables	Onions and similar-	Onions	Onions	Onions	Onions
Vegetables and vegetable products	Bulb vegetables	Onions and similar-	Pearl onion	Pearl onion	Pearl onion	Pearl onion
Vegetables and vegetable products	Bulb vegetables	Spring onions and similar-	Spring onions	Spring onions	Spring onions	Spring onions
Vegetables and vegetable products	Bulb vegetables	Shallots and similar-	Shallots	Shallots	Shallots	Shallots
Vegetables and vegetable products	Fruiting vegetables	Fruiting vegetables	Fruiting vegetables	Fruiting vegetables	Fruiting vegetables	Fruiting vegetables
Vegetables and vegetable products	Fruiting vegetables	Cucurbits fruiting vegetables	Cucurbits with edible peel	Courgettes and similar-	Courgettes	Courgettes
Vegetables and vegetable products	Fruiting vegetables	Cucurbits fruiting vegetables	Cucurbits with edible peel	Cucumbers and similar-	Cucumbers	Cucumbers
Vegetables and vegetable products	Fruiting vegetables	Cucurbits fruiting vegetables	Cucurbits with inedible peel	Melons and similar-	Melons	Melons
Vegetables and vegetable products	Fruiting vegetables	Cucurbits fruiting vegetables	Cucurbits with inedible peel	Pumpkins and similar-	Pumpkins	Pumpkins
Vegetables and vegetable products	Fruiting vegetables	Cucurbits fruiting vegetables	Cucurbits with inedible peel	Watermelons and similar-	Watermelons	Watermelons
Vegetables and vegetable products	Fruiting vegetables	Solanacea	Aubergines and similar-	Aubergines	Aubergines	Aubergines
Vegetables and vegetable products	Fruiting vegetables	Solanacea	Peppers and similar-	Chili peppers	Chili peppers	Chili peppers
Vegetables and vegetable products	Fruiting vegetables	Solanacea	Peppers and similar-	Sweet peppers	Sweet peppers	Sweet peppers
Vegetables and vegetable products	Fruiting vegetables	Solanacea	Tomatoes and similar-	Ground cherries (physalis etc.)	Cape gooseberries	Cape gooseberries
Vegetables and vegetable products	Fruiting vegetables	Solanacea	Tomatoes and similar-	Tomatoes	Tomatoes	Tomatoes
Vegetables and vegetable products	Fruiting vegetables	Solanacea	Tomatoes and similar-	Tomatoes	Beefsteak tomato	Beefsteak tomato
Vegetables and vegetable products	Fruiting vegetables	Solanacea	Tomatoes and similar-	Tomatoes	Cherry tomatoes	Cherry tomatoes
Vegetables and vegetable products	Fruiting vegetables	Solanacea	Tomatoes and similar-	Tomatoes	Globe tomato	Globe tomato
Vegetables and vegetable products	Fruiting vegetables	Sweet corn and similar-	Sweet corn	Sweet corn	Sweet corn	Sweet corn
Vegetables and vegetable products	Leafy vegetables	Leafy vegetables	Leafy vegetables	Leafy vegetables	Leafy vegetables	Leafy vegetables
Vegetables and vegetable products	Leafy vegetables	Head brassica	Brussels sprouts and similar-	Brussels sprouts	Brussels sprouts	Brussels sprouts
Vegetables and vegetable products	Leafy vegetables	Head brassica	Head cabbages and similar-	Red cabbages	Red cabbages	Red cabbages
Vegetables and vegetable products	Leafy vegetables	Head brassica	Head cabbages and similar-	Savoy cabbages	Savoy cabbages	Savoy cabbages
Vegetables and vegetable products	Leafy vegetables	Head brassica	Head cabbages and similar-	White cabbage	White cabbage	White cabbage
Vegetables and vegetable products	Leafy vegetables	Leafy brassica	Kales and similar-	Curly kales	Curly kales	Curly kales
Vegetables and vegetable products	Leafy vegetables	Leafy brassica	Chinese cabbages and similar-	Chinese cabbages	Chinese cabbages	Chinese cabbages
Vegetables and vegetable products	Leafy vegetables	Lettuces and salad plants	Escaroles and similar-	Escaroles and similar-	Escaroles and similar-	Escaroles and similar-
Vegetables and vegetable products	Leafy vegetables	Lettuces and salad plants	Escaroles and similar-	Curly endives	Curly endives	Curly endives
Vegetables and vegetable products	Leafy vegetables	Lettuces and salad plants	Escaroles and similar-	Radicchio	Radicchio	Radicchio
Vegetables and vegetable products	Leafy vegetables	Lettuces and salad plants	Lamb's lettuces and similar-	Lamb's lettuces	Lamb's lettuces	Lamb's lettuces
Vegetables and vegetable products	Leafy vegetables	Lettuces and salad plants	Lettuces and similar-	Crisp lettuces	Crisp lettuces	Crisp lettuces
Vegetables and vegetable products	Leafy vegetables	Lettuces and salad plants	Lettuces and similar-	Head lettuces	Head lettuces	Head lettuces
Vegetables and vegetable products	Leafy vegetables	Lettuces and salad plants	Lettuces and similar-	Cutting lettuces	Cutting lettuces	Cutting lettuces
Vegetables and vegetable products	Leafy vegetables	Lettuces and salad plants	Lettuces and similar-	Romaines	Romaines	Romaines
Vegetables and vegetable products	Leafy vegetables	Spinach-type leaves	Spinaches and similar-	Spinaches	Spinaches	Spinaches
Vegetables and vegetable products	Leafy vegetables	Spinach-type leaves	Chards and similar-	Swiss chards	Swiss chards	Swiss chards
Vegetables and vegetable products	Leafy vegetables	Other leafy vegetables	Grape leaves and similar species	Grape leaves	Grape leaves	Grape leaves
Vegetables and vegetable products	Leafy vegetables	Other leafy vegetables	Witloofs and similar-	Witloofs	Witloofs	Witloofs
Vegetables and vegetable products	Leafy vegetables	Other leafy vegetables	Witloofs and similar-	Dandelion leaves (forced)	Dandelion leaves (forced)	Dandelion leaves (forced)
Vegetables and vegetable products	Root and tuber vegetables (excluding starchy- and sugar-)	Root and tuber vegetables (excluding starchy- and sugar-)	Root and tuber vegetables (excluding starchy- and sugar-)	Root and tuber vegetables (excluding starchy- and sugar-)	Root and tuber vegetables (excluding starchy- and sugar-)	Root and tuber vegetables (excluding starchy- and sugar-)
Vegetables and vegetable products	Root and tuber vegetables (excluding starchy- and sugar-)	Beetroots and similar-	Beetroots	Beetroots	Beetroots	Beetroots
Vegetables and vegetable products	Root and tuber vegetables (excluding starchy- and sugar-)	Carrots and similar-	Carrots	Carrots	Carrots	Carrots
Vegetables and vegetable products	Root and tuber vegetables (excluding starchy- and sugar-)	Celeriacs and similar-	Celeriacs	Celeriacs	Celeriacs	Celeriacs
Vegetables and vegetable products	Root and tuber vegetables (excluding starchy- and sugar-)	Radishes and similar-	Black radishes	Black radishes	Black radishes	Black radishes
Vegetables and vegetable products	Root and tuber vegetables (excluding starchy- and sugar-)	Radishes and similar-	Small radishes	Small radishes	Small radishes	Small radishes
Vegetables and vegetable products	Root and tuber vegetables (excluding starchy- and sugar-)	Salsifies and similar-	Scorzonera	Scorzonera	Scorzonera	Scorzonera
Vegetables and vegetable products	Root and tuber vegetables (excluding starchy- and sugar-)	Swedes and similar-	Swedes	Swedes	Swedes	Swedes
Vegetables and vegetable products	Root and tuber vegetables (excluding starchy- and sugar-)	Horseradishes and similar-	Horseradish roots	Horseradish roots	Horseradish roots	Horseradish roots
Vegetables and vegetable products	Root and tuber vegetables (excluding starchy- and sugar-)	Parsnips and similar-	Parsnip roots	Parsnip roots	Parsnip roots	Parsnip roots
Vegetables and vegetable products	Root and tuber vegetables (excluding starchy- and sugar-)	Turnips and similar-	Turnips	Turnips	Turnips	Turnips
Vegetables and vegetable products	Algae and prokaryotes organisms	Algae and prokaryotes organisms	Algae and prokaryotes organisms	Algae and prokaryotes organisms	Algae and prokaryotes organisms	Algae and prokaryotes organisms
Vegetables and vegetable products	Legumes with pod	Beans (with pods) and similar-	Broad beans (with pods)	Broad beans (with pods)	Broad beans (with pods)	Broad beans (with pods)
Vegetables and vegetable products	Legumes with pod	Beans (with pods) and similar-	Slicing bean (young pods)	French beans (with pods)	French beans (with pods)	French beans (with pods)
Vegetables and vegetable products	Legumes with pod	Peas (with pods) and similar-	Garden peas (with pods)	Garden peas (with pods)	Garden peas (with pods)	Garden peas (with pods)
Vegetables and vegetable products	Legumes with pod	Legumes with pod	Legumes with pod	Legumes with pod	Legumes with pod	Legumes with pod
Vegetables and vegetable products	Sprouts, shoots and similar	Alfalfa sprouts	Alfalfa sprouts	Alfalfa sprouts	Alfalfa sprouts	Alfalfa sprouts
Vegetables and vegetable products	Sprouts, shoots and similar	Cresses	Cresses	Cresses	Cresses	Cresses
Vegetables and vegetable products	Sprouts, shoots and similar	Mung bean sprouts	Mung bean sprouts	Mung bean sprouts	Mung bean sprouts	Mung bean sprouts
Vegetables and vegetable products	Sprouts, shoots and similar	Soyabeans sprouts	Soyabeans sprouts	Soyabeans sprouts	Soyabeans sprouts	Soyabeans sprouts
Vegetables and vegetable products	Sprouts, shoots and similar	Sprouts, shoots and similar	Sprouts, shoots and similar	Sprouts, shoots and similar	Sprouts, shoots and similar	Sprouts, shoots and similar
Vegetables and vegetable products	Stems/stalks eaten as vegetables	Stems/stalks eaten as vegetables	Stems/stalks eaten as vegetables	Stems/stalks eaten as vegetables	Stems/stalks eaten as vegetables	Stems/stalks eaten as vegetables
Vegetables and vegetable products	Stems/stalks eaten as vegetables	Asparagus and similar-	Asparagus	Asparagus	Asparagus	Asparagus
Vegetables and vegetable products	Stems/stalks eaten as vegetables	Bamboo shoots and similar-	Bamboo shoots	Bamboo shoots	Bamboo shoots	Bamboo shoots
Vegetables and vegetable products	Stems/stalks eaten as vegetables	Celeries and similar-	Celeries	Celeries	Celeries	Celeries
Vegetables and vegetable products	Stems/stalks eaten as vegetables	Florence fennels and similar-	Florence fennels	Florence fennels	Florence fennels	Florence fennels
Vegetables and vegetable products	Stems/stalks eaten as vegetables	Globe artichokes and similar-	Globe artichokes	Globe artichokes	Globe artichokes	Globe artichokes
Vegetables and vegetable products	Stems/stalks eaten as vegetables	Kohlrabies and similar-	Kohlrabies	Kohlrabies	Kohlrabies	Kohlrabies
Vegetables and vegetable products	Stems/stalks eaten as vegetables	Leeks and similar-	Leeks	Leeks	Leeks	Leeks
Vegetables and vegetable products	Stems/stalks eaten as vegetables	Rhubarbs and similar-	Rhubarbs	Rhubarbs	Rhubarbs	Rhubarbs
Vegetables and vegetable products	Flowering brassica	Broccoli and similar-	Broccoli	Broccoli	Broccoli	Broccoli
Vegetables and vegetable products	Flowering brassica	Cauliflowers and similar-	Cauliflowers	Cauliflowers	Cauliflowers	Cauliflowers
Vegetables and vegetable products	Fungi, mosses and lichens	Fungi	Cultivated fungi and similar-	Common mushrooms	Common mushrooms	Common mushrooms
Vegetables and vegetable products	Fungi, mosses and lichens	Fungi	Cultivated fungi and similar-	Shiitake	Shiitake	Shiitake
Vegetables and vegetable products	Fungi, mosses and lichens	Fungi	Cultivated fungi and similar-	Cultivated fungi and similar-	Cultivated fungi and similar-	Cultivated fungi and similar-
Vegetables and vegetable products	Fungi, mosses and lichens	Fungi	Cultivated fungi and similar-	Pleurotus	Pearl oyster mushrooms	Pearl oyster mushrooms
Vegetables and vegetable products	Fungi, mosses and lichens	Fungi	Wild fungi and similar-	Ceps	Ceps	Ceps
Vegetables and vegetable products	Fungi, mosses and lichens	Fungi	Wild fungi and similar-	Chanterelles	Chanterelles	Chanterelles
Vegetables and vegetable products	Fungi, mosses and lichens	Fungi	Wild fungi and similar-	Honey mushroom	Honey mushroom	Honey mushroom
Vegetables and vegetable products	Fungi, mosses and lichens	Fungi	Wild fungi and similar-	Morels	Morels	Morels
Vegetables and vegetable products	Fungi, mosses and lichens	Fungi	Wild fungi and similar-	Truffles	Truffles	Truffles
Vegetables and vegetable products	Herbs and edible flowers	Aromatic herbs	Aromatic herbs	Aromatic herbs	Aromatic herbs	Aromatic herbs
Vegetables and vegetable products	Herbs and edible flowers	Aromatic herbs	Basils and mints	Basil	Basil	Basil
Vegetables and vegetable products	Herbs and edible flowers	Aromatic herbs	Basils and mints	Mints	Peppermint	Peppermint
Vegetables and vegetable products	Herbs and edible flowers	Aromatic herbs	Basils and mints	Lemon balm	Lemon balm	Lemon balm
Vegetables and vegetable products	Herbs and edible flowers	Aromatic herbs	Chives and similar-	Chives	Chives	Chives
Vegetables and vegetable products	Herbs and edible flowers	Aromatic herbs	Parsley and similar-	Parsley	Parsley	Parsley
Vegetables and vegetable products	Herbs and edible flowers	Aromatic herbs	Sage and similar-	Sage	Sage	Sage
Vegetables and vegetable products	Herbs and edible flowers	Aromatic herbs	Sage and similar-	Borage	Borage	Borage
Vegetables and vegetable products	Herbs and edible flowers	Aromatic herbs	Celery leaves and similar-	Lovage leaves	Lovage leaves	Lovage leaves
Vegetables and vegetable products	Herbs and edible flowers	Aromatic herbs	Celery leaves and similar-	Dill leaves	Dill leaves	Dill leaves
Vegetables and vegetable products	Herbs and edible flowers	Aromatic herbs	Celery leaves and similar-	Sorrel	Garden sorrel	Garden sorrel
Vegetables and vegetable products	Herbs and edible flowers	Aromatic herbs	Celery leaves and similar-	Sorrel	Sorrel	Sorrel
Vegetables and vegetable products	Herbs and edible flowers	Aromatic herbs	Chervil and similar-	Chervil	Chervil	Chervil
Vegetables and vegetable products	Herbs and edible flowers	Aromatic herbs	Rosemary and similar-	Rosemary	Rosemary	Rosemary
Vegetables and vegetable products	Herbs and edible flowers	Aromatic herbs	Tarragon and similar-	Common nettle	Common nettle	Common nettle
Vegetables and vegetable products	Herbs and edible flowers	Aromatic herbs	Thyme and similar-	Oregano	Oregano	Oregano
Vegetables and vegetable products	Herbs and edible flowers	Aromatic herbs	Thyme and similar-	Thyme	Thyme	Thyme
Vegetables and vegetable products	Processed or preserved vegetables and similar	Canned/jarred vegetables	French beans canned	French beans canned	French beans canned	French beans canned
Vegetables and vegetable products	Processed or preserved vegetables and similar	Canned/jarred vegetables	Sweet corn canned	Sweet corn canned	Sweet corn canned	Sweet corn canned
Vegetables and vegetable products	Processed or preserved vegetables and similar	Canned/jarred vegetables	Canned mushrooms	Canned mushrooms	Canned mushrooms	Canned mushrooms
Vegetables and vegetable products	Processed or preserved vegetables and similar	Canned/jarred vegetables	Canned/jarred vegetables	Canned/jarred vegetables	Canned/jarred vegetables	Canned/jarred vegetables
Vegetables and vegetable products	Processed or preserved vegetables and similar	Dried vegetables	Dried mushrooms	Dried mushrooms	Dried mushrooms	Dried mushrooms
Vegetables and vegetable products	Processed or preserved vegetables and similar	Dried vegetables	Dried vegetables	Dried vegetables	Dried vegetables	Dried vegetables
Vegetables and vegetable products	Processed or preserved vegetables and similar	Salted vegetables	Salted vegetables	Salted vegetables	Salted vegetables	Salted vegetables
Vegetables and vegetable products	Processed or preserved vegetables and similar	Fermented or pickled vegetables	Fermented vegetables	Sauerkraut	Sauerkraut	Sauerkraut
Vegetables and vegetable products	Processed or preserved vegetables and similar	Fermented or pickled vegetables	Fermented vegetables	Fermented vegetables	Fermented vegetables	Fermented vegetables
Vegetables and vegetable products	Processed or preserved vegetables and similar	Fermented or pickled vegetables	Pickled / marinated vegetables	Pickled / marinated vegetables	Pickled / marinated vegetables	Pickled / marinated vegetables
Vegetables and vegetable products	Processed or preserved vegetables and similar	Processed tomato products	Sun-dried tomatoes	Sun-dried tomatoes	Sun-dried tomatoes	Sun-dried tomatoes
Vegetables and vegetable products	Processed or preserved vegetables and similar	Processed tomato products	Preserved concentrated tomatoes	Tomato paste	Tomato paste	Tomato paste
Vegetables and vegetable products	Processed or preserved vegetables and similar	Processed tomato products	Preserved tomatoes not concentrated	Preserved tomato, whole or pieces	Preserved tomato, whole or pieces	Preserved tomato, whole or pieces
Vegetables and vegetable products	Processed or preserved vegetables and similar	Processed tomato products	Preserved tomatoes not concentrated	Tomato puree	Tomato puree	Tomato puree
Vegetables and vegetable products	Processed or preserved vegetables and similar	Vegetable puree or paste	Mashed vegetable puree	Mashed vegetable puree	Mashed vegetable puree	Mashed vegetable puree
Vegetables and vegetable products	Processed or preserved vegetables and similar	Vegetable puree or paste	Garlic puree	Garlic puree	Garlic puree	Garlic puree
Water and water-based beverages	Drinking water	Bottled water	Bottled water	Bottled water	Bottled water	Bottled water
Water and water-based beverages	Drinking water	Bottled water	Natural mineral water	Natural mineral water	Natural mineral water	Natural mineral water
Water and water-based beverages	Drinking water	Drinking water	Drinking water	Drinking water	Drinking water	Drinking water
Water and water-based beverages	Drinking water	Unbottled water	Tap water	Tap water	Tap water	Tap water
Water and water-based beverages	Drinking water	Unbottled water	Tap water	Ice from tap water	Ice from tap water	Ice from tap water
Water and water-based beverages	Water based beverages	Soft drinks	Soft drinks	Soft drinks	Soft drinks	Soft drinks
Water and water-based beverages	Water based beverages	Soft drinks	Cola-type drinks	Cola beverages, caffeinic	Cola beverages, caffeinic	Cola beverages, caffeinic
Water and water-based beverages	Water based beverages	Soft drinks	Cola-type drinks	Cola beverages, decaffeinated	Cola beverages, decaffeinated	Cola beverages, decaffeinated
Water and water-based beverages	Water based beverages	Soft drinks	Cola-type drinks	Cola mix, flavoured cola	Cola mix, flavoured cola	Cola mix, flavoured cola
Water and water-based beverages	Water based beverages	Soft drinks	Soft drinks with minor amounts of fruits or flavours	Soft drink, flavoured, no fruit	Soft drink with bitter principle	Soft drink with bitter principle
Water and water-based beverages	Water based beverages	Soft drinks	Soft drinks with minor amounts of fruits or flavours	Soft drink, flavoured, no fruit	Soft drink, lemon flavour	Soft drink, lemon flavour
Water and water-based beverages	Water based beverages	Soft drinks	Soft drinks with minor amounts of fruits or flavours	Soft drink, flavoured, no fruit	Soft drink, orange flavour	Soft drink, orange flavour
Water and water-based beverages	Water based beverages	Soft drinks	Soft drinks with minor amounts of fruits or flavours	Soft drink, flavoured, no fruit	Soft drink, flavoured, no fruit	Soft drink, flavoured, no fruit
Water and water-based beverages	Water based beverages	Soft drinks	Soft drinks with minor amounts of fruits or flavours	Soft drink, with fruit juice (fruit content below the minimum f	Fruit soft drink, orange	Fruit soft drink, orange
Water and water-based beverages	Water based beverages	Soft drinks	Soft drinks with minor amounts of fruits or flavours	Soft drink, with fruit juice (fruit content below the minimum f	Soft drink, with fruit juice (fruit content below the minimum f	Soft drink, with fruit juice (fruit content below the minimum f
Water and water-based beverages	Water based beverages	Water based beverages	Water based beverages	Water based beverages	Water based beverages	Water based beverages
Water and water-based beverages	Water based beverages	Functional drinks	Energy drinks	Energy drinks	Energy drinks	Energy drinks
Water and water-based beverages	Water based beverages	Functional drinks	Isotonic and sport drinks	Isotonic and sport drinks	Isotonic and sport drinks	Isotonic and sport drinks
Animal and vegetable fats and oils and primary derivatives ther	Animal and vegetable fats/oils	Animal and vegetable fats/oils	Animal and vegetable fats/oils	Animal and vegetable fats/oils	Animal and vegetable fats/oils	Animal and vegetable fats/oils
Animal and vegetable fats and oils and primary derivatives ther	Animal and vegetable fats/oils	Animal fats and oils (processed fat from animal tissue)	Animal fats and oils (processed fat from animal tissue)	Animal fats and oils (processed fat from animal tissue)	Animal fats and oils (processed fat from animal tissue)	Animal fats and oils (processed fat from animal tissue)
Animal and vegetable fats and oils and primary derivatives ther	Animal and vegetable fats/oils	Animal fats and oils (processed fat from animal tissue)	Fats and oils from terrestrial animals	Fats and oils from terrestrial animals	Fats and oils from terrestrial animals	Fats and oils from terrestrial animals
Animal and vegetable fats and oils and primary derivatives ther	Animal and vegetable fats/oils	Animal fats and oils (processed fat from animal tissue)	Fats and oils from terrestrial animals	Pork lard	Pork lard	Pork lard
Animal and vegetable fats and oils and primary derivatives ther	Animal and vegetable fats/oils	Animal fats and oils (processed fat from animal tissue)	Fats and oils from terrestrial animals	Goose fat, processed	Goose fat, processed	Goose fat, processed
Animal and vegetable fats and oils and primary derivatives ther	Animal and vegetable fats/oils	Animal fats and oils (processed fat from animal tissue)	Fats and oils from marine animals	Fish oil	Fish oil	Fish oil
Animal and vegetable fats and oils and primary derivatives ther	Animal and vegetable fats/oils	Vegetable fats and oils, edible	Olive oils	Olive oils	Olive oils	Olive oils
Animal and vegetable fats and oils and primary derivatives ther	Animal and vegetable fats/oils	Vegetable fats and oils, edible	Vegetable fats and oils, edible	Vegetable fats and oils, edible	Vegetable fats and oils, edible	Vegetable fats and oils, edible
Animal and vegetable fats and oils and primary derivatives ther	Animal and vegetable fats/oils	Vegetable fats and oils, edible	Other plant oils	Wheat germ oil	Wheat germ oil	Wheat germ oil
Animal and vegetable fats and oils and primary derivatives ther	Animal and vegetable fats/oils	Vegetable fats and oils, edible	Other plant oils	Coconut oil/fat	Coconut oil/fat	Coconut oil/fat
Animal and vegetable fats and oils and primary derivatives ther	Animal and vegetable fats/oils	Vegetable fats and oils, edible	Other plant oils	Palm oil/fat	Palm oil/fat	Palm oil/fat
Animal and vegetable fats and oils and primary derivatives ther	Animal and vegetable fats/oils	Vegetable fats and oils, edible	Seed oils	Pumpkin seed oil	Pumpkin seed oil	Pumpkin seed oil
Animal and vegetable fats and oils and primary derivatives ther	Animal and vegetable fats/oils	Vegetable fats and oils, edible	Seed oils	Maize oil, edible	Maize oil, edible	Maize oil, edible
Animal and vegetable fats and oils and primary derivatives ther	Animal and vegetable fats/oils	Vegetable fats and oils, edible	Seed oils	Sesame seed oil, edible	Sesame seed oil, edible	Sesame seed oil, edible
Animal and vegetable fats and oils and primary derivatives ther	Animal and vegetable fats/oils	Vegetable fats and oils, edible	Seed oils	Linseed oil	Linseed oil	Linseed oil
Animal and vegetable fats and oils and primary derivatives ther	Animal and vegetable fats/oils	Vegetable fats and oils, edible	Seed oils	Walnut oil	Walnut oil	Walnut oil
Animal and vegetable fats and oils and primary derivatives ther	Animal and vegetable fats/oils	Vegetable fats and oils, edible	Seed oils	Rape seed oil, edible	Rape seed oil, edible	Rape seed oil, edible
Animal and vegetable fats and oils and primary derivatives ther	Animal and vegetable fats/oils	Vegetable fats and oils, edible	Seed oils	Safflower seed oil, edible	Safflower seed oil, edible	Safflower seed oil, edible
Animal and vegetable fats and oils and primary derivatives ther	Animal and vegetable fats/oils	Vegetable fats and oils, edible	Seed oils	Sunflower seed oil, edible	Sunflower seed oil, edible	Sunflower seed oil, edible
Animal and vegetable fats and oils and primary derivatives ther	Animal and vegetable fats/oils	Vegetable fats and oils, edible	Seed oils	Peanut oil, edible	Peanut oil, edible	Peanut oil, edible
Animal and vegetable fats and oils and primary derivatives ther	Animal and vegetable fats/oils	Vegetable fats and oils, edible	Seed oils	Soya bean oil, refined	Soya bean oil, refined	Soya bean oil, refined
Animal and vegetable fats and oils and primary derivatives ther	Animal and vegetable fats/oils	Dairy fats	Cow milk fat (not emulsified)	Butter oil	Butter oil	Butter oil
Animal and vegetable fats and oils and primary derivatives ther	Fat emulsions and blended fats	Butter	Butter	Butter	Butter	Butter
Animal and vegetable fats and oils and primary derivatives ther	Fat emulsions and blended fats	Blended fat and oils	Blended frying oil/fats	Blended frying oil/fats	Blended frying oil/fats	Blended frying oil/fats
Animal and vegetable fats and oils and primary derivatives ther	Fat emulsions and blended fats	Blended fat and oils	Butter and margarine/oil blends	Butter and margarine/oil blends	Butter and margarine/oil blends	Butter and margarine/oil blends
Animal and vegetable fats and oils and primary derivatives ther	Fat emulsions and blended fats	Margarines and similar	Blended margarine	Blended margarine	Blended margarine	Blended margarine
Animal and vegetable fats and oils and primary derivatives ther	Fat emulsions and blended fats	Margarines and similar	Traditional margarine	Traditional margarine	Traditional margarine	Traditional margarine
Major isolated ingredients, additives, flavours, baking and pro	Starches	Wheat starch	Wheat starch	Wheat starch	Wheat starch	Wheat starch
Major isolated ingredients, additives, flavours, baking and pro	Starches	Potato starch	Potato starch	Potato starch	Potato starch	Potato starch
Major isolated ingredients, additives, flavours, baking and pro	Starches	Maize starch	Maize starch	Maize starch	Maize starch	Maize starch
Major isolated ingredients, additives, flavours, baking and pro	Starches	Starches	Starches	Starches	Starches	Starches
Major isolated ingredients, additives, flavours, baking and pro	Isolated proteins and other protein products	Gelatine	Gelatine	Gelatine	Gelatine	Gelatine
Major isolated ingredients, additives, flavours, baking and pro	Miscellaneous agents for food processing	Live microorganisms for food production	Yeast cultures	Baking yeast	Baking yeast	Baking yeast

## Sheet: T SI-5 map targets, raw product
raw product aggregate ar	raw product r
Cereals	Amaranth grain
Cereals	Barley flakes
Cereals	Barley flour
Cereals	Barley grain, whole
Cereals	Barley, pearled
Cereals	Buckwheat flour
Cereals	Buckwheat grain
Cereals	Bulgur wheat
Cereals	Common wheat grain
Cereals	Corn flakes
Cereals	Corn flour
Cereals	Corn grain
Cereals	Corn starch
Cereals	Cornmeal
Cereals	Malt extract
Cereals	Malted barley
Cereals	Millet grain
Cereals	Oat bran
Cereals	Oat flakes
Cereals	Oat flour
Cereals	Oats, grain
Cereals	Quinoa grain
Cereals	Rice flakes
Cereals	Rice flour
Cereals	Rice starch
Cereals	Rice, brown
Cereals	Rice, cooked, polished
Cereals	Rice, long-grain
Cereals	Rice, popped
Cereals	Rice, white
Cereals	Rice, wild
Cereals	Rye flour, light
Cereals	Rye flour, medium
Cereals	Rye flour, wholemeal
Cereals	Rye grain
Cereals	Spelt flakes
Cereals	Spelt flour, wholemeal
Cereals	Spelt grain
Cereals	Wheat bran
Cereals	Wheat flakes
Cereals	Wheat flour, brown
Cereals	Wheat flour, white
Cereals	Wheat flour, wholemeal
Cereals	Wheat germ
Cereals	Wheat grain, Durum
Cereals	Wheat semolina, Durum
Cereals	Wheat semolina, soft wheat
Eggs	Duck eggs
Eggs	Egg white, chicken
Eggs	Egg yolk, chicken
Eggs	Goose eggs
Eggs	Quail eggs
Eggs	Whole egg, chicken
Fish	Anchovy (Engraulis)
Fish	Babel (Barbus)
Fish	Bass (Marone)
Fish	Bonito (Sarda Sarda)
Fish	Bream (Charax)
Fish	Carp (Cyprinus)
Fish	Char (Salvelinus)
Fish	Clam (Mya arenaria)
Fish	Coalfish (Pollachius virens)
Fish	Cockle (Cardium edule)
Fish	Cod (Gadus morhua)
Fish	Cod liver
Fish	Crab (Cancer spp.)
Fish	Crawfish (Panulirus spp.)
Fish	Crayfish (Astacus spp.)
Fish	Cuttlefish (Sepia officinalis)
Fish	Eels (Apodes)
Fish	Fish roe, Cod
Fish	Fish roe, Lumpfish
Fish	Flounder (Platichthys flesus)
Fish	Frog legs (Rana spp.)
Fish	Grey mullet (Mugil)
Fish	Haddock (Melanogrammus aeglefinus)
Fish	Hake (Merluccius)
Fish	Halibut (Hippoglossus spp.)
Fish	Herring (Clupea)
Fish	Lobster (Homarus vulgaris)
Fish	Lophiiformes (Pediculati)
Fish	Mackeral (Scomber)
Fish	Mussel (Mytilus edulis)
Fish	Norway lobster (Nephrophs norvegicus)
Fish	Octopus (Octopus vulgaris)
Fish	Oyster (Ostrea edulis)
Fish	Perch (Perca)
Fish	Plaice (Pleuronectes)
Fish	Prawns (Palaemon serratus)
Fish	Rays (Hypotremata)
Fish	Salmon (Salmo salar)
Fish	Sardine and pilchard (Sardina)
Fish	Sardinops (Sardinops sagax)
Fish	Scallop (Pecten spp.)
Fish	Sea catfish (Ariidae)
Fish	Selachoidei (Pleurotremata)
Fish	Shad (Alosa)
Fish	Shrimps (Crangon crangon)
Fish	Smelt (Osmerus)
Fish	Snail (Helix sp.)
Fish	Sole (Limanda; Solea)
Fish	Sprat (Sprattus sprattus)
Fish	Squid (Loligo vulgaris)
Fish	Swordfish (Xiphidae spp.)
Fish	Trout (Oncorhynchus mykiss)
Fish	Tuna (Thunnus)
Fish	Whelk (Buccinum undatum, Fusus antiquus)
Fish	Whitefish (Coregonus)
Fish	Whiting (Merlangius merlangus)
Fish	Winkle (Littorina littorea)
Fruit	American persimmon (Virginia kaki) (Diospyros virginiana)
Fruit	Apple (Malus domesticus)
Fruit	Apricots (Prunus armeniaca)
Fruit	Avocados (Persea americana)
Fruit	Azarole (mediteranean medlar) (Crataegus azarolus)
Fruit	Bananas (Musa x paradisica)
Fruit	Bilberry or whortleberry (Vaccinium spp.)
Fruit	Bread fruit (jackfruit) (Artocarpus altilis)
Fruit	Carambola (Averrhoa carambola)
Fruit	Chayote (Sechium edule)
Fruit	Cherimoya (Annona cherimola)
Fruit	Cloudberry (Rubus chamaemorus)
Fruit	Currants (red, black and white) (Ribes nigrum, Ribes rubrum)
Fruit	Damson plum (Prunus domestica var institia)
Fruit	Dates (Phoenix dactylifera)
Fruit	Elderberries (Sambucus nigra)
Fruit	Figs (Ficus carica)
Fruit	Grapefruit (Citrus paradisi)
Fruit	Greengage (Prunus domestica var italica)
Fruit	Guava (Psidium guajava)
Fruit	Kiwi (Actinidia deliciosa syn. A. chinensis)
Fruit	Kumquats (Fortunella species)
Fruit	Lemons (Citrus limon)
Fruit	Limes (Citrus aurantifolia)
Fruit	Lingonberry (Vaccinium vitis-idaea)
Fruit	Loganberry (Rubus loganobaccus)
Fruit	Longan fruit (Dimocarpus longan)
Fruit	Loquat (Eriobotrya japonica)
Fruit	Lychee (Litchi) (Litchi chinensis)
Fruit	Mandarins (Citrus reticulata)
Fruit	Mangoes (Mangifera indica)
Fruit	Medlar (Mespilus germanica)
Fruit	Melons (Cucumis melo)
Fruit	Mirabelle (Prunus domestica var syriaca)
Fruit	Mulberries (Morus spp.)
Fruit	Nashi pear (Pyrus pyrifolia)
Fruit	Oranges (Citrus sinensis)
Fruit	Papaya (Carica papaya)
Fruit	Passion fruit (Passiflora edulis)
Fruit	Pawpaw (Asimina)
Fruit	Peaches (Prunus persica)
Fruit	Pear (Pyrus communis)
Fruit	Persimmon (Sharon fruit) (Diospyros kaki)
Fruit	Physalis (Physalis peruviana)
Fruit	Pineapples (Ananas comosus)
Fruit	Plums (Prunus domestica)
Fruit	Pomelo (Citrus grandis)
Fruit	Prickly pear (cactus fruit) (Opuntia ficus-indica)
Fruit	Raspberries (Rubus idaeus)
Fruit	Rhubarb (Rheum x hybridum)
Fruit	Rowan (Sorbus)
Fruit	Sea buckthorn (Hippophae rhamnoides)
Fruit	Sour cherry (Prunus cerasus)
Fruit	Strawberries (Fragaria x ananassa)
Fruit	Sweet cherry (Prunus avium)
Fruit	Table grapes (Vitis euvitis)
Fruit	Watermelons (Citrullus lanatus)
Fruit	Wine grapes (Vitis euvitis)
Juices	Blackberries (Rubus fruticosus)
Juices	Blueberries (Vaccinium corymbosum)
Juices	Gooseberries (Ribes uva-crispa)
Juices	Head cabbage (Brassica oleracea convar. capitata)
Juices	Juice concentrate, Apple
Juices	Juice concentrate, Currants (black)
Juices	Juice concentrate, Currants (red)
Juices	Juice concentrate, Gooseberries
Juices	Juice concentrate, Lemon
Juices	Juice concentrate, Lime
Juices	Juice concentrate, Mandarins
Juices	Juice concentrate, Mango
Juices	Juice concentrate, Oranges
Juices	Juice concentrate, Papaya
Juices	Juice concentrate, Passion fruit
Juices	Juice concentrate, Peaches
Juices	Juice concentrate, Pear
Juices	Juice concentrate, Plums
Juices	Juice concentrate, Raspberries
Juices	Juice concentrate, Sweet cherry
Juices	Juice, apple
Juices	Juice, Apricot
Juices	Juice, beetroot
Juices	Juice, Blackberry
Juices	Juice, Blackcurrant
Juices	Juice, Blueberry
Juices	Juice, carrot
Juices	Juice, celery
Juices	Juice, Cherry
Juices	Juice, Cranberry
Juices	Juice, Cucumber
Juices	Juice, elderberry
Juices	Juice, grape
Juices	Juice, grapefruit
Juices	Juice, Guava
Juices	Juice, kiwi
Juices	Juice, lemon
Juices	Juice, Lime
Juices	Juice, Mandarin
Juices	Juice, orange
Juices	Juice, Passion fruit
Juices	Juice, Peach
Juices	Juice, pear
Juices	Juice, pineapple
Juices	Juice, Prune
Juices	Juice, Raspberry
Juices	Juice, Redcurrant
Juices	Juice, Strawberry
Juices	Juice, tomato
Juices	Main-crop potatoes
Juices	Pomegranate (Punica granatum)
Juices	Quince (Cydonia oblonga)
Juices	Rose hips (Rosa canina)
Legumes	Beans (dry), soaked/boiled/canned
Legumes	Beans (Phaseolus vulgaris)
Legumes	Beans, green, without pods (Phaseolus vulgaris)
Legumes	Black eye bean (Vigna unguiculata)
Legumes	Broad bean (Vicia faba)
Legumes	Chick pea (Cicer arietinum)
Legumes	Chick pea flour
Legumes	Lentils (dry), soaked/boiled/canned
Legumes	Lentils (Lens culinaris syn. L. esculenta)
Legumes	Lima bean (Phaseolus lunatis)
Legumes	Mung bean (Phaseolus aureus)
Legumes	Pigeon pea, (Cajanus cajan)
Legumes	Soya beans (Glycine max)
Legumes	Soya beans flour
Legumes	Soya beans, soaked/boiled/canned
Dairy	Acidophilus milk
Dairy	Ass milk
Dairy	Buffalo milk
Dairy	Buttermilk
Dairy	Cheese, Appenzeller
Dairy	Cheese, Arzua Ulloa
Dairy	Cheese, Asiago
Dairy	Cheese, Bavarian Blue
Dairy	Cheese, Beaufort
Dairy	Cheese, Bleu d'Auvergne
Dairy	Cheese, Blue Castello
Dairy	Cheese, Boursin
Dairy	Cheese, Brie
Dairy	Cheese, Buche de Chevre
Dairy	Cheese, Burrata
Dairy	Cheese, Butterkase
Dairy	Cheese, Cabrales
Dairy	Cheese, Caciocavallo
Dairy	Cheese, Caerphilly
Dairy	Cheese, Camembert
Dairy	Cheese, Cantal
Dairy	Cheese, Capra
Dairy	Cheese, Chaource
Dairy	Cheese, Cheddar
Dairy	Cheese, Cheshire
Dairy	Cheese, Chevres
Dairy	Cheese, Chimay
Dairy	Cheese, Comte
Dairy	Cheese, Cottage
Dairy	Cheese, Coulommiers
Dairy	Cheese, Cream Havarti
Dairy	Cheese, Danbo
Dairy	Cheese, Double Gloucester
Dairy	Cheese, Edam
Dairy	Cheese, Emmental
Dairy	Cheese, Epoisses
Dairy	Cheese, Esrom
Dairy	Cheese, Feta
Dairy	Cheese, Fontina
Dairy	Cheese, Fourme d'Ambert
Dairy	Cheese, Gorgonzola
Dairy	Cheese, Gouda
Dairy	Cheese, Graddost
Dairy	Cheese, Grana Padano
Dairy	Cheese, Gruyere
Dairy	Cheese, Harzer
Dairy	Cheese, Idiazabal
Dairy	Cheese, Juustoleipa
Dairy	Cheese, Kasseri
Dairy	Cheese, Kefalotyri
Dairy	Cheese, Lancashire
Dairy	Cheese, Langres
Dairy	Cheese, Leicester
Dairy	Cheese, Leyden
Dairy	Cheese, Limburger
Dairy	Cheese, Livarot
Dairy	Cheese, Maasdam
Dairy	Cheese, Mahon
Dairy	Cheese, Majorero
Dairy	Cheese, Manchego
Dairy	Cheese, Mascarpone
Dairy	Cheese, Mimolette
Dairy	Cheese, Mizithra
Dairy	Cheese, Morbier
Dairy	Cheese, Mozzarella
Dairy	Cheese, Munster
Dairy	Cheese, Nagelkaas
Dairy	Cheese, Oltermanni
Dairy	Cheese, Parmigiano Reggiano
Dairy	Cheese, Passendale
Dairy	Cheese, Pecorino Romano
Dairy	Cheese, Pecorino Toscano
Dairy	Cheese, Pont L'Eveque
Dairy	Cheese, Pouligny-Saint-Pierre
Dairy	Cheese, processed cheese, plain
Dairy	Cheese, processed spreadable
Dairy	Cheese, processed, low fat
Dairy	Cheese, processed, sliceable
Dairy	Cheese, Provolone
Dairy	Cheese, Raclette
Dairy	Cheese, Reblochon
Dairy	Cheese, Ricotta
Dairy	Cheese, Robiola
Dairy	Cheese, Roquefort
Dairy	Cheese, Saint Marcellin
Dairy	Cheese, Saint Nectaire
Dairy	Cheese, Saint Paulin
Dairy	Cheese, Scamorza
Dairy	Cheese, Smoked Gouda
Dairy	Cheese, Stilton
Dairy	Cheese, Telemea
Dairy	Cheese, Tetilla
Dairy	Cheese, Tilsit
Dairy	Cheese, Tomme de Savoie
Dairy	Cheese, Torta del Casar
Dairy	Cheese, Trappist
Dairy	Cheese, Urda
Dairy	Cheese, Vacherin Mont d'Or
Dairy	Cheese, Wensleydale
Dairy	Cheese, White Stilton
Dairy	Coffee cream 10 % fat
Dairy	Coffee cream 12% fat
Dairy	Coffee cream 15% fat
Dairy	Coffee cream 20% fat
Dairy	Coffee cream 30% fat
Dairy	Condensed milk 10 % fat
Dairy	Condensed milk 4% fat
Dairy	Condensed milk 7.5 % fat
Dairy	Condensed milk low fat
Dairy	Cow milk, 1 - 2.9% fat (semi-skimmed milk)
Dairy	Cow milk, 3 - 4% fat (whole milk)
Dairy	Cow milk, < 1% fat (skimmed milk)
Dairy	Cow milk, > 4% fat (inc. Channel Island milk)
Dairy	Cream 10% fat
Dairy	Cream 20% fat
Dairy	Cream 30 % fat
Dairy	Cream 40 % fat
Dairy	Cream powder
Dairy	Cream, > 50% fat (inc. clotted cream)
Dairy	Cr�me fra�che, 13% fat
Dairy	Cr�me fra�che, 15-20% fat
Dairy	Cr�me fra�che, 28% fat
Dairy	Cr�me fra�che, 30% fat
Dairy	Cr�me fra�che, >30% fat
Dairy	Evaporated milk (milk evaporated down to less than a half of it
Dairy	Filmj�lk
Dairy	Goat milk
Dairy	Kefir
Dairy	Milk powder, semi-skimmed
Dairy	Milk powder, skimmed
Dairy	Milk powder, whole
Dairy	Non-fat sour cream
Dairy	Quark
Dairy	Sheep milk
Dairy	Sour cream 10 % fat
Dairy	Sour cream 12% fat
Dairy	Sour cream 20 % fat
Dairy	Sour cream 30 % fat
Dairy	Sour cream 40 % fat
Dairy	Sour milk
Dairy	Viili
Dairy	Whey powder
Dairy	Whey, plain
Dairy	Yoghurt, cow milk, 1 - 3% fat
Dairy	Yoghurt, cow milk, < 1% fat
Dairy	Yoghurt, cow milk, > 3% fat
Nuts, seeds	Almond, bitter (Prunus amygalus amara)
Nuts, seeds	Almond, sweet (Prunus amygalus dulcis)
Nuts, seeds	Brazil Nuts, seeds (Bertholletia excelsa)
Nuts, seeds	Cashew Nuts, seeds (Anacardium occidentale)
Nuts, seeds	ChestNuts, seeds (Castanea sativa)
Nuts, seeds	CocoNuts, seeds (Cocos nucifera)
Nuts, seeds	HazelNuts, seeds (Corylus avellana)
Nuts, seeds	Hempseed (Cannabis sativa)
Nuts, seeds	Linseed (Linum usitatissimum)
Nuts, seeds	Macadamia (Macadamia ternifolia)
Nuts, seeds	Other seeds
Nuts, seeds	Peanut (Arachis hypogea)
Nuts, seeds	Pecans (Carya illinoensis)
Nuts, seeds	Pine Nuts, seeds (Pinus pinea)
Nuts, seeds	Pistachios (Pistachia vera)
Nuts, seeds	Poppy seed (Papaver somniferum)
Nuts, seeds	Pumpkin seeds (Cucurbita pepo var. oleifera)
Nuts, seeds	Safflower (Carthamus tinctorius)
Nuts, seeds	Sesam paste (Tahini) (Sesamus indicum)
Nuts, seeds	Sesame seed (Sesamum indicum syn. S. orientale)
Nuts, seeds	Sunflower seed (Helianthus annuus)
Nuts, seeds	Walnuts, seeds (Juglans regia)
Unsat. plant oils	Linseed oil
Unsat. plant oils	Maize oil, edible
Unsat. plant oils	Olive oil
Unsat. plant oils	Peanut oil
Unsat. plant oils	Pumpkin seed oil
Unsat. plant oils	Rapeseed oil
Unsat. plant oils	Sesame oil
Unsat. plant oils	Soybean oil
Unsat. plant oils	Sunflower oil
Unsat. plant oils	Walnut oil
Unsat. plant oils	Wheat germ oil
Potatoes	Main-crop potatoes
Potatoes	Mashed potato powder
Potatoes	New potatoes
Potatoes	Potato flakes
Potatoes	Potato flour
Potatoes	Potato starch
Poultry	Chicken liver
Poultry	Chicken liver, cooked
Poultry	Chicken muscle
Poultry	Chicken muscle, cooked
Poultry	Chicken muscle, extract
Poultry	Chicken muscle, fried
Poultry	Chicken muscle, roasted
Poultry	Chicken muscle, stewed
Poultry	Duck liver
Poultry	Duck muscle
Poultry	Duck muscle, cooked
Poultry	Giblet (chicken)
Poultry	Goose liver
Poultry	Goose liver, cooked
Poultry	Goose muscle
Poultry	Goose muscle, cooked
Poultry	Guinea fowl meat (Numida meleagris)
Poultry	Mallard (Anas platyrhynchos)
Poultry	Ostrich meat (Struthio camelus)
Poultry	Partridge meat (Perdix perdix)
Poultry	Pheasant meat (Phasianus colchius)
Poultry	Pigeon meat (Columba spp.)
Poultry	Ptarmigan meat (Lagopus mutus)
Poultry	Quail meat (Coturnix coturnix)
Poultry	Turkey fat tissue
Poultry	Turkey liver
Poultry	Turkey muscle
Poultry	Turkey muscle, cooked
Processed meat	Beef kidney
Processed meat	Beef liver
Processed meat	Beef liver, cooked
Processed meat	Beef muscle
Processed meat	Beef muscle, cooked
Processed meat	Beef muscle, cured
Processed meat	Beef muscle, dried
Processed meat	Beef muscle, extract
Processed meat	Beef muscle, fried
Processed meat	Beef muscle, roasted
Processed meat	Beef muscle, stewed
Processed meat	Blood (beef), cooked
Processed meat	Blood (pork), cooked
Processed meat	Boar meat (wild pig) (Sus scrofa)
Processed meat	Brain (pork)
Processed meat	Chicken fat
Processed meat	Chicken liver
Processed meat	Chicken liver, cooked
Processed meat	Chicken muscle
Processed meat	Chicken muscle, cooked
Processed meat	Chicken muscle, extract
Processed meat	Chicken muscle, fried
Processed meat	Chicken muscle, roasted
Processed meat	Chicken muscle, stewed
Processed meat	Duck fat
Processed meat	Duck liver
Processed meat	Duck muscle
Processed meat	Duck muscle, cooked
Processed meat	Elk meat (Alces alces)
Processed meat	Giblet (chicken)
Processed meat	Goose fat
Processed meat	Goose liver
Processed meat	Goose liver, cooked
Processed meat	Goose muscle
Processed meat	Goose muscle, cooked
Processed meat	Guinea fowl meat (Numida meleagris)
Processed meat	Hare meat (Lepus europaeus)
Processed meat	Heart (beef)
Processed meat	heart (pork)
Processed meat	Horse, asses, mules or hinnies meat (Equus spp.)
Processed meat	Lungs (beef)
Processed meat	Mallard (Anas platyrhynchos)
Processed meat	Marrowbone (beef)
Processed meat	Mutton / lamb meat (Ovis aries)
Processed meat	Ostrich meat (Struthio camelus)
Processed meat	Partridge meat (Perdix perdix)
Processed meat	Pheasant meat (Phasianus colchius)
Processed meat	Pigeon meat (Columba spp.)
Processed meat	Pork / piglet meat (Sus scrofa)
Processed meat	Pork kidney
Processed meat	Pork lard (Schmaltz)
Processed meat	Pork liver
Processed meat	Pork liver, cooked
Processed meat	Pork muscle
Processed meat	Pork muscle, cooked
Processed meat	Pork muscle, cured
Processed meat	Pork muscle, dried
Processed meat	Pork muscle, fried
Processed meat	Pork muscle, roasted
Processed meat	Pork muscle, stewed
Processed meat	Ptarmigan meat (Lagopus mutus)
Processed meat	Quail meat (Coturnix coturnix)
Processed meat	Rabbit meat (Lepus cuniculus)
Processed meat	Reindeer meat (Rangifer tarandus)
Processed meat	Sheep kidney
Processed meat	Sheep muscle
Processed meat	Sheep muscle, roasted
Processed meat	Sheep muscle, stewed
Processed meat	Skin (pork)
Processed meat	Spleen (beef)
Processed meat	Stomach (beef)
Processed meat	Tail (beef)
Processed meat	Tallow
Processed meat	Thymus (veal)
Processed meat	Tongue (beef)
Processed meat	Tongue (pork)
Processed meat	Trotters (pork)
Processed meat	Turkey fat tissue
Processed meat	Turkey liver
Processed meat	Turkey muscle
Processed meat	Turkey muscle, cooked
Processed meat	Veal fat tissue
Processed meat	Veal kidney
Processed meat	Veal liver
Processed meat	Veal liver, cooked
Processed meat	Veal muscle
Processed meat	Veal muscle, cooked
Processed meat	Venison meat (Cervus spp.)
Red meat	Beef kidney
Red meat	Beef liver
Red meat	Beef liver, cooked
Red meat	Beef muscle
Red meat	Beef muscle, cooked
Red meat	Beef muscle, cured
Red meat	Beef muscle, dried
Red meat	Beef muscle, extract
Red meat	Beef muscle, fried
Red meat	Beef muscle, roasted
Red meat	Beef muscle, stewed
Red meat	Blood (beef), cooked
Red meat	Blood (pork), cooked
Red meat	Boar meat (wild pig) (Sus scrofa)
Red meat	Brain (pork)
Red meat	Elk meat (Alces alces)
Red meat	Hare meat (Lepus europaeus)
Red meat	Heart (beef)
Red meat	heart (pork)
Red meat	Horse, asses, mules or hinnies meat (Equus spp.)
Red meat	Lungs (beef)
Red meat	Marrowbone (beef)
Red meat	Mutton / lamb meat (Ovis aries)
Red meat	Pork / piglet meat (Sus scrofa)
Red meat	Pork kidney
Red meat	Pork liver
Red meat	Pork liver, cooked
Red meat	Pork muscle
Red meat	Pork muscle, cooked
Red meat	Pork muscle, cured
Red meat	Pork muscle, dried
Red meat	Pork muscle, fried
Red meat	Pork muscle, roasted
Red meat	Pork muscle, stewed
Red meat	Rabbit meat (Lepus cuniculus)
Red meat	Reindeer meat (Rangifer tarandus)
Red meat	Sheep kidney
Red meat	Sheep muscle
Red meat	Sheep muscle, roasted
Red meat	Sheep muscle, stewed
Red meat	Skin (pork)
Red meat	Spleen (beef)
Red meat	Stomach (beef)
Red meat	Tail (beef)
Red meat	Thymus (veal)
Red meat	Tongue (beef)
Red meat	Tongue (pork)
Red meat	Trotters (pork)
Red meat	Veal fat tissue
Red meat	Veal kidney
Red meat	Veal liver
Red meat	Veal liver, cooked
Red meat	Veal muscle
Red meat	Veal muscle, cooked
Red meat	Venison meat (Cervus spp.)
Anim. spread. fats	Butter
Anim. spread. fats	Chicken fat
Anim. spread. fats	Duck fat
Anim. spread. fats	Goose fat
Anim. spread. fats	Pork lard (Schmaltz)
Anim. spread. fats	Tallow
Plant spread. fats	Coconut fat
Plant spread. fats	Coconut oil
Plant spread. fats	Linseed oil
Plant spread. fats	Maize oil, edible
Plant spread. fats	Olive oil
Plant spread. fats	Palm fat
Plant spread. fats	Palm kernel oil
Plant spread. fats	Palm oil
Plant spread. fats	Peanut oil
Plant spread. fats	Pumpkin seed oil
Plant spread. fats	Rapeseed oil
Plant spread. fats	Sesame oil
Plant spread. fats	Soybean oil
Plant spread. fats	Sunflower oil
Plant spread. fats	Walnut oil
Plant spread. fats	Wheat germ oil
Sugar	Brown Sugar
Sugar	Cane Sugar
Sugar	Corn syrup
Sugar	Molasses
Sugar	Sugar beet syrup
Sugar	Sugar, icing
Sugar	White Sugar
Vegetables	Alfalfa spouts, fresh (Medicago sativa)
Vegetables	Allspice (Pimenta dioica)
Vegetables	Anise seed (Pimpinella anisum)
Vegetables	Asparagus (Asparagus officinalis)
Vegetables	Aubergines (egg plants) (Solanum melongena)
Vegetables	Bamboo shoots (Bambusa vulgaris)
Vegetables	Basil, dried
Vegetables	Basil, herb (Ocimum basilicum)
Vegetables	Bay leaves (laurel) (Laurus nobilis)
Vegetables	Bean sprout
Vegetables	Beans, with pods (Phaseolus vulgaris)
Vegetables	Beet leaves (Beta vulgaris)
Vegetables	Beetroot (Beta vulgaris subsp. vulgaris)
Vegetables	Boletus (Boletus (and other) spp.)
Vegetables	Borage (Borago officinalis)
Vegetables	Broccoli (Brassica oleracea var. italica)
Vegetables	Brussels sprouts (Brassica oleracea var. gemmifera)
Vegetables	Cantharelle (Cantharellus cibarius)
Vegetables	Capers (Capparis spinosa)
Vegetables	Caraway (Carum carvi)
Vegetables	Cardamom (Elettaria cardamomum)
Vegetables	Cardoons (Cynara cardunculus)
Vegetables	Carob fruit (Ceratonia siliqua)
Vegetables	Carrots (Daucus carota)
Vegetables	Cauliflower (Brassica oleracea var. botrytis)
Vegetables	Cayenne pepper (Capsicum frutescens)
Vegetables	Celeriac (Apium graveolens var. rapaceum)
Vegetables	Celery (Apium graveolens var. dulce)
Vegetables	Celery leaves (Apium graveolens var. seccalinum)
Vegetables	Chervil, herb (Anthriscus cerefolium)
Vegetables	Chicory roots (Cichorium intybus)
Vegetables	Chilli pepper (Capsicum frutescens)
Vegetables	Chilli powder
Vegetables	Chinese cabbage (Brassica pekinensis)
Vegetables	Chives, bulb (Allium schoenoprasum)
Vegetables	Chives, herb (Allium schoenoprasum)
Vegetables	Cinnamon (Cinnamonum verum syn. C. zeylanicum)
Vegetables	Cloves (Syzygium aromaticum)
Vegetables	Coriander leaves
Vegetables	Coriander seed (Coriandrum sativum)
Vegetables	Courgettes (Zucchini) (Cucurbita pepo var. melopepo)
Vegetables	Cress (Lepidium sativum)
Vegetables	Cucumbers (Cucumis sativus)
Vegetables	Cultivated mushroom (syn. Button mushroom) (Agaricus bisporus)
Vegetables	Cumin seed (Cuminum cyminum)
Vegetables	Dandelion leaf (Taraxacum officinalis)
Vegetables	Dill seed (Anethum graveolens)
Vegetables	Dill, herb (Anethum graveolens)
Vegetables	Endive, scarole (broad-leaf endive) (Cichorium endiva)
Vegetables	Fennel (Foeniculum vulgare)
Vegetables	Fennel seed (Foeniculum vulgare)
Vegetables	Fenugreek (Trigonella foenumgraecum)
Vegetables	Garden orache (Atriplex hortensis)
Vegetables	Garlic, bulb (Allium sativum)
Vegetables	Garlic, dried
Vegetables	Gherkins (Cucumis sativus)
Vegetables	Ginger (Zingiber officinale)
Vegetables	Ginger, dried
Vegetables	Ginseng root (Panax ginseng)
Vegetables	Globe artichokes (Cynara scolymus)
Vegetables	Honey mushroom (Armillaria mellea)
Vegetables	Hops (dried), including hop pellets and unconcentrated powder (
Vegetables	Horseradish (Armoracia rusticana)
Vegetables	Iceberg-type lettuce
Vegetables	Irish moss (Chondrus crispus)
Vegetables	Jerusalem artichokes tubers (Helianthus tuberosus)
Vegetables	Juniper berries (Juniperus communis)
Vegetables	Kale (Brassica oleracea convar. Acephalea)
Vegetables	Kohlrabi (Brassica oleracea convar. acephala, var. gongylodes)
Vegetables	Kombu (Laminaria spp.)
Vegetables	Lamb's lettuce (Valerianella locusta)
Vegetables	Land cress (Barbarea verna)
Vegetables	Laver (Porphyra spp.)
Vegetables	Leek (Allium porrum)
Vegetables	Lettuce, excluding Iceberg-type lettuce (Lactuca sativa)
Vegetables	Lovage leaves
Vegetables	Mace (Myristica fragrans)
Vegetables	Marjoram
Vegetables	Mint
Vegetables	Morel (Morchella esculanta)
Vegetables	Nettle (Urtica dioica)
Vegetables	Nutmeg (Myristica fragans)
Vegetables	Okra, lady�s fingers (Hibiscus esculentus)
Vegetables	Onions, bulb (Allium cepa)
Vegetables	Onions, dried
Vegetables	Orange agaric (Lactarius deliciosus)
Vegetables	Origano
Vegetables	Origano, dried
Vegetables	Oyster mushroom (Pleurotus ostreatus)
Vegetables	Palm hearts (Euterpa oleracea, Cocos nucifera, Bactris gasipaes
Vegetables	Paprika powder
Vegetables	Parsley root (Petroselinum crispum)
Vegetables	Parsley, herb (Petroselinum crispum)
Vegetables	Parsnips (Pastinaca sativa)
Vegetables	Peas (dry), soaked/boiled/canned
Vegetables	Peas (Pisum sativum)
Vegetables	Peas, green, without pods (Pisum sativum)
Vegetables	Peas, with pods (Pisum sativum)
Vegetables	Pepper, black and white (Piper nigrum)
Vegetables	Peppermint (Mentha x piperita)
Vegetables	Peppers, paprika (Capsicum annuum, var. grossum and var. longum
Vegetables	Pumpkins (Cucurbita maxima)
Vegetables	Purslane (Portulaca oleracea)
Vegetables	Radishes (Raphanus sativus var. sativus)
Vegetables	Rocket, Rucola (Eruca sativa, Diplotaxis spec.)
Vegetables	Rosemary, herb (Rosmarinus officinalis)
Vegetables	Saffron (Crocus sativus)
Vegetables	Sage, dried
Vegetables	Sage, herb (Salvia officinalis)
Vegetables	Salsify (Tragopogon porrifolius)
Vegetables	Sauerkraut
Vegetables	Shallots, bulb (Allium ascalonicum, Allium cepa var. aggregatum
Vegetables	Shiitake mushroom (Lentinus edodes)
Vegetables	Sorrel (Rumex spp.)
Vegetables	Spinach (fresh) (Spinacia oleracea)
Vegetables	Spring onions, bulb (Allium cepa)
Vegetables	Strawberry leaves (Fragaria x ananassa)
Vegetables	Sun-dried tomatoes
Vegetables	Swedes (Brassica napus var. napobrassica)
Vegetables	Sweet corn (Zea mays var. saccharata)
Vegetables	Tamarind (Tamarindus indica)
Vegetables	Tarragon, herb (Artemisia dracunculus)
Vegetables	Thyme, dried
Vegetables	Thyme, herb (Thymus spp.)
Vegetables	Tomato pur�e
Vegetables	Tomato, canned
Vegetables	Tomato, paste
Vegetables	Tomatoes (Lycopersicum esculentum)
Vegetables	Truffle (Tuber spp.)
Vegetables	Turmeric (Curcuma) (Curcuma domestica syn. C. longa)
Vegetables	Turnips (Brassica rapa)
Vegetables	Vine leaves (grape leaves) (Vitis euvitis)
Vegetables	Wakame (Undaria spp)
Vegetables	Water cress (Nasturtium officinale)
Vegetables	Winter savory
Vegetables	Witloof (Cichorium intybus. var. foliosum)
Vegetables	Yam bean (Pachyrrizus erosus)
Wholegrain	Barley grain, whole
Wholegrain	Oat bran
Wholegrain	Oat flakes
Wholegrain	Oat flour
Wholegrain	Oats, grain
Wholegrain	Rice, brown
Wholegrain	Rye flour, wholemeal
Wholegrain	Spelt flour, wholemeal
Wholegrain	Wheat bran
Wholegrain	Wheat flour, brown
Wholegrain	Wheat flour, wholemeal

[truncated: 3 more sheets: T SI-6 map targets, food, T SI-7 Fig aggreg food, T SI-8 nutrients PHD2.0, NoNutr]
